# Supplementary material for: Uniparental Markers of Contemporary Italian Population Reveals Details on Its Pre-Roman Heritage
Source: PLoS One. 2012 Dec 10;7(12):e50794. doi: 10.1371/journal.pone.0050794 (PMC3519480; doi:10.1371/journal.pone.0050794)
Supplement: Table S1 — mtSNPs and primers used to characterize J/T and U and some of their sub-clades. (XLS) [file pone.0050794.s001.xls]

## Sheet: Supplementary Table S1
Supplementary Table S1. mtSNPs and primers used to characterize J/T and U and some of their sub-clades
		Amplification primers			Minisequencing primers
SNP	Variant	Size (bp)	Forward and reverse primers	FCa (µM)	Chain	Size (bp)	Extension primer	FCb (µM))
497	G-C	86	ttattttcccctcccactcc	2	H	36	actgactgactgactgactgctgggtaggatgggcg	2
			gttagcagcggtgtgtgtgt	2
1189	T-C	161	gctaagacccaaactgggatt	2	L	54	tgactgactgactgactgactgactgactgactgagacctggcggtgcttcata	2
			cgattacagaacaggctcctc	2
1721	T-C	87	ccaaacccactccaccttact	2	L	25	caccttactaccagacaaccttagc	2
			gcgccaggtttcaatttcta	2
3010	G-A	179	caataacttgaccaacggaaca	1.5	L	21	gatgttggatcaggacatccc	2
			cggtctgaactcagatcacgta	1.5
5147	T-A		ctcaacttaaactccgcacca	4	H	44	gactgactgactgactgacttgggtttaagtcccattggtctag	2
			gagaggagggtggatggaa	4
5656	G-A	128	tcaactgaacgcaaatcagc	3	L	50	ctgactgactgactgactgactgactactcaacttaaactccagcaccac	2
			ggcgggagaagtagattgaa	3
7768	A-G	93	catatcagacgctcaggaaa	2	L	48	gactgactgactgactgactgactaacatctcagacgctcaggaaat	2
			taaaggatgcgtagggatgg	2
13879	T-A	191	tcactttcctaggacttctaacagc	4	H	54	ctgactgactgactgactgactgactgactagaaataaaatgtgcatagtgggg	2
			ggttaggtctaggaggagtaggg	4
9716	A-T	181	cgaaaccaaataattcaagcactg	3	H	32	gactgagaggcttgtaggagggtaaaatagag	2
			gaggaaagttgagccaataatga	3
14687	T-A	138	accccacaaaccccattact	2	H	36	gactgactgacttcatatcattggtcgtggttgtag	2
			ttggggtcattggtgttctt	2
14793	T-A	109	tcaactacaagaacaccaatgacc [1]	2	H	48	ctgactgactgactgactgactgactgaggggaggtcgatgaatgag	2
			atcatgcggagatgttggat [1]	2
14798	A-T	109	[1]	[1]	H	40	gactgactgactgactgactgggggtggggaggtcgatga	2
			[1]	[1]
15218	T-A	110	actatccgccatcccataca[2]	3	H	32	gactgaccctcagattcattgaactaggtctg	2
			gggcaagatgaagtgaaagg[2]	3
15257	C-G		[2]	[2]	H	40	gactgactgactgacgactttcgtgtgagggtgggactgt	2
			[2]	[2]
