# Supplementary material for: Uniparental Markers of Contemporary Italian Population Reveals Details on Its Pre-Roman Heritage
Source: PLoS One. 2012 Dec 10;7(12):e50794. doi: 10.1371/journal.pone.0050794 (PMC3519480; doi:10.1371/journal.pone.0050794)
Supplement: Table S2 — References to the population samples used in the present study for population comparison analysis. (XLS) [file pone.0050794.s002.xls]

## Sheet: Table S2_mtDNA
Table S2. Origin of the sample sizes used in the present study for mtDNA population comparison.
Continent	Continental Region	Sub-Region	Country	Population/Ethnic group	Sample Size	Reference
Africa	Northeast Africa	Northeast Africa	Egypt	Gurna	34	Stevanovitch A, Gilles A, Bouzaid E, Kefi R, Paris F, et al. (2004) Mitochondrial DNA sequence diversity in a sedentary population from Egypt. Ann Hum Genet 68: 23-39.
Africa	Northeast Africa	Northeast Africa	Egypt	Siwa; Berbers; oasis of Siwa	78	Coudray C, Olivieri A, Achilli A, Pala M, Melhaoui M, et al. (2009) The complex and diversified mitochondrial gene pool of berber populations. Ann Hum Genet 73: 196-214.
Africa	Northeast Africa	Northeast Africa	Egypt	Upper Egypt	24	Stevanovitch A, Gilles A, Bouzaid E, Kefi R, Paris F, et al. (2004) Mitochondrial DNA sequence diversity in a sedentary population from Egypt. Ann Hum Genet 68: 23-39.
Africa	Northeast Africa	Northeast Africa	Egypt	–	68	Krings M, Salem AH, Bauer K, Geisert H, Malek A, et al. (1999) mtDNA analysis of Nile River Valley populations: a genetic corridor or a barrier to migration? Am J Hum Genet 64: 1166-1176.
Africa	Northeast Africa	Northeast Africa	Egypt	–	48	Monson KL, Miller KWP, Wilson MR, DiZinno JA, Budowle B (2002) The mtDNA Population Database: an integrated software and database resource for forensic comparison. Forensic Sci Commun 4: no 2.
Africa	Northeast Africa	Northeast Africa	Egypt	–	277	Goios A, Pereira L, Bogue M, Macaulay V, Amorim A (2007) mtDNA phylogeny and evolution of laboratory mouse strains. Genome Res 17: 293-298.
Africa	Northeast Africa	Northeast Africa	Libya	Tuareg; Fezzan	129	Ottoni C, Martinez-Labarga C, Loogvali EL, Pennarun E, Achilli A, et al. (2009) First genetic insight into Libyan Tuaregs: a maternal perspective. Ann Hum Genet 73: 438-448.
Africa	Northwest Africa	Northwest Africa	Algeria	Ghardaia	86	Côrte-Real HBSM, Macaulay VA, Richards MB, Hariti G, Issad MS, et al. (1996) Genetic diversity in the Iberian peninsula determined from mitochondrial sequence analysis. Ann Hum Genet 60: 331-350.
Africa	Northwest Africa	Northwest Africa	Algeria	–	47	Plaza S, Calafell F, Helal A, Bouzerna N, Lefranc G, et al. (2003) Joining the pillars of Hercules: mtDNA sequences show multidirectional gene flow in the western Mediterranean. Ann Hum Genet 67: 312-328.
Africa	Northwest Africa	Northwest Africa	Mauritania	–	64	González AM, Brehm A, Pérez JA, Maca-Meyer N, Flores C, et al. (2003) Mitochondrial DNA affinities at the Atlantic fringe of Europe. Am J Phys Anthropol 120: 391-404.
Africa	Northwest Africa	Northwest Africa	Mauritania	–	30	Rando JC, Pinto F, González AM, Hernández M, Larruga JM, et al. (1998) Mitochondrial DNA analysis of northwest African populations reveals genetic exchanges with European, near-eastern, and sub-Saharan populations. Ann Hum Genet 62 ( Pt 6): 531-550.
Africa	Northwest Africa	Northwest Africa	Morocco	Al Hoceima; North	80	Rhouda T, Martinez-Redondo D, Gomez-Duran A, Elmtili N, Idaomar M, et al. (2009) Moroccan mitochondrial genetic background suggests prehistoric human migrations across the Gibraltar Strait. Mitochondrion 9: 402-407.
Africa	Northwest Africa	Northwest Africa	Morocco	Arabs	18	Plaza S, Calafell F, Helal A, Bouzerna N, Lefranc G, et al. (2003) Joining the pillars of Hercules: mtDNA sequences show multidirectional gene flow in the western Mediterranean. Ann Hum Genet 67: 312-328.
Africa	Northwest Africa	Northwest Africa	Morocco	Asni; Berbers	53	Coudray C, Olivieri A, Achilli A, Pala M, Melhaoui M, et al. (2009) The complex and diversified mitochondrial gene pool of berber populations. Ann Hum Genet 73: 196-214.
Africa	Northwest Africa	Northwest Africa	Morocco	Azilal; North	32	Rhouda T, Martinez-Redondo D, Gomez-Duran A, Elmtili N, Idaomar M, et al. (2009) Moroccan mitochondrial genetic background suggests prehistoric human migrations across the Gibraltar Strait. Mitochondrion 9: 402-407.
Africa	Northwest Africa	Northwest Africa	Morocco	Berber speaker	64	Rando JC, Pinto F, González AM, Hernández M, Larruga JM, et al. (1998) Mitochondrial DNA analysis of northwest African populations reveals genetic exchanges with European, near-eastern, and sub-Saharan populations. Ann Hum Genet 62 ( Pt 6): 531-550.
Africa	Northwest Africa	Northwest Africa	Morocco	Berbers	64	Plaza S, Calafell F, Helal A, Bouzerna N, Lefranc G, et al. (2003) Joining the pillars of Hercules: mtDNA sequences show multidirectional gene flow in the western Mediterranean. Ann Hum Genet 67: 312-328.
Africa	Northwest Africa	Northwest Africa	Morocco	Bouhria; Berbers	70	Coudray C, Olivieri A, Achilli A, Pala M, Melhaoui M, et al. (2009) The complex and diversified mitochondrial gene pool of berber populations. Ann Hum Genet 73: 196-214.
Africa	Northwest Africa	Northwest Africa	Morocco	Chefchaouen; North	34	Rhouda T, Martinez-Redondo D, Gomez-Duran A, Elmtili N, Idaomar M, et al. (2009) Moroccan mitochondrial genetic background suggests prehistoric human migrations across the Gibraltar Strait. Mitochondrion 9: 402-407.
Africa	Northwest Africa	Northwest Africa	Morocco	El Jadida	81	Harich N, Costa MD, Fernandes V, Kandil M, Pereira JB, et al. (2010) The trans-Saharan slave trade - clues from interpolation analyses and high-resolution characterization of mitochondrial DNA lineages. BMC Evol Biol 10: 138.
Africa	Northwest Africa	Northwest Africa	Morocco	Figuig; Berbers	94	Coudray C, Olivieri A, Achilli A, Pala M, Melhaoui M, et al. (2009) The complex and diversified mitochondrial gene pool of berber populations. Ann Hum Genet 73: 196-214.
Africa	Northwest Africa	Northwest Africa	Morocco	Marrakech	52	Falchi A, Giovannoni L, Calo CM, Piras IS, Moral P, et al. (2006) Genetic history of some western Mediterranean human isolates through mtDNA HVR1 polymorphisms. J Hum Genet 51: 9-14.
Africa	Northwest Africa	Northwest Africa	Morocco	–	312	Álvarez JC, Johnson DE, Lorente JA, Martínez-espin E, Martínez-González LJ, et al. (2007) Characterization of human control region sequences for Spanish individuals in a forensic mtDNA data set. Legal Med 9: 293-304.
Africa	Northwest Africa	Northwest Africa	Morocco	–	56	Turchi C, Buscemi L, Giacchino E, Onofri V, Fendt L, et al. (2009) Polymorphisms of mtDNA control region in Tunisian and Moroccan populations: an enrichment of forensic mtDNA databases with Northern Africa data. Forensic Sci Int Genet 3: 166-172.
Africa	Northwest Africa	Northwest Africa	Morocco	non-Berber speaker	32	Rando JC, Pinto F, González AM, Hernández M, Larruga JM, et al. (1998) Mitochondrial DNA analysis of northwest African populations reveals genetic exchanges with European, near-eastern, and sub-Saharan populations. Ann Hum Genet 62 ( Pt 6): 531-550.
Africa	Northwest Africa	Northwest Africa	Morocco	Oujda; North	193	Rhouda T, Martinez-Redondo D, Gomez-Duran A, Elmtili N, Idaomar M, et al. (2009) Moroccan mitochondrial genetic background suggests prehistoric human migrations across the Gibraltar Strait. Mitochondrion 9: 402-407.
Africa	Northwest Africa	Northwest Africa	Morocco	Souss Valley	50	Brakez Z, Bosch E, Izaabel H, Akhayat O, Comas D, et al. (2001) Human mitochondrial DNA sequence variation in the Moroccan population of the Souss area. Ann Hum Biol 28: 295-307.
Africa	Northwest Africa	Northwest Africa	Morocco	Tetouan; North	217	Rhouda T, Martinez-Redondo D, Gomez-Duran A, Elmtili N, Idaomar M, et al. (2009) Moroccan mitochondrial genetic background suggests prehistoric human migrations across the Gibraltar Strait. Mitochondrion 9: 402-407.
Africa	Northwest Africa	Northwest Africa	Morocco	Tetouan; North	218	Rhouda T, Martinez-Redondo D, Gomez-Duran A, Elmtili N, Idaomar M, et al. (2009) Moroccan mitochondrial genetic background suggests prehistoric human migrations across the Gibraltar Strait. Mitochondrion 9: 402-407.
Africa	Northwest Africa	Northwest Africa	Niger/Mali/Algeria	Tuareg	23	Watson E, Forster P, Richards M, Bandelt H-J (1997) Mitochondrial footprints of human expansions in Africa. Am J Hum Genet 61: 691-704.
Africa	Northwest Africa	Northwest Africa	Portugal	Madeira	155	Brehm A, Pereira L, Kivisild T, Amorim A (2003) Mitochondrial portraits of the Madeira and Acores archipelagos witness different genetic pools of its settlers. Hum Genet 114: 77-86.
Africa	Northwest Africa	Northwest Africa	Spain	Canary Islands	8	Álvarez JC, Johnson DE, Lorente JA, Martínez-espin E, Martínez-González LJ, et al. (2007) Characterization of human control region sequences for Spanish individuals in a forensic mtDNA data set. Legal Med 9: 293-304.
Africa	Northwest Africa	Northwest Africa	Spain	Canary Islands	300	Rando JC, Cabrera VM, Larruga JM, Hernández M, González AM, et al. (1999) Phylogeographic patterns of mtDNA reflecting the colonization of the Canary Islands. Ann Hum Genet 63: 413-428.
Africa	Northwest Africa	Northwest Africa	Tunisia	Berbers, Matmata	49	Bert F, Corella A, Gene M, Perez-Perez A, Turbon D (2004) Mitochondrial DNA diversity in the Llanos de Moxos: Moxo, Movima and Yuracare Amerindian populations from Bolivia lowlands. Ann Hum Biol 31: 9-28.
Africa	Northwest Africa	Northwest Africa	Tunisia	Berbers; Chenini	53	Bert F, Corella A, Gene M, Perez-Perez A, Turbon D (2004) Mitochondrial DNA diversity in the Llanos de Moxos: Moxo, Movima and Yuracare Amerindian populations from Bolivia lowlands. Ann Hum Biol 31: 9-28.
Africa	Northwest Africa	Northwest Africa	Tunisia	Berbers; Sened	53	Bert F, Corella A, Gene M, Perez-Perez A, Turbon D (2004) Mitochondrial DNA diversity in the Llanos de Moxos: Moxo, Movima and Yuracare Amerindian populations from Bolivia lowlands. Ann Hum Biol 31: 9-28.
Africa	Northwest Africa	Northwest Africa	Tunisia	El Alia; Andalucian communities	48	Cherni L, Fernandes V, Pereira JB, Costa MD, Goios A, et al. (2009) Post-last glacial maximum expansion from Iberia to North Africa revealed by fine characterization of mtDNA H haplogroup in Tunisia. Am J Phys Anthropol: 253–260.
Africa	Northwest Africa	Northwest Africa	Tunisia	Kesra Berbers	42	Cherni L, Fernandes V, Pereira JB, Costa MD, Goios A, et al. (2009) Post-last glacial maximum expansion from Iberia to North Africa revealed by fine characterization of mtDNA H haplogroup in Tunisia. Am J Phys Anthropol: 253–260.
Africa	Northwest Africa	Northwest Africa	Tunisia	Kesra Berbers	43	Cherni L, Fernandes V, Pereira JB, Costa MD, Goios A, et al. (2009) Post-last glacial maximum expansion from Iberia to North Africa revealed by fine characterization of mtDNA H haplogroup in Tunisia. Am J Phys Anthropol: 253–260.
Africa	Northwest Africa	Northwest Africa	Tunisia	Qalaat El Andalous; Andalucian communities	29	Cherni L, Fernandes V, Pereira JB, Costa MD, Goios A, et al. (2009) Post-last glacial maximum expansion from Iberia to North Africa revealed by fine characterization of mtDNA H haplogroup in Tunisia. Am J Phys Anthropol: 253–260.
Africa	Northwest Africa	Northwest Africa	Tunisia	Skira Berbers	20	Cherni L, Fernandes V, Pereira JB, Costa MD, Goios A, et al. (2009) Post-last glacial maximum expansion from Iberia to North Africa revealed by fine characterization of mtDNA H haplogroup in Tunisia. Am J Phys Anthropol: 253–260.
Africa	Northwest Africa	Northwest Africa	Tunisia	Slouguia; Andalucian communities	28	Cherni L, Fernandes V, Pereira JB, Costa MD, Goios A, et al. (2009) Post-last glacial maximum expansion from Iberia to North Africa revealed by fine characterization of mtDNA H haplogroup in Tunisia. Am J Phys Anthropol: 253–260.
Africa	Northwest Africa	Northwest Africa	Tunisia	Testour; Andalucian communities	50	Cherni L, Fernandes V, Pereira JB, Costa MD, Goios A, et al. (2009) Post-last glacial maximum expansion from Iberia to North Africa revealed by fine characterization of mtDNA H haplogroup in Tunisia. Am J Phys Anthropol: 253–260.
Africa	Northwest Africa	Northwest Africa	Tunisia	Tunis	51	Cherni L, Fernandes V, Pereira JB, Costa MD, Goios A, et al. (2009) Post-last glacial maximum expansion from Iberia to North Africa revealed by fine characterization of mtDNA H haplogroup in Tunisia. Am J Phys Anthropol: 253–260.
Africa	Northwest Africa	Northwest Africa	Tunisia	Tunisia	64	Turchi C, Buscemi L, Giacchino E, Onofri V, Fendt L, et al. (2009) Polymorphisms of mtDNA control region in Tunisian and Moroccan populations: an enrichment of forensic mtDNA databases with Northern Africa data. Forensic Sci Int Genet 3: 166-172.
Africa	Northwest Africa	Northwest Africa	Tunisia	Zriba Arabs	35	Cherni L, Fernandes V, Pereira JB, Costa MD, Goios A, et al. (2009) Post-last glacial maximum expansion from Iberia to North Africa revealed by fine characterization of mtDNA H haplogroup in Tunisia. Am J Phys Anthropol: 253–260.
Africa	Northwest Africa	Northwest Africa	Tunisia	–	46	Plaza S, Calafell F, Helal A, Bouzerna N, Lefranc G, et al. (2003) Joining the pillars of Hercules: mtDNA sequences show multidirectional gene flow in the western Mediterranean. Ann Hum Genet 67: 312-328.
Africa	Northwest Africa	Northwest Africa	Tunisia	–	47	Plaza S, Calafell F, Helal A, Bouzerna N, Lefranc G, et al. (2003) Joining the pillars of Hercules: mtDNA sequences show multidirectional gene flow in the western Mediterranean. Ann Hum Genet 67: 312-328.
Africa	Northwest Africa	Northwest Africa	Western Sahara	Saharawi	56	Plaza S, Calafell F, Helal A, Bouzerna N, Lefranc G, et al. (2003) Joining the pillars of Hercules: mtDNA sequences show multidirectional gene flow in the western Mediterranean. Ann Hum Genet 67: 312-328.
Africa	Northwest Africa	Northwest Africa	Western Sahara	–	25	Rando JC, Pinto F, González AM, Hernández M, Larruga JM, et al. (1998) Mitochondrial DNA analysis of northwest African populations reveals genetic exchanges with European, near-eastern, and sub-Saharan populations. Ann Hum Genet 62 ( Pt 6): 531-550.
Africa	Sub-Sahara	Southwest Africa	Angola	–	3	Richards M, Côrte-Real H, Forster P, Macaulay V, Wilkinson-Herbots H, et al. (1996) Paleolithic and neolithic lineages in the European mitochondrial gene pool. Am J Hum Genet 59: 185-203.
Africa	Sub-Sahara	Southwest Africa	Angola	Ganguela, southwestern	21	Coelho M, Sequeira F, Luiselli D, Beleza S, Rocha J (2009) On the edge of Bantu expansions: mtDNA, Y chromosome and lactase persistence genetic variation in southwestern Angola. BMC Evol Biol 9: 80.
Africa	Sub-Sahara	Southwest Africa	Angola	Kuvale, southwestern	54	Coelho M, Sequeira F, Luiselli D, Beleza S, Rocha J (2009) On the edge of Bantu expansions: mtDNA, Y chromosome and lactase persistence genetic variation in southwestern Angola. BMC Evol Biol 9: 80.
Africa	Sub-Sahara	Southwest Africa	Angola	Mbundu	44	Plaza S, Salas A, Calafell F, Corte-Real F, Bertranpetit J, et al. (2004) Insights into the western Bantu dispersal: mtDNA lineage analysis in Angola. Hum Genet 115: 439-447.
Africa	Sub-Sahara	Southwest Africa	Angola	Nyaneka-Nkhumbi; southwestern	153	Coelho M, Sequeira F, Luiselli D, Beleza S, Rocha J (2009) On the edge of Bantu expansions: mtDNA, Y chromosome and lactase persistence genetic variation in southwestern Angola. BMC Evol Biol 9: 80.
Africa	Sub-Sahara	Southwest Africa	Angola	Ovimbundu, southwestern	92	Coelho M, Sequeira F, Luiselli D, Beleza S, Rocha J (2009) On the edge of Bantu expansions: mtDNA, Y chromosome and lactase persistence genetic variation in southwestern Angola. BMC Evol Biol 9: 80.
Africa	Sub-Sahara	Southwest Africa	Angola	–	45	Coelho M, Sequeira F, Luiselli D, Beleza S, Rocha J (2009) On the edge of Bantu expansions: mtDNA, Y chromosome and lactase persistence genetic variation in southwestern Angola. BMC Evol Biol 9: 80.
Africa	Sub-Sahara	Gold Coast	Benin	Adja	8	Brucato N, Cassar O, Tonasso L, Tortevoye P, Migot-Nabias F, et al. (2010) The imprint of the Slave Trade in an African American population: mitochondrial DNA, Y chromosome and HTLV-1 analysis in the Noir Marron of French Guiana. BMC Evol Biol 10: 314.
Africa	Sub-Sahara	Gold Coast	Benin	Adja DahÞ	1	Brucato N, Cassar O, Tonasso L, Tortevoye P, Migot-Nabias F, et al. (2010) The imprint of the Slave Trade in an African American population: mitochondrial DNA, Y chromosome and HTLV-1 analysis in the Noir Marron of French Guiana. BMC Evol Biol 10: 314.
Africa	Sub-Sahara	Gold Coast	Benin	Aïzo	11	Brucato N, Cassar O, Tonasso L, Tortevoye P, Migot-Nabias F, et al. (2010) The imprint of the Slave Trade in an African American population: mitochondrial DNA, Y chromosome and HTLV-1 analysis in the Noir Marron of French Guiana. BMC Evol Biol 10: 314.
Africa	Sub-Sahara	Gold Coast	Benin	Ani	1	Brucato N, Cassar O, Tonasso L, Tortevoye P, Migot-Nabias F, et al. (2010) The imprint of the Slave Trade in an African American population: mitochondrial DNA, Y chromosome and HTLV-1 analysis in the Noir Marron of French Guiana. BMC Evol Biol 10: 314.
Africa	Sub-Sahara	Gold Coast	Benin	Baoulé	1	Brucato N, Cassar O, Tonasso L, Tortevoye P, Migot-Nabias F, et al. (2010) The imprint of the Slave Trade in an African American population: mitochondrial DNA, Y chromosome and HTLV-1 analysis in the Noir Marron of French Guiana. BMC Evol Biol 10: 314.
Africa	Sub-Sahara	Gold Coast	Benin	Bassila	1	Brucato N, Cassar O, Tonasso L, Tortevoye P, Migot-Nabias F, et al. (2010) The imprint of the Slave Trade in an African American population: mitochondrial DNA, Y chromosome and HTLV-1 analysis in the Noir Marron of French Guiana. BMC Evol Biol 10: 314.
Africa	Sub-Sahara	Gold Coast	Benin	Bopa	1	Brucato N, Cassar O, Tonasso L, Tortevoye P, Migot-Nabias F, et al. (2010) The imprint of the Slave Trade in an African American population: mitochondrial DNA, Y chromosome and HTLV-1 analysis in the Noir Marron of French Guiana. BMC Evol Biol 10: 314.
Africa	Sub-Sahara	Gold Coast	Benin	Burkinabè	1	Brucato N, Cassar O, Tonasso L, Tortevoye P, Migot-Nabias F, et al. (2010) The imprint of the Slave Trade in an African American population: mitochondrial DNA, Y chromosome and HTLV-1 analysis in the Noir Marron of French Guiana. BMC Evol Biol 10: 314.
Africa	Sub-Sahara	Gold Coast	Benin	DahÞ	2	Brucato N, Cassar O, Tonasso L, Tortevoye P, Migot-Nabias F, et al. (2010) The imprint of the Slave Trade in an African American population: mitochondrial DNA, Y chromosome and HTLV-1 analysis in the Noir Marron of French Guiana. BMC Evol Biol 10: 314.
Africa	Sub-Sahara	Gold Coast	Benin	Dendi	1	Brucato N, Cassar O, Tonasso L, Tortevoye P, Migot-Nabias F, et al. (2010) The imprint of the Slave Trade in an African American population: mitochondrial DNA, Y chromosome and HTLV-1 analysis in the Noir Marron of French Guiana. BMC Evol Biol 10: 314.
Africa	Sub-Sahara	Gold Coast	Benin	Ewú	1	Brucato N, Cassar O, Tonasso L, Tortevoye P, Migot-Nabias F, et al. (2010) The imprint of the Slave Trade in an African American population: mitochondrial DNA, Y chromosome and HTLV-1 analysis in the Noir Marron of French Guiana. BMC Evol Biol 10: 314.
Africa	Sub-Sahara	Gold Coast	Benin	Fon	79	Brucato N, Cassar O, Tonasso L, Tortevoye P, Migot-Nabias F, et al. (2010) The imprint of the Slave Trade in an African American population: mitochondrial DNA, Y chromosome and HTLV-1 analysis in the Noir Marron of French Guiana. BMC Evol Biol 10: 314.
Africa	Sub-Sahara	Gold Coast	Benin	Goun	11	Brucato N, Cassar O, Tonasso L, Tortevoye P, Migot-Nabias F, et al. (2010) The imprint of the Slave Trade in an African American population: mitochondrial DNA, Y chromosome and HTLV-1 analysis in the Noir Marron of French Guiana. BMC Evol Biol 10: 314.
Africa	Sub-Sahara	Gold Coast	Benin	Haoussa	2	Brucato N, Cassar O, Tonasso L, Tortevoye P, Migot-Nabias F, et al. (2010) The imprint of the Slave Trade in an African American population: mitochondrial DNA, Y chromosome and HTLV-1 analysis in the Noir Marron of French Guiana. BMC Evol Biol 10: 314.
Africa	Sub-Sahara	Gold Coast	Benin	Heviú	1	Brucato N, Cassar O, Tonasso L, Tortevoye P, Migot-Nabias F, et al. (2010) The imprint of the Slave Trade in an African American population: mitochondrial DNA, Y chromosome and HTLV-1 analysis in the Noir Marron of French Guiana. BMC Evol Biol 10: 314.
Africa	Sub-Sahara	Gold Coast	Benin	Houúda	2	Brucato N, Cassar O, Tonasso L, Tortevoye P, Migot-Nabias F, et al. (2010) The imprint of the Slave Trade in an African American population: mitochondrial DNA, Y chromosome and HTLV-1 analysis in the Noir Marron of French Guiana. BMC Evol Biol 10: 314.
Africa	Sub-Sahara	Gold Coast	Benin	Mahi	1	Brucato N, Cassar O, Tonasso L, Tortevoye P, Migot-Nabias F, et al. (2010) The imprint of the Slave Trade in an African American population: mitochondrial DNA, Y chromosome and HTLV-1 analysis in the Noir Marron of French Guiana. BMC Evol Biol 10: 314.
Africa	Sub-Sahara	Gold Coast	Benin	Mina	4	Brucato N, Cassar O, Tonasso L, Tortevoye P, Migot-Nabias F, et al. (2010) The imprint of the Slave Trade in an African American population: mitochondrial DNA, Y chromosome and HTLV-1 analysis in the Noir Marron of French Guiana. BMC Evol Biol 10: 314.
Africa	Sub-Sahara	Gold Coast	Benin	Misc.	4	Brucato N, Cassar O, Tonasso L, Tortevoye P, Migot-Nabias F, et al. (2010) The imprint of the Slave Trade in an African American population: mitochondrial DNA, Y chromosome and HTLV-1 analysis in the Noir Marron of French Guiana. BMC Evol Biol 10: 314.
Africa	Sub-Sahara	Gold Coast	Benin	Nago	5	Brucato N, Cassar O, Tonasso L, Tortevoye P, Migot-Nabias F, et al. (2010) The imprint of the Slave Trade in an African American population: mitochondrial DNA, Y chromosome and HTLV-1 analysis in the Noir Marron of French Guiana. BMC Evol Biol 10: 314.
Africa	Sub-Sahara	Gold Coast	Benin	Natimba	1	Brucato N, Cassar O, Tonasso L, Tortevoye P, Migot-Nabias F, et al. (2010) The imprint of the Slave Trade in an African American population: mitochondrial DNA, Y chromosome and HTLV-1 analysis in the Noir Marron of French Guiana. BMC Evol Biol 10: 314.
Africa	Sub-Sahara	Gold Coast	Benin	Peda	1	Brucato N, Cassar O, Tonasso L, Tortevoye P, Migot-Nabias F, et al. (2010) The imprint of the Slave Trade in an African American population: mitochondrial DNA, Y chromosome and HTLV-1 analysis in the Noir Marron of French Guiana. BMC Evol Biol 10: 314.
Africa	Sub-Sahara	Gold Coast	Benin	Peul	1	Brucato N, Cassar O, Tonasso L, Tortevoye P, Migot-Nabias F, et al. (2010) The imprint of the Slave Trade in an African American population: mitochondrial DNA, Y chromosome and HTLV-1 analysis in the Noir Marron of French Guiana. BMC Evol Biol 10: 314.
Africa	Sub-Sahara	Gold Coast	Benin	SahouÞ	1	Brucato N, Cassar O, Tonasso L, Tortevoye P, Migot-Nabias F, et al. (2010) The imprint of the Slave Trade in an African American population: mitochondrial DNA, Y chromosome and HTLV-1 analysis in the Noir Marron of French Guiana. BMC Evol Biol 10: 314.
Africa	Sub-Sahara	Gold Coast	Benin	Savú	1	Brucato N, Cassar O, Tonasso L, Tortevoye P, Migot-Nabias F, et al. (2010) The imprint of the Slave Trade in an African American population: mitochondrial DNA, Y chromosome and HTLV-1 analysis in the Noir Marron of French Guiana. BMC Evol Biol 10: 314.
Africa	Sub-Sahara	Gold Coast	Benin	Tofin	5	Brucato N, Cassar O, Tonasso L, Tortevoye P, Migot-Nabias F, et al. (2010) The imprint of the Slave Trade in an African American population: mitochondrial DNA, Y chromosome and HTLV-1 analysis in the Noir Marron of French Guiana. BMC Evol Biol 10: 314.
Africa	Sub-Sahara	Gold Coast	Benin	Vúdo	1	Brucato N, Cassar O, Tonasso L, Tortevoye P, Migot-Nabias F, et al. (2010) The imprint of the Slave Trade in an African American population: mitochondrial DNA, Y chromosome and HTLV-1 analysis in the Noir Marron of French Guiana. BMC Evol Biol 10: 314.
Africa	Sub-Sahara	Gold Coast	Benin	Wla	2	Brucato N, Cassar O, Tonasso L, Tortevoye P, Migot-Nabias F, et al. (2010) The imprint of the Slave Trade in an African American population: mitochondrial DNA, Y chromosome and HTLV-1 analysis in the Noir Marron of French Guiana. BMC Evol Biol 10: 314.
Africa	Sub-Sahara	Gold Coast	Benin	Yoruba	2	Brucato N, Cassar O, Tonasso L, Tortevoye P, Migot-Nabias F, et al. (2010) The imprint of the Slave Trade in an African American population: mitochondrial DNA, Y chromosome and HTLV-1 analysis in the Noir Marron of French Guiana. BMC Evol Biol 10: 314.
Africa	Sub-Sahara	South Africa	Botswana	!Kung	25	Vigilant L, Pennington R, Harpending H, Kocher TD, Wilson AC (1989) Mitochondria DNA sequences in single hairs from a southern African population. Proc Natl Acad Sci U S A 86: 9350-9354.
Africa	Sub-Sahara	South Africa	Botswana	Herero	27	Vigilant L, Pennington R, Harpending H, Kocher TD, Wilson AC (1989) Mitochondria DNA sequences in single hairs from a southern African population. Proc Natl Acad Sci U S A 86: 9350-9354.
Africa	Sub-Sahara	South Africa	Botswana	Herero	21	Vigilant L, Pennington R, Harpending H, Kocher TD, Wilson AC (1989) Mitochondria DNA sequences in single hairs from a southern African population. Proc Natl Acad Sci U S A 86: 9350-9354.
Africa	Sub-Sahara	South Africa	Botswana	–	15	Vigilant L, Pennington R, Harpending H, Kocher TD, Wilson AC (1989) Mitochondria DNA sequences in single hairs from a southern African population. Proc Natl Acad Sci U S A 86: 9350-9354.
Africa	Sub-Sahara	Gold Coast	Burkina Faso	Fulani Banfora	50	Černý V, Hájek M, Bromova M, Cmejla R, Diallo I, et al. (2006) MtDNA of Fulani nomads and their genetic relationships to neighboring sedentary populations. Hum Biol 78: 9-27.
Africa	Sub-Sahara	Gold Coast	Burkina Faso	Fulani Tindangou	47	Černý V, Hájek M, Bromova M, Cmejla R, Diallo I, et al. (2006) MtDNA of Fulani nomads and their genetic relationships to neighboring sedentary populations. Hum Biol 78: 9-27.
Africa	Sub-Sahara	Gold Coast	Burkina Faso	Tuareg; Imazagan; GoromûGorom	38	Pereira L, Černý V, Cerezo M, Silva NM, Hájek M, et al. (2010) Linking the sub-Saharan and West Eurasian gene pools: maternal and paternal heritage of the Tuareg nomads from the African Sahel. Eur J Hum Genet 18: 915-923.
Africa	Sub-Sahara	Southwest Africa	Cabinda	–	110	Beleza S, Gusmão L, Amorim A, Carracedo Á, Salas A (2005) The genetic legacy of western Bantu migrations. Hum Genet 117: 366-375.
Africa	Sub-Sahara	Bight of Biafra	Cameroon	Baka pygmies	50	Batini C, Coia V, Battaggia C, Rocha J, Pilkington MM, et al. (2007) Phylogeography of the human mitochondrial L1c haplogroup: genetic signatures of the prehistory of Central Africa. Mol Phylogenet Evol 43: 635-644.
Africa	Sub-Sahara	Bight of Biafra	Cameroon	Baka; Centre	8	Quintana-Murci L, Quach H, Harmant C, Luca F, Massonnet B, et al. (2008) Maternal traces of deep common ancestry and asymmetric gene flow between Pygmy hunter-gatherers and Bantu-speaking farmers. Proc Natl Acad Sci U S A 105: 1596-1601.
Africa	Sub-Sahara	Bight of Biafra	Cameroon	Baka; Southwest	21	Quintana-Murci L, Quach H, Harmant C, Luca F, Massonnet B, et al. (2008) Maternal traces of deep common ancestry and asymmetric gene flow between Pygmy hunter-gatherers and Bantu-speaking farmers. Proc Natl Acad Sci U S A 105: 1596-1601.
Africa	Sub-Sahara	Bight of Biafra	Cameroon	Baka-CC	22	Quintana-Murci L, Quach H, Harmant C, Luca F, Massonnet B, et al. (2008) Maternal traces of deep common ancestry and asymmetric gene flow between Pygmy hunter-gatherers and Bantu-speaking farmers. Proc Natl Acad Sci U S A 105: 1596-1601.
Africa	Sub-Sahara	Bight of Biafra	Cameroon	Baka-CW	37	Quintana-Murci L, Quach H, Harmant C, Luca F, Massonnet B, et al. (2008) Maternal traces of deep common ancestry and asymmetric gene flow between Pygmy hunter-gatherers and Bantu-speaking farmers. Proc Natl Acad Sci U S A 105: 1596-1601.
Africa	Sub-Sahara	Bight of Biafra	Cameroon	Bakaka; southern	50	Coia V, Destro-Bisol G, Verginelli F, Battaggia C, Boschi I, et al. (2005) Brief communication: mtDNA variation in North Cameroon: lack of Asian lineages and implications for back migration from Asia to sub-Saharan Africa. Am J Phys Anthropol 128: 678-681.
Africa	Sub-Sahara	Bight of Biafra	Cameroon	Bakola	88	Quintana-Murci L, Quach H, Harmant C, Luca F, Massonnet B, et al. (2008) Maternal traces of deep common ancestry and asymmetric gene flow between Pygmy hunter-gatherers and Bantu-speaking farmers. Proc Natl Acad Sci U S A 105: 1596-1601.
Africa	Sub-Sahara	Bight of Biafra	Cameroon	Bakola pygmies	49	Batini C, Coia V, Battaggia C, Rocha J, Pilkington MM, et al. (2007) Phylogeography of the human mitochondrial L1c haplogroup: genetic signatures of the prehistory of Central Africa. Mol Phylogenet Evol 43: 635-644.
Africa	Sub-Sahara	Bight of Biafra	Cameroon	Bamileke; southern	47	Coia V, Destro-Bisol G, Verginelli F, Battaggia C, Boschi I, et al. (2005) Brief communication: mtDNA variation in North Cameroon: lack of Asian lineages and implications for back migration from Asia to sub-Saharan Africa. Am J Phys Anthropol 128: 678-681.
Africa	Sub-Sahara	Bight of Biafra	Cameroon	Bamileke; southern	48	Coia V, Destro-Bisol G, Verginelli F, Battaggia C, Boschi I, et al. (2005) Brief communication: mtDNA variation in North Cameroon: lack of Asian lineages and implications for back migration from Asia to sub-Saharan Africa. Am J Phys Anthropol 128: 678-681.
Africa	Sub-Sahara	Bight of Biafra	Cameroon	Bankim	34	Veeramah KR, Connell BA, Pour NA, Powell A, Plaster CA, et al. (2010) Little genetic differentiation as assessed by uniparental markers in the presence of substantial language variation in peoples of the Cross River region of Nigeria. BMC Evol Biol 10: 92.
Africa	Sub-Sahara	Bight of Biafra	Cameroon	Bassa; south	46	Coia V, Destro-Bisol G, Verginelli F, Battaggia C, Boschi I, et al. (2005) Brief communication: mtDNA variation in North Cameroon: lack of Asian lineages and implications for back migration from Asia to sub-Saharan Africa. Am J Phys Anthropol 128: 678-681.
Africa	Sub-Sahara	Bight of Biafra	Cameroon	Daba; northern	20	Coia V, Destro-Bisol G, Verginelli F, Battaggia C, Boschi I, et al. (2005) Brief communication: mtDNA variation in North Cameroon: lack of Asian lineages and implications for back migration from Asia to sub-Saharan Africa. Am J Phys Anthropol 128: 678-681.
Africa	Sub-Sahara	Bight of Biafra	Cameroon	Ewondo	53	Coia V, Destro-Bisol G, Verginelli F, Battaggia C, Boschi I, et al. (2005) Brief communication: mtDNA variation in North Cameroon: lack of Asian lineages and implications for back migration from Asia to sub-Saharan Africa. Am J Phys Anthropol 128: 678-681.
Africa	Sub-Sahara	Bight of Biafra	Cameroon	Ewondo	25	Quintana-Murci L, Quach H, Harmant C, Luca F, Massonnet B, et al. (2008) Maternal traces of deep common ancestry and asymmetric gene flow between Pygmy hunter-gatherers and Bantu-speaking farmers. Proc Natl Acad Sci U S A 105: 1596-1601.
Africa	Sub-Sahara	Bight of Biafra	Cameroon	Fali	40	Černý V, Salas A, Hájek M, Žaloudková M, Brdička R (2007) A bidirectional corridor in the Sahel-Sudan belt and the distinctive features of the Chad Basin populations: a history revealed by the mitochondrial DNA genome. Ann Hum Genet 71: 433-452.
Africa	Sub-Sahara	Bight of Biafra	Cameroon	Fali; northern	41	Coia V, Destro-Bisol G, Verginelli F, Battaggia C, Boschi I, et al. (2005) Brief communication: mtDNA variation in North Cameroon: lack of Asian lineages and implications for back migration from Asia to sub-Saharan Africa. Am J Phys Anthropol 128: 678-681.
Africa	Sub-Sahara	Bight of Biafra	Cameroon	Fang; South	10	Quintana-Murci L, Quach H, Harmant C, Luca F, Massonnet B, et al. (2008) Maternal traces of deep common ancestry and asymmetric gene flow between Pygmy hunter-gatherers and Bantu-speaking farmers. Proc Natl Acad Sci U S A 105: 1596-1601.
Africa	Sub-Sahara	Bight of Biafra	Cameroon	Fang-CM	29	Quintana-Murci L, Quach H, Harmant C, Luca F, Massonnet B, et al. (2008) Maternal traces of deep common ancestry and asymmetric gene flow between Pygmy hunter-gatherers and Bantu-speaking farmers. Proc Natl Acad Sci U S A 105: 1596-1601.
Africa	Sub-Sahara	Bight of Biafra	Cameroon	Foumban	107	Veeramah KR, Connell BA, Pour NA, Powell A, Plaster CA, et al. (2010) Little genetic differentiation as assessed by uniparental markers in the presence of substantial language variation in peoples of the Cross River region of Nigeria. BMC Evol Biol 10: 92.
Africa	Sub-Sahara	Bight of Biafra	Cameroon	Fulani Tcheboua	40	Černý V, Salas A, Hájek M, Žaloudková M, Brdička R (2007) A bidirectional corridor in the Sahel-Sudan belt and the distinctive features of the Chad Basin populations: a history revealed by the mitochondrial DNA genome. Ann Hum Genet 71: 433-452.
Africa	Sub-Sahara	Bight of Biafra	Cameroon	Fulbe; northern	34	Coia V, Destro-Bisol G, Verginelli F, Battaggia C, Boschi I, et al. (2005) Brief communication: mtDNA variation in North Cameroon: lack of Asian lineages and implications for back migration from Asia to sub-Saharan Africa. Am J Phys Anthropol 128: 678-681.
Africa	Sub-Sahara	Bight of Biafra	Cameroon	Mandara; north	37	Coia V, Destro-Bisol G, Verginelli F, Battaggia C, Boschi I, et al. (2005) Brief communication: mtDNA variation in North Cameroon: lack of Asian lineages and implications for back migration from Asia to sub-Saharan Africa. Am J Phys Anthropol 128: 678-681.
Africa	Sub-Sahara	Bight of Biafra	Cameroon	Ngoumba	44	Batini C, Coia V, Battaggia C, Rocha J, Pilkington MM, et al. (2007) Phylogeography of the human mitochondrial L1c haplogroup: genetic signatures of the prehistory of Central Africa. Mol Phylogenet Evol 43: 635-644.
Africa	Sub-Sahara	Bight of Biafra	Cameroon	Ngumba	88	Quintana-Murci L, Quach H, Harmant C, Luca F, Massonnet B, et al. (2008) Maternal traces of deep common ancestry and asymmetric gene flow between Pygmy hunter-gatherers and Bantu-speaking farmers. Proc Natl Acad Sci U S A 105: 1596-1601.
Africa	Sub-Sahara	Bight of Biafra	Cameroon	Ouldeme; northern	28	Coia V, Destro-Bisol G, Verginelli F, Battaggia C, Boschi I, et al. (2005) Brief communication: mtDNA variation in North Cameroon: lack of Asian lineages and implications for back migration from Asia to sub-Saharan Africa. Am J Phys Anthropol 128: 678-681.
Africa	Sub-Sahara	Bight of Biafra	Cameroon	Podokwo; north	39	Coia V, Destro-Bisol G, Verginelli F, Battaggia C, Boschi I, et al. (2005) Brief communication: mtDNA variation in North Cameroon: lack of Asian lineages and implications for back migration from Asia to sub-Saharan Africa. Am J Phys Anthropol 128: 678-681.
Africa	Sub-Sahara	Bight of Biafra	Cameroon	Tali; northern	20	Coia V, Destro-Bisol G, Verginelli F, Battaggia C, Boschi I, et al. (2005) Brief communication: mtDNA variation in North Cameroon: lack of Asian lineages and implications for back migration from Asia to sub-Saharan Africa. Am J Phys Anthropol 128: 678-681.
Africa	Sub-Sahara	Bight of Biafra	Cameroon	Tigar; West	35	Quintana-Murci L, Quach H, Harmant C, Luca F, Massonnet B, et al. (2008) Maternal traces of deep common ancestry and asymmetric gene flow between Pygmy hunter-gatherers and Bantu-speaking farmers. Proc Natl Acad Sci U S A 105: 1596-1601.
Africa	Sub-Sahara	Bight of Biafra	Cameroon	Tupuri; north	25	Coia V, Destro-Bisol G, Verginelli F, Battaggia C, Boschi I, et al. (2005) Brief communication: mtDNA variation in North Cameroon: lack of Asian lineages and implications for back migration from Asia to sub-Saharan Africa. Am J Phys Anthropol 128: 678-681.
Africa	Sub-Sahara	Bight of Biafra	Cameroon	Wum	115	Veeramah KR, Connell BA, Pour NA, Powell A, Plaster CA, et al. (2010) Little genetic differentiation as assessed by uniparental markers in the presence of substantial language variation in peoples of the Cross River region of Nigeria. BMC Evol Biol 10: 92.
Africa	Sub-Sahara	Bight of Biafra	Cameroon	Yaoundé city	9	Silva WA, Bortolini MC, Schneider MP, Marrero A, Elion J, et al. (2006) MtDNA haplogroup analysis of black Brazilian and sub-Saharan populations: implications for the Atlantic slave trade. Hum Biol 78: 29-41.
Africa	Sub-Sahara	Bight of Biafra	Cameroon/Niger	Hide	23	Černý V, Salas A, Hájek M, Žaloudková M, Brdička R (2007) A bidirectional corridor in the Sahel-Sudan belt and the distinctive features of the Chad Basin populations: a history revealed by the mitochondrial DNA genome. Ann Hum Genet 71: 433-452.
Africa	Sub-Sahara	Bight of Biafra	Cameroon/Niger	Kotoco	56	Černý V, Salas A, Hájek M, Žaloudková M, Brdička R (2007) A bidirectional corridor in the Sahel-Sudan belt and the distinctive features of the Chad Basin populations: a history revealed by the mitochondrial DNA genome. Ann Hum Genet 71: 433-452.
Africa	Sub-Sahara	Bight of Biafra	Cameroon/Niger	Mafa	32	Černý V, Salas A, Hájek M, Žaloudková M, Brdička R (2007) A bidirectional corridor in the Sahel-Sudan belt and the distinctive features of the Chad Basin populations: a history revealed by the mitochondrial DNA genome. Ann Hum Genet 71: 433-452.
Africa	Sub-Sahara	Bight of Biafra	Cameroon/Niger	Masa	32	Černý V, Salas A, Hájek M, Žaloudková M, Brdička R (2007) A bidirectional corridor in the Sahel-Sudan belt and the distinctive features of the Chad Basin populations: a history revealed by the mitochondrial DNA genome. Ann Hum Genet 71: 433-452.
Africa	Sub-Sahara	Bight of Biafra	Central African Replublic (C.A.R.)	Biaka	56	Quintana-Murci L, Quach H, Harmant C, Luca F, Massonnet B, et al. (2008) Maternal traces of deep common ancestry and asymmetric gene flow between Pygmy hunter-gatherers and Bantu-speaking farmers. Proc Natl Acad Sci U S A 105: 1596-1601.
Africa	Sub-Sahara	Bight of Biafra	Central African Replublic (C.A.R.)	Biaka	17	Vigilant L, Pennington R, Harpending H, Kocher TD, Wilson AC (1989) Mitochondria DNA sequences in single hairs from a southern African population. Proc Natl Acad Sci U S A 86: 9350-9354.
Africa	Sub-Sahara	Bight of Biafra	Central African Replublic (C.A.R.)	Mbenzele-Pygmy	57	Destro-Bisol G, Coia V, Boschi I, Verginelli F, Caglia A, et al. (2004) The analysis of variation of mtDNA hypervariable region 1 suggests that Eastern and Western Pygmies diverged before the Bantu expansion. Am Nat 163: 212-226.
Africa	Sub-Sahara	Bight of Biafra	Central African Replublic (C.A.R.)	Sanga	30	Batini C, Coia V, Battaggia C, Rocha J, Pilkington MM, et al. (2007) Phylogeography of the human mitochondrial L1c haplogroup: genetic signatures of the prehistory of Central Africa. Mol Phylogenet Evol 43: 635-644.
Africa	Sub-Sahara	Bight of Biafra	Chad	Arabs Chad; Kanem and Bagirmi	27	Černý V, Salas A, Hájek M, Žaloudková M, Brdička R (2007) A bidirectional corridor in the Sahel-Sudan belt and the distinctive features of the Chad Basin populations: a history revealed by the mitochondrial DNA genome. Ann Hum Genet 71: 433-452.
Africa	Sub-Sahara	Bight of Biafra	Chad	Buduma	30	Černý V, Salas A, Hájek M, Žaloudková M, Brdička R (2007) A bidirectional corridor in the Sahel-Sudan belt and the distinctive features of the Chad Basin populations: a history revealed by the mitochondrial DNA genome. Ann Hum Genet 71: 433-452.
Africa	Sub-Sahara	Bight of Biafra	Chad	Fulani Bongor	49	Černý V, Salas A, Hájek M, Žaloudková M, Brdička R (2007) A bidirectional corridor in the Sahel-Sudan belt and the distinctive features of the Chad Basin populations: a history revealed by the mitochondrial DNA genome. Ann Hum Genet 71: 433-452.
Africa	Sub-Sahara	Bight of Biafra	Chad	Kanenbu; Kanem	50	Černý V, Salas A, Hájek M, Žaloudková M, Brdička R (2007) A bidirectional corridor in the Sahel-Sudan belt and the distinctive features of the Chad Basin populations: a history revealed by the mitochondrial DNA genome. Ann Hum Genet 71: 433-452.
Africa	Sub-Sahara	Bight of Biafra	Chad	L. Chad Kanuri	14	Watson E, Forster P, Richards M, Bandelt H-J (1997) Mitochondrial footprints of human expansions in Africa. Am J Hum Genet 61: 691-704.
Africa	Sub-Sahara	Bight of Biafra	Democratic Republic of the Congo (D.R.C; Zaire)	Babinga pygmies	44	Batini C, Coia V, Battaggia C, Rocha J, Pilkington MM, et al. (2007) Phylogeography of the human mitochondrial L1c haplogroup: genetic signatures of the prehistory of Central Africa. Mol Phylogenet Evol 43: 635-644.
Africa	Sub-Sahara	Bight of Biafra	Democratic Republic of the Congo (D.R.C; Zaire)	Bateke	50	Batini C, Coia V, Battaggia C, Rocha J, Pilkington MM, et al. (2007) Phylogeography of the human mitochondrial L1c haplogroup: genetic signatures of the prehistory of Central Africa. Mol Phylogenet Evol 43: 635-644.
Africa	Sub-Sahara	Bight of Biafra	Democratic Republic of the Congo (D.R.C; Zaire)	Mbuti	39	Quintana-Murci L, Quach H, Harmant C, Luca F, Massonnet B, et al. (2008) Maternal traces of deep common ancestry and asymmetric gene flow between Pygmy hunter-gatherers and Bantu-speaking farmers. Proc Natl Acad Sci U S A 105: 1596-1601.
Africa	Sub-Sahara	Bight of Biafra	Democratic Republic of the Congo (D.R.C; Zaire)	Mbuti	20	Vigilant L, Pennington R, Harpending H, Kocher TD, Wilson AC (1989) Mitochondria DNA sequences in single hairs from a southern African population. Proc Natl Acad Sci U S A 86: 9350-9354.
Africa	Sub-Sahara	Bight of Biafra	Democratic Republic of the Congo (D.R.C; Zaire)	–	10	Silva WA, Bortolini MC, Schneider MP, Marrero A, Elion J, et al. (2006) MtDNA haplogroup analysis of black Brazilian and sub-Saharan populations: implications for the Atlantic slave trade. Hum Biol 78: 29-41.
Africa	Sub-Sahara	East Africa	Egypt/Sudan	Nubia; S. Egypt/N. Sudan	80	Krings M, Salem AH, Bauer K, Geisert H, Malek A, et al. (1999) mtDNA analysis of Nile River Valley populations: a genetic corridor or a barrier to migration? Am J Hum Genet 64: 1166-1176.
Africa	Sub-Sahara	Senegambia	Equatorial Guinea	Angolares; São Tomé and Principe	30	Trovoada MJ, Pereira L, Gusmao L, Abade A, Amorim A, et al. (2004) Pattern of mtDNA variation in three populations from Sao Tome e Principe. Ann Hum Genet 68: 40-54.
Africa	Sub-Sahara	Senegambia	Equatorial Guinea	Bubi; Bioko	45	Mateu E, Comas D, Calafell F, Pérez-Lezaun A, Abade A, et al. (1997) A tale of two islands: population history and mitochondrial sequence variation of Bioko and São Tomé, Gulf of Guinea. Ann Hum Genet 61: 507-518.
Africa	Sub-Sahara	Senegambia	Equatorial Guinea	Fang	11	Pinto F, González AM, Hernández M, Larruga JM, Cabrera VM (1996) Genetic relationship between the Canary Islanders and their African and Spanish ancestors inferred from mitochondrial DNA sequences. Ann Hum Genet 60 ( Pt 4): 321-330.
Africa	Sub-Sahara	Senegambia	Equatorial Guinea	Forros, São Tomé and Principe	35	Trovoada MJ, Pereira L, Gusmao L, Abade A, Amorim A, et al. (2004) Pattern of mtDNA variation in three populations from Sao Tome e Principe. Ann Hum Genet 68: 40-54.
Africa	Sub-Sahara	Senegambia	Equatorial Guinea	São Tomé and Principe	50	Mateu E, Comas D, Calafell F, Pérez-Lezaun A, Abade A, et al. (1997) A tale of two islands: population history and mitochondrial sequence variation of Bioko and São Tomé, Gulf of Guinea. Ann Hum Genet 61: 507-518.
Africa	Sub-Sahara	East Africa	Eritrea	–		Kivisild T, Reidla M, Metspalu E, Rosa A, Brehm A, et al. (2004) Ethiopian mitochondrial DNA heritage: tracking gene flow across and around the gate of tears. Am J Hum Genet 75: 752-770.
Africa	Sub-Sahara	East Africa	Ethiopia	Ethiopia	74	Thomas MG, Barnes I, Weale ME, Jones AL, Forster P, et al. (2008) New genetic evidence supports isolation and drift in the Ladin communities of the South Tyrolean Alps but not an ancient origin in the Middle East. Eur J Hum Genet 16: 124-134.
Africa	Sub-Sahara	East Africa	Ethiopia	Jewish	41	Non AL, Al-Meeri A, Raaum RL, Sanchez LF, Mulligan CJ (2011) Mitochondrial DNA reveals distinct evolutionary histories for Jewish populations in Yemen and Ethiopia. Am J Phys Anthropol 144: 1-10.
Africa	Sub-Sahara	East Africa	Ethiopia	Tigray		Kivisild T, Reidla M, Metspalu E, Rosa A, Brehm A, et al. (2004) Ethiopian mitochondrial DNA heritage: tracking gene flow across and around the gate of tears. Am J Hum Genet 75: 752-770.
Africa	Sub-Sahara	East Africa	Ethiopia	–	189	Kivisild T, Reidla M, Metspalu E, Rosa A, Brehm A, et al. (2004) Ethiopian mitochondrial DNA heritage: tracking gene flow across and around the gate of tears. Am J Hum Genet 75: 752-770.
Africa	Sub-Sahara	East Africa	Ethiopia	–	27	Kivisild T, Reidla M, Metspalu E, Rosa A, Brehm A, et al. (2004) Ethiopian mitochondrial DNA heritage: tracking gene flow across and around the gate of tears. Am J Hum Genet 75: 752-770.
Africa	Sub-Sahara	East Africa	Ethiopia	–	190	Kivisild T, Reidla M, Metspalu E, Rosa A, Brehm A, et al. (2004) Ethiopian mitochondrial DNA heritage: tracking gene flow across and around the gate of tears. Am J Hum Genet 75: 752-770.
Africa	Sub-Sahara	East Africa	Ethiopia	–	25	Quintana-Murci L, Semino O, Bandelt H-J, Passarino G, McElreavey K, et al. (1999) Genetic evidence of an early exit of Homo sapiens sapiens from Africa through eastern Africa. Nat Genet 23: 437-441.
Africa	Sub-Sahara	East Africa	Ethiopia/Kenya	–	25	Quintana-Murci L, Semino O, Bandelt H-J, Passarino G, McElreavey K, et al. (1999) Genetic evidence of an early exit of Homo sapiens sapiens from Africa through eastern Africa. Nat Genet 23: 437-441.
Africa	Sub-Sahara	Bight of Biafra	Gabon	Akele	48	Quintana-Murci L, Quach H, Harmant C, Luca F, Massonnet B, et al. (2008) Maternal traces of deep common ancestry and asymmetric gene flow between Pygmy hunter-gatherers and Bantu-speaking farmers. Proc Natl Acad Sci U S A 105: 1596-1601.
Africa	Sub-Sahara	Bight of Biafra	Gabon	Ateke	54	Quintana-Murci L, Quach H, Harmant C, Luca F, Massonnet B, et al. (2008) Maternal traces of deep common ancestry and asymmetric gene flow between Pygmy hunter-gatherers and Bantu-speaking farmers. Proc Natl Acad Sci U S A 105: 1596-1601.
Africa	Sub-Sahara	Bight of Biafra	Gabon	Babongo	45	Quintana-Murci L, Quach H, Harmant C, Luca F, Massonnet B, et al. (2008) Maternal traces of deep common ancestry and asymmetric gene flow between Pygmy hunter-gatherers and Bantu-speaking farmers. Proc Natl Acad Sci U S A 105: 1596-1601.
Africa	Sub-Sahara	Bight of Biafra	Gabon	Baka; Northeast	17	Quintana-Murci L, Quach H, Harmant C, Luca F, Massonnet B, et al. (2008) Maternal traces of deep common ancestry and asymmetric gene flow between Pygmy hunter-gatherers and Bantu-speaking farmers. Proc Natl Acad Sci U S A 105: 1596-1601.
Africa	Sub-Sahara	Bight of Biafra	Gabon	Baka; Pygmies; Northeast	22	Quintana-Murci L, Quach H, Harmant C, Luca F, Massonnet B, et al. (2008) Maternal traces of deep common ancestry and asymmetric gene flow between Pygmy hunter-gatherers and Bantu-speaking farmers. Proc Natl Acad Sci U S A 105: 1596-1601.
Africa	Sub-Sahara	Bight of Biafra	Gabon	Bakoya	31	Quintana-Murci L, Quach H, Harmant C, Luca F, Massonnet B, et al. (2008) Maternal traces of deep common ancestry and asymmetric gene flow between Pygmy hunter-gatherers and Bantu-speaking farmers. Proc Natl Acad Sci U S A 105: 1596-1601.
Africa	Sub-Sahara	Bight of Biafra	Gabon	Bakoya; Northeast	31	Quintana-Murci L, Quach H, Harmant C, Luca F, Massonnet B, et al. (2008) Maternal traces of deep common ancestry and asymmetric gene flow between Pygmy hunter-gatherers and Bantu-speaking farmers. Proc Natl Acad Sci U S A 105: 1596-1601.
Africa	Sub-Sahara	Bight of Biafra	Gabon	Benga	50	Quintana-Murci L, Quach H, Harmant C, Luca F, Massonnet B, et al. (2008) Maternal traces of deep common ancestry and asymmetric gene flow between Pygmy hunter-gatherers and Bantu-speaking farmers. Proc Natl Acad Sci U S A 105: 1596-1601.
Africa	Sub-Sahara	Bight of Biafra	Gabon	Duma	47	Quintana-Murci L, Quach H, Harmant C, Luca F, Massonnet B, et al. (2008) Maternal traces of deep common ancestry and asymmetric gene flow between Pygmy hunter-gatherers and Bantu-speaking farmers. Proc Natl Acad Sci U S A 105: 1596-1601.
Africa	Sub-Sahara	Bight of Biafra	Gabon	Eshira	40	Quintana-Murci L, Quach H, Harmant C, Luca F, Massonnet B, et al. (2008) Maternal traces of deep common ancestry and asymmetric gene flow between Pygmy hunter-gatherers and Bantu-speaking farmers. Proc Natl Acad Sci U S A 105: 1596-1601.
Africa	Sub-Sahara	Bight of Biafra	Gabon	Eviya	38	Quintana-Murci L, Quach H, Harmant C, Luca F, Massonnet B, et al. (2008) Maternal traces of deep common ancestry and asymmetric gene flow between Pygmy hunter-gatherers and Bantu-speaking farmers. Proc Natl Acad Sci U S A 105: 1596-1601.
Africa	Sub-Sahara	Bight of Biafra	Gabon	Fang; South	3	Quintana-Murci L, Quach H, Harmant C, Luca F, Massonnet B, et al. (2008) Maternal traces of deep common ancestry and asymmetric gene flow between Pygmy hunter-gatherers and Bantu-speaking farmers. Proc Natl Acad Sci U S A 105: 1596-1601.
Africa	Sub-Sahara	Bight of Biafra	Gabon	Fang-GB	63	Quintana-Murci L, Quach H, Harmant C, Luca F, Massonnet B, et al. (2008) Maternal traces of deep common ancestry and asymmetric gene flow between Pygmy hunter-gatherers and Bantu-speaking farmers. Proc Natl Acad Sci U S A 105: 1596-1601.
Africa	Sub-Sahara	Bight of Biafra	Gabon	Galoa	51	Quintana-Murci L, Quach H, Harmant C, Luca F, Massonnet B, et al. (2008) Maternal traces of deep common ancestry and asymmetric gene flow between Pygmy hunter-gatherers and Bantu-speaking farmers. Proc Natl Acad Sci U S A 105: 1596-1601.
Africa	Sub-Sahara	Bight of Biafra	Gabon	Kota	56	Quintana-Murci L, Quach H, Harmant C, Luca F, Massonnet B, et al. (2008) Maternal traces of deep common ancestry and asymmetric gene flow between Pygmy hunter-gatherers and Bantu-speaking farmers. Proc Natl Acad Sci U S A 105: 1596-1601.
Africa	Sub-Sahara	Bight of Biafra	Gabon	Makina	45	Quintana-Murci L, Quach H, Harmant C, Luca F, Massonnet B, et al. (2008) Maternal traces of deep common ancestry and asymmetric gene flow between Pygmy hunter-gatherers and Bantu-speaking farmers. Proc Natl Acad Sci U S A 105: 1596-1601.
Africa	Sub-Sahara	Bight of Biafra	Gabon	Mitsogo	64	Quintana-Murci L, Quach H, Harmant C, Luca F, Massonnet B, et al. (2008) Maternal traces of deep common ancestry and asymmetric gene flow between Pygmy hunter-gatherers and Bantu-speaking farmers. Proc Natl Acad Sci U S A 105: 1596-1601.
Africa	Sub-Sahara	Bight of Biafra	Gabon	Ndumu	39	Quintana-Murci L, Quach H, Harmant C, Luca F, Massonnet B, et al. (2008) Maternal traces of deep common ancestry and asymmetric gene flow between Pygmy hunter-gatherers and Bantu-speaking farmers. Proc Natl Acad Sci U S A 105: 1596-1601.
Africa	Sub-Sahara	Bight of Biafra	Gabon	Nzebi	63	Quintana-Murci L, Quach H, Harmant C, Luca F, Massonnet B, et al. (2008) Maternal traces of deep common ancestry and asymmetric gene flow between Pygmy hunter-gatherers and Bantu-speaking farmers. Proc Natl Acad Sci U S A 105: 1596-1601.
Africa	Sub-Sahara	Bight of Biafra	Gabon	Obama	47	Quintana-Murci L, Quach H, Harmant C, Luca F, Massonnet B, et al. (2008) Maternal traces of deep common ancestry and asymmetric gene flow between Pygmy hunter-gatherers and Bantu-speaking farmers. Proc Natl Acad Sci U S A 105: 1596-1601.
Africa	Sub-Sahara	Bight of Biafra	Gabon	Orungu	20	Quintana-Murci L, Quach H, Harmant C, Luca F, Massonnet B, et al. (2008) Maternal traces of deep common ancestry and asymmetric gene flow between Pygmy hunter-gatherers and Bantu-speaking farmers. Proc Natl Acad Sci U S A 105: 1596-1601.
Africa	Sub-Sahara	Bight of Biafra	Gabon	Punu	52	Quintana-Murci L, Quach H, Harmant C, Luca F, Massonnet B, et al. (2008) Maternal traces of deep common ancestry and asymmetric gene flow between Pygmy hunter-gatherers and Bantu-speaking farmers. Proc Natl Acad Sci U S A 105: 1596-1601.
Africa	Sub-Sahara	Bight of Biafra	Gabon	Punu	52	Quintana-Murci L, Quach H, Harmant C, Luca F, Massonnet B, et al. (2008) Maternal traces of deep common ancestry and asymmetric gene flow between Pygmy hunter-gatherers and Bantu-speaking farmers. Proc Natl Acad Sci U S A 105: 1596-1601.
Africa	Sub-Sahara	Bight of Biafra	Gabon	Shake	51	Quintana-Murci L, Quach H, Harmant C, Luca F, Massonnet B, et al. (2008) Maternal traces of deep common ancestry and asymmetric gene flow between Pygmy hunter-gatherers and Bantu-speaking farmers. Proc Natl Acad Sci U S A 105: 1596-1601.
Africa	Sub-Sahara	Gold Coast	Ghana	Enchi	20	Veeramah KR, Connell BA, Pour NA, Powell A, Plaster CA, et al. (2010) Little genetic differentiation as assessed by uniparental markers in the presence of substantial language variation in peoples of the Cross River region of Nigeria. BMC Evol Biol 10: 92.
Africa	Sub-Sahara	Gold Coast	Ghana	Enchi	59	Veeramah KR, Connell BA, Pour NA, Powell A, Plaster CA, et al. (2010) Little genetic differentiation as assessed by uniparental markers in the presence of substantial language variation in peoples of the Cross River region of Nigeria. BMC Evol Biol 10: 92.
Africa	Sub-Sahara	Gold Coast	Ghana	Ho	87	Veeramah KR, Connell BA, Pour NA, Powell A, Plaster CA, et al. (2010) Little genetic differentiation as assessed by uniparental markers in the presence of substantial language variation in peoples of the Cross River region of Nigeria. BMC Evol Biol 10: 92.
Africa	Sub-Sahara	Gold Coast	Ghana	Kibi	51	Veeramah KR, Connell BA, Pour NA, Powell A, Plaster CA, et al. (2010) Little genetic differentiation as assessed by uniparental markers in the presence of substantial language variation in peoples of the Cross River region of Nigeria. BMC Evol Biol 10: 92.
Africa	Sub-Sahara	Gold Coast	Ghana	Sefwi-Wiawso	21	Veeramah KR, Connell BA, Pour NA, Powell A, Plaster CA, et al. (2010) Little genetic differentiation as assessed by uniparental markers in the presence of substantial language variation in peoples of the Cross River region of Nigeria. BMC Evol Biol 10: 92.
Africa	Sub-Sahara	Senegambia	Guinea-Bissau	Baiote	6	Rosa A, Brehm A, Kivisild T, Metspalu E, Villems R (2004) MtDNA profile of West Africa Guineans: towards a better understanding of the Senegambia region. Ann Hum Genet 68: 340-352.
Africa	Sub-Sahara	Senegambia	Guinea-Bissau	Balanta	62	Rosa A, Brehm A, Kivisild T, Metspalu E, Villems R (2004) MtDNA profile of West Africa Guineans: towards a better understanding of the Senegambia region. Ann Hum Genet 68: 340-352.
Africa	Sub-Sahara	Senegambia	Guinea-Bissau	Banhu	1	Rosa A, Brehm A, Kivisild T, Metspalu E, Villems R (2004) MtDNA profile of West Africa Guineans: towards a better understanding of the Senegambia region. Ann Hum Genet 68: 340-352.
Africa	Sub-Sahara	Senegambia	Guinea-Bissau	Beafada	19	Rosa A, Brehm A, Kivisild T, Metspalu E, Villems R (2004) MtDNA profile of West Africa Guineans: towards a better understanding of the Senegambia region. Ann Hum Genet 68: 340-352.
Africa	Sub-Sahara	Senegambia	Guinea-Bissau	Bijago'	22	Rosa A, Brehm A, Kivisild T, Metspalu E, Villems R (2004) MtDNA profile of West Africa Guineans: towards a better understanding of the Senegambia region. Ann Hum Genet 68: 340-352.
Africa	Sub-Sahara	Senegambia	Guinea-Bissau	Brame	8	Rosa A, Brehm A, Kivisild T, Metspalu E, Villems R (2004) MtDNA profile of West Africa Guineans: towards a better understanding of the Senegambia region. Ann Hum Genet 68: 340-352.
Africa	Sub-Sahara	Senegambia	Guinea-Bissau	Cassanga	6	Rosa A, Brehm A, Kivisild T, Metspalu E, Villems R (2004) MtDNA profile of West Africa Guineans: towards a better understanding of the Senegambia region. Ann Hum Genet 68: 340-352.
Africa	Sub-Sahara	Senegambia	Guinea-Bissau	Diola	18	Rosa A, Brehm A, Kivisild T, Metspalu E, Villems R (2004) MtDNA profile of West Africa Guineans: towards a better understanding of the Senegambia region. Ann Hum Genet 68: 340-352.
Africa	Sub-Sahara	Senegambia	Guinea-Bissau	Fulbe	77	Rosa A, Brehm A, Kivisild T, Metspalu E, Villems R (2004) MtDNA profile of West Africa Guineans: towards a better understanding of the Senegambia region. Ann Hum Genet 68: 340-352.
Africa	Sub-Sahara	Senegambia	Guinea-Bissau	Guinea-Bissau	79	Carvalho M, Brito P, Bento AM, Gomes V, Antunes H, et al. (2010) Paternal and maternal lineages in Guinea-Bissau population. Forensic Sci Int Genet.
Africa	Sub-Sahara	Senegambia	Guinea-Bissau	Jancanca	1	Rosa A, Brehm A, Kivisild T, Metspalu E, Villems R (2004) MtDNA profile of West Africa Guineans: towards a better understanding of the Senegambia region. Ann Hum Genet 68: 340-352.
Africa	Sub-Sahara	Senegambia	Guinea-Bissau	Landoma	1	Rosa A, Brehm A, Kivisild T, Metspalu E, Villems R (2004) MtDNA profile of West Africa Guineans: towards a better understanding of the Senegambia region. Ann Hum Genet 68: 340-352.
Africa	Sub-Sahara	Senegambia	Guinea-Bissau	Mandinga	30	Rosa A, Brehm A, Kivisild T, Metspalu E, Villems R (2004) MtDNA profile of West Africa Guineans: towards a better understanding of the Senegambia region. Ann Hum Genet 68: 340-352.
Africa	Sub-Sahara	Senegambia	Guinea-Bissau	Manjaco	27	Rosa A, Brehm A, Kivisild T, Metspalu E, Villems R (2004) MtDNA profile of West Africa Guineans: towards a better understanding of the Senegambia region. Ann Hum Genet 68: 340-352.
Africa	Sub-Sahara	Senegambia	Guinea-Bissau	Mankanya	19	Rosa A, Brehm A, Kivisild T, Metspalu E, Villems R (2004) MtDNA profile of West Africa Guineans: towards a better understanding of the Senegambia region. Ann Hum Genet 68: 340-352.
Africa	Sub-Sahara	Senegambia	Guinea-Bissau	Mansonca	18	Rosa A, Brehm A, Kivisild T, Metspalu E, Villems R (2004) MtDNA profile of West Africa Guineans: towards a better understanding of the Senegambia region. Ann Hum Genet 68: 340-352.
Africa	Sub-Sahara	Senegambia	Guinea-Bissau	Nalu	26	Rosa A, Brehm A, Kivisild T, Metspalu E, Villems R (2004) MtDNA profile of West Africa Guineans: towards a better understanding of the Senegambia region. Ann Hum Genet 68: 340-352.
Africa	Sub-Sahara	Senegambia	Guinea-Bissau	Papel	23	Rosa A, Brehm A, Kivisild T, Metspalu E, Villems R (2004) MtDNA profile of West Africa Guineans: towards a better understanding of the Senegambia region. Ann Hum Genet 68: 340-352.
Africa	Sub-Sahara	Senegambia	Guinea-Bissau	Sussu	8	Rosa A, Brehm A, Kivisild T, Metspalu E, Villems R (2004) MtDNA profile of West Africa Guineans: towards a better understanding of the Senegambia region. Ann Hum Genet 68: 340-352.
Africa	Sub-Sahara	Gold Coast	Ivory Coast	Ahizi	128	Brucato N, Cassar O, Tonasso L, Tortevoye P, Migot-Nabias F, et al. (2010) The imprint of the Slave Trade in an African American population: mitochondrial DNA, Y chromosome and HTLV-1 analysis in the Noir Marron of French Guiana. BMC Evol Biol 10: 314.
Africa	Sub-Sahara	Gold Coast	Ivory Coast	Yacouba	62	Brucato N, Cassar O, Tonasso L, Tortevoye P, Migot-Nabias F, et al. (2010) The imprint of the Slave Trade in an African American population: mitochondrial DNA, Y chromosome and HTLV-1 analysis in the Noir Marron of French Guiana. BMC Evol Biol 10: 314.
Africa	Sub-Sahara	East Africa	Kenya	Kikuyu	24	Watson E, Forster P, Richards M, Bandelt H-J (1997) Mitochondrial footprints of human expansions in Africa. Am J Hum Genet 61: 691-704.
Africa	Sub-Sahara	East Africa	Kenya	Nairobi	100	Brandstätter A, Peterson CT, Irwin JA, Mpoke S, Koech DK, et al. (2004) Mitochondrial DNA control region sequences from Nairobi (Kenya): inferring phylogenetic parameters for the establishment of a forensic database. Int J Legal Med 118: 294-306.
Africa	Sub-Sahara	East Africa	Kenya	Turkana	37	Watson E, Forster P, Richards M, Bandelt H-J (1997) Mitochondrial footprints of human expansions in Africa. Am J Hum Genet 61: 691-704.
Africa	Sub-Sahara	Southeast Africa	La Reunion	Reunionese	41	Berniell-Lee G, Plaza S, Bosch E, Calafell F, Jourdan E, et al. (2008) Admixture and sexual bias in the population settlement of La Reunion Island (Indian Ocean). Am J Phys Anthropol 136: 100-107.
Africa	Sub-Sahara	Southeast Africa	Madagascar	Antaisaka	11	Tofanelli S, Bertoncini S, Castri L, Luiselli D, Calafell F, et al. (2009) On the origins and admixture of Malagasy: new evidence from high-resolution analyses of paternal and maternal lineages. Mol Biol Evol 26: 2109-2124.
Africa	Sub-Sahara	Southeast Africa	Madagascar	Antandroy	59	Tofanelli S, Bertoncini S, Castri L, Luiselli D, Calafell F, et al. (2009) On the origins and admixture of Malagasy: new evidence from high-resolution analyses of paternal and maternal lineages. Mol Biol Evol 26: 2109-2124.
Africa	Sub-Sahara	Southeast Africa	Madagascar	Antanosy	54	Tofanelli S, Bertoncini S, Castri L, Luiselli D, Calafell F, et al. (2009) On the origins and admixture of Malagasy: new evidence from high-resolution analyses of paternal and maternal lineages. Mol Biol Evol 26: 2109-2124.
Africa	Sub-Sahara	Southeast Africa	Madagascar	Merina	9	Tofanelli S, Bertoncini S, Castri L, Luiselli D, Calafell F, et al. (2009) On the origins and admixture of Malagasy: new evidence from high-resolution analyses of paternal and maternal lineages. Mol Biol Evol 26: 2109-2124.
Africa	Sub-Sahara	Senegambia	Mali	Bambara	19	Ely B, Wilson JL, Jackson F, Jackson BA (2006) African-American mitochondrial DNAs often match mtDNAs found in multiple African ethnic groups. BMC Biol 4: 34.
Africa	Sub-Sahara	Senegambia	Mali	Bambara	52	González AM, Brehm A, Pérez JA, Maca-Meyer N, Flores C, et al. (2003) Mitochondrial DNA affinities at the Atlantic fringe of Europe. Am J Phys Anthropol 120: 391-404.
Africa	Sub-Sahara	Senegambia	Mali	Bobo	5	González AM, Brehm A, Pérez JA, Maca-Meyer N, Flores C, et al. (2003) Mitochondrial DNA affinities at the Atlantic fringe of Europe. Am J Phys Anthropol 120: 391-404.
Africa	Sub-Sahara	Senegambia	Mali	Dogon	6	González AM, Brehm A, Pérez JA, Maca-Meyer N, Flores C, et al. (2003) Mitochondrial DNA affinities at the Atlantic fringe of Europe. Am J Phys Anthropol 120: 391-404.
Africa	Sub-Sahara	Senegambia	Mali	Malinke	61	Ely B, Wilson JL, Jackson F, Jackson BA (2006) African-American mitochondrial DNAs often match mtDNAs found in multiple African ethnic groups. BMC Biol 4: 34.
Africa	Sub-Sahara	Senegambia	Mali	Malinke	124	González AM, Brehm A, Pérez JA, Maca-Meyer N, Flores C, et al. (2003) Mitochondrial DNA affinities at the Atlantic fringe of Europe. Am J Phys Anthropol 120: 391-404.
Africa	Sub-Sahara	Senegambia	Mali	Peul	15	González AM, Brehm A, Pérez JA, Maca-Meyer N, Flores C, et al. (2003) Mitochondrial DNA affinities at the Atlantic fringe of Europe. Am J Phys Anthropol 120: 391-404.
Africa	Sub-Sahara	Senegambia	Mali	Senoufo	1	González AM, Brehm A, Pérez JA, Maca-Meyer N, Flores C, et al. (2003) Mitochondrial DNA affinities at the Atlantic fringe of Europe. Am J Phys Anthropol 120: 391-404.
Africa	Sub-Sahara	Senegambia	Mali	Soninke	3	González AM, Brehm A, Pérez JA, Maca-Meyer N, Flores C, et al. (2003) Mitochondrial DNA affinities at the Atlantic fringe of Europe. Am J Phys Anthropol 120: 391-404.
Africa	Sub-Sahara	Senegambia	Mali	Sonrhai	6	González AM, Brehm A, Pérez JA, Maca-Meyer N, Flores C, et al. (2003) Mitochondrial DNA affinities at the Atlantic fringe of Europe. Am J Phys Anthropol 120: 391-404.
Africa	Sub-Sahara	Senegambia	Mali	Tuareg	1	González AM, Brehm A, Pérez JA, Maca-Meyer N, Flores C, et al. (2003) Mitochondrial DNA affinities at the Atlantic fringe of Europe. Am J Phys Anthropol 120: 391-404.
Africa	Sub-Sahara	Senegambia	Mali	Tuareg; Gossi	21	Pereira L, Černý V, Cerezo M, Silva NM, Hájek M, et al. (2010) Linking the sub-Saharan and West Eurasian gene pools: maternal and paternal heritage of the Tuareg nomads from the African Sahel. Eur J Hum Genet 18: 915-923.
Africa	Sub-Sahara	Senegambia	Mali	–	4	González AM, Brehm A, Pérez JA, Maca-Meyer N, Flores C, et al. (2003) Mitochondrial DNA affinities at the Atlantic fringe of Europe. Am J Phys Anthropol 120: 391-404.
Africa	Sub-Sahara	Southeast Africa	Mozambique	Chopi	27	Salas A, Richards M, De la Fé T, Lareu MV, Sobrino B, et al. (2002) The making of the African mtDNA landscape. Am J Hum Genet 71: 1082-1111.
Africa	Sub-Sahara	Southeast Africa	Mozambique	Chwabo	20	Salas A, Richards M, De la Fé T, Lareu MV, Sobrino B, et al. (2002) The making of the African mtDNA landscape. Am J Hum Genet 71: 1082-1111.
Africa	Sub-Sahara	Southeast Africa	Mozambique	Lomwe	20	Salas A, Richards M, De la Fé T, Lareu MV, Sobrino B, et al. (2002) The making of the African mtDNA landscape. Am J Hum Genet 71: 1082-1111.
Africa	Sub-Sahara	Southeast Africa	Mozambique	Lomwe	20	Salas A, Richards M, De la Fé T, Lareu MV, Sobrino B, et al. (2002) The making of the African mtDNA landscape. Am J Hum Genet 71: 1082-1111.
Africa	Sub-Sahara	Southeast Africa	Mozambique	Makhuwa	20	Salas A, Richards M, De la Fé T, Lareu MV, Sobrino B, et al. (2002) The making of the African mtDNA landscape. Am J Hum Genet 71: 1082-1111.
Africa	Sub-Sahara	Southeast Africa	Mozambique	Makonde	19	Salas A, Richards M, De la Fé T, Lareu MV, Sobrino B, et al. (2002) The making of the African mtDNA landscape. Am J Hum Genet 71: 1082-1111.
Africa	Sub-Sahara	Southeast Africa	Mozambique	Ndau	19	Salas A, Richards M, De la Fé T, Lareu MV, Sobrino B, et al. (2002) The making of the African mtDNA landscape. Am J Hum Genet 71: 1082-1111.
Africa	Sub-Sahara	Southeast Africa	Mozambique	Nguni	11	Salas A, Richards M, De la Fé T, Lareu MV, Sobrino B, et al. (2002) The making of the African mtDNA landscape. Am J Hum Genet 71: 1082-1111.
Africa	Sub-Sahara	Southeast Africa	Mozambique	Nyanja	20	Salas A, Richards M, De la Fé T, Lareu MV, Sobrino B, et al. (2002) The making of the African mtDNA landscape. Am J Hum Genet 71: 1082-1111.
Africa	Sub-Sahara	Southeast Africa	Mozambique	Nyungwe	19	Salas A, Richards M, De la Fé T, Lareu MV, Sobrino B, et al. (2002) The making of the African mtDNA landscape. Am J Hum Genet 71: 1082-1111.
Africa	Sub-Sahara	Southeast Africa	Mozambique	Ronga	21	Salas A, Richards M, De la Fé T, Lareu MV, Sobrino B, et al. (2002) The making of the African mtDNA landscape. Am J Hum Genet 71: 1082-1111.
Africa	Sub-Sahara	Southeast Africa	Mozambique	Sena	21	Salas A, Richards M, De la Fé T, Lareu MV, Sobrino B, et al. (2002) The making of the African mtDNA landscape. Am J Hum Genet 71: 1082-1111.
Africa	Sub-Sahara	Southeast Africa	Mozambique	Shangaan	22	Salas A, Richards M, De la Fé T, Lareu MV, Sobrino B, et al. (2002) The making of the African mtDNA landscape. Am J Hum Genet 71: 1082-1111.
Africa	Sub-Sahara	Southeast Africa	Mozambique	Shona	18	Salas A, Richards M, De la Fé T, Lareu MV, Sobrino B, et al. (2002) The making of the African mtDNA landscape. Am J Hum Genet 71: 1082-1111.
Africa	Sub-Sahara	Southeast Africa	Mozambique	Tonga	20	Salas A, Richards M, De la Fé T, Lareu MV, Sobrino B, et al. (2002) The making of the African mtDNA landscape. Am J Hum Genet 71: 1082-1111.
Africa	Sub-Sahara	Southeast Africa	Mozambique	Tswa	19	Salas A, Richards M, De la Fé T, Lareu MV, Sobrino B, et al. (2002) The making of the African mtDNA landscape. Am J Hum Genet 71: 1082-1111.
Africa	Sub-Sahara	Southeast Africa	Mozambique	Yao	10	Salas A, Richards M, De la Fé T, Lareu MV, Sobrino B, et al. (2002) The making of the African mtDNA landscape. Am J Hum Genet 71: 1082-1111.
Africa	Sub-Sahara	Southeast Africa	Mozambique	–	109	Pereira L, Macaulay V, Torroni A, Scozzari R, Prata M-J, et al. (2001) Prehistoric and historic traces in the mtDNA of Mozambique: insights into the Bantu expansions and the slave trade. Ann Hum Genet 65: 439-458.
Africa	Sub-Sahara	Southeast Africa	Mozambique	–	1	Salas A, Richards M, De la Fé T, Lareu MV, Sobrino B, et al. (2002) The making of the African mtDNA landscape. Am J Hum Genet 71: 1082-1111.
Africa	Sub-Sahara	South Africa	Namibia	Khwe	31	Chen Y-S, Olckers A, Schurr TG, Kogelnik AM, Huoponen K, et al. (2000) mtDNA variation in the South African Kung and Khwe-and their genetic relationships to other African populations. Am J Hum Genet 66: 1362-1383.
Africa	Sub-Sahara	South Africa	Namibia	–	25	Vigilant L, Pennington R, Harpending H, Kocher TD, Wilson AC (1989) Mitochondria DNA sequences in single hairs from a southern African population. Proc Natl Acad Sci U S A 86: 9350-9354.
Africa	Sub-Sahara	South Africa	Namibia	Dama	21	Soodyall H (1993) Mitochondrial DNA polymorphisms in Southern African populations [ PhD thesis]: University of the Witwatersrand, Johannesburg.
Africa	Sub-Sahara	South Africa	Namibia	Herero	12	Soodyall H (1993) Mitochondrial DNA polymorphisms in Southern African populations [ PhD thesis]: University of the Witwatersrand, Johannesburg.
Africa	Sub-Sahara	South Africa	Namibia	Herero	27	Vigilant L, Pennington R, Harpending H, Kocher TD, Wilson AC (1989) Mitochondria DNA sequences in single hairs from a southern African population. Proc Natl Acad Sci U S A 86: 9350-9354.
Africa	Sub-Sahara	South Africa	Namibia	Nama	18	Soodyall H (1993) Mitochondrial DNA polymorphisms in Southern African populations [ PhD thesis]: University of the Witwatersrand, Johannesburg.
Africa	Sub-Sahara	Bight of Biafra	Niger	Songhai	10	Watson E, Forster P, Richards M, Bandelt H-J (1997) Mitochondrial footprints of human expansions in Africa. Am J Hum Genet 61: 691-704.
Africa	Sub-Sahara	Bight of Biafra	Nigeria	Arabs Shuwa; Borno state	38	Černý V, Salas A, Hájek M, Žaloudková M, Brdička R (2007) A bidirectional corridor in the Sahel-Sudan belt and the distinctive features of the Chad Basin populations: a history revealed by the mitochondrial DNA genome. Ann Hum Genet 71: 433-452.
Africa	Sub-Sahara	Bight of Biafra	Nigeria	Bakola pygmies	30	Tishkoff SA, Gonder MK, Henn BM, Mortensen H, Knight A, et al. (2007) History of click-speaking populations of Africa inferred from mtDNA and Y chromosome genetic variation. Mol Biol Evol 24: 2180-2195.
Africa	Sub-Sahara	Bight of Biafra	Nigeria	Kanuri; Borno	31	Černý V, Salas A, Hájek M, Žaloudková M, Brdička R (2007) A bidirectional corridor in the Sahel-Sudan belt and the distinctive features of the Chad Basin populations: a history revealed by the mitochondrial DNA genome. Ann Hum Genet 71: 433-452.
Africa	Sub-Sahara	Bight of Biafra	Nigeria	Hausa	20	Watson E, Forster P, Richards M, Bandelt H-J (1997) Mitochondrial footprints of human expansions in Africa. Am J Hum Genet 61: 691-704.
Africa	Sub-Sahara	Bight of Biafra	Nigeria	Fulbe	60	Watson E, Forster P, Richards M, Bandelt H-J (1997) Mitochondrial footprints of human expansions in Africa. Am J Hum Genet 61: 691-704.
Africa	Sub-Sahara	Bight of Biafra	Nigeria	Yoruba	14	Vigilant L, Pennington R, Harpending H, Kocher TD, Wilson AC (1989) Mitochondria DNA sequences in single hairs from a southern African population. Proc Natl Acad Sci U S A 86: 9350-9354.
Africa	Sub-Sahara	Bight of Biafra	Nigeria	Yoruba	21	Watson E, Forster P, Richards M, Bandelt H-J (1997) Mitochondrial footprints of human expansions in Africa. Am J Hum Genet 61: 691-704.
Africa	Sub-Sahara	East Africa	northeastern Rwanda	Hutu	42	Castri L, Tofanelli S, Garagnani P, Bini C, Fosella X, et al. (2009) mtDNA variability in two Bantu-speaking populations (Shona and Hutu) from Eastern Africa: implications for peopling and migration patterns in sub-Saharan Africa. Am J Phys Anthropol 140: 302-311.
Africa	Sub-Sahara	Bight of Biafra	Republic of Niger	Tuareg; Kel Karan; Karnagnan	31	Pereira L, Černý V, Cerezo M, Silva NM, Hájek M, et al. (2010) Linking the sub-Saharan and West Eurasian gene pools: maternal and paternal heritage of the Tuareg nomads from the African Sahel. Eur J Hum Genet 18: 915-923.
Africa	Sub-Sahara	Bight of Biafra	Sao Tomé e Principe	Tongas; Sao Tomé e Principe	38	Trovoada MJ, Pereira L, Gusmao L, Abade A, Amorim A, et al. (2004) Pattern of mtDNA variation in three populations from Sao Tome e Principe. Ann Hum Genet 68: 40-54.
Africa	Sub-Sahara	Senegambia	Senegal	Bambara	3	Stefflova K, Dulik MC, Pai AA, Walker AH, Zeigler-Johnson CM, et al. (2009) Evaluation of group genetic ancestry of populations from Philadelphia and Dakar in the context of sex-biased admixture in the Americas. PLoS One 4: e7842.
Africa	Sub-Sahara	Senegambia	Senegal	Diola	3	Stefflova K, Dulik MC, Pai AA, Walker AH, Zeigler-Johnson CM, et al. (2009) Evaluation of group genetic ancestry of populations from Philadelphia and Dakar in the context of sex-biased admixture in the Americas. PLoS One 4: e7842.
Africa	Sub-Sahara	Senegambia	Senegal	Ivoirienne	1	Stefflova K, Dulik MC, Pai AA, Walker AH, Zeigler-Johnson CM, et al. (2009) Evaluation of group genetic ancestry of populations from Philadelphia and Dakar in the context of sex-biased admixture in the Americas. PLoS One 4: e7842.
Africa	Sub-Sahara	Senegambia	Senegal	Lebou	2	Stefflova K, Dulik MC, Pai AA, Walker AH, Zeigler-Johnson CM, et al. (2009) Evaluation of group genetic ancestry of populations from Philadelphia and Dakar in the context of sex-biased admixture in the Americas. PLoS One 4: e7842.
Africa	Sub-Sahara	Senegambia	Senegal	Mandiak	1	Stefflova K, Dulik MC, Pai AA, Walker AH, Zeigler-Johnson CM, et al. (2009) Evaluation of group genetic ancestry of populations from Philadelphia and Dakar in the context of sex-biased admixture in the Americas. PLoS One 4: e7842.
Africa	Sub-Sahara	Senegambia	Senegal	Mandique	1	Stefflova K, Dulik MC, Pai AA, Walker AH, Zeigler-Johnson CM, et al. (2009) Evaluation of group genetic ancestry of populations from Philadelphia and Dakar in the context of sex-biased admixture in the Americas. PLoS One 4: e7842.
Africa	Sub-Sahara	Senegambia	Senegal	Mankanya	1	Stefflova K, Dulik MC, Pai AA, Walker AH, Zeigler-Johnson CM, et al. (2009) Evaluation of group genetic ancestry of populations from Philadelphia and Dakar in the context of sex-biased admixture in the Americas. PLoS One 4: e7842.
Africa	Sub-Sahara	Senegambia	Senegal	Maure	1	Stefflova K, Dulik MC, Pai AA, Walker AH, Zeigler-Johnson CM, et al. (2009) Evaluation of group genetic ancestry of populations from Philadelphia and Dakar in the context of sex-biased admixture in the Americas. PLoS One 4: e7842.
Africa	Sub-Sahara	Senegambia	Senegal	Peulh	10	Stefflova K, Dulik MC, Pai AA, Walker AH, Zeigler-Johnson CM, et al. (2009) Evaluation of group genetic ancestry of populations from Philadelphia and Dakar in the context of sex-biased admixture in the Americas. PLoS One 4: e7842.
Africa	Sub-Sahara	Senegambia	Senegal	Poular	2	Stefflova K, Dulik MC, Pai AA, Walker AH, Zeigler-Johnson CM, et al. (2009) Evaluation of group genetic ancestry of populations from Philadelphia and Dakar in the context of sex-biased admixture in the Americas. PLoS One 4: e7842.
Africa	Sub-Sahara	Senegambia	Senegal	Sahalle	1	Stefflova K, Dulik MC, Pai AA, Walker AH, Zeigler-Johnson CM, et al. (2009) Evaluation of group genetic ancestry of populations from Philadelphia and Dakar in the context of sex-biased admixture in the Americas. PLoS One 4: e7842.
Africa	Sub-Sahara	Senegambia	Senegal	–	49	Stefflova K, Dulik MC, Pai AA, Walker AH, Zeigler-Johnson CM, et al. (2009) Evaluation of group genetic ancestry of populations from Philadelphia and Dakar in the context of sex-biased admixture in the Americas. PLoS One 4: e7842.
Africa	Sub-Sahara	Senegambia	Senegal	Mandenka	119	Graven L, Passarino G, Semino O, Boursot P, Santachiara-Benerecetti S, et al. (1995) Evolutionary correlation between control region sequence and restriction polymorphisms in the mitochondrial genome of a large Senegalese Mandenka sample. Mol Biol Evol 12: 334-345.
Africa	Sub-Sahara	Senegambia	Senegal	Serer	23	Rando JC, Pinto F, González AM, Hernández M, Larruga JM, et al. (1998) Mitochondrial DNA analysis of northwest African populations reveals genetic exchanges with European, near-eastern, and sub-Saharan populations. Ann Hum Genet 62 ( Pt 6): 531-550.
Africa	Sub-Sahara	Senegambia	Senegal	Serer	7	Stefflova K, Dulik MC, Pai AA, Walker AH, Zeigler-Johnson CM, et al. (2009) Evaluation of group genetic ancestry of populations from Philadelphia and Dakar in the context of sex-biased admixture in the Americas. PLoS One 4: e7842.
Africa	Sub-Sahara	Senegambia	Senegal	Tukulor	4	Stefflova K, Dulik MC, Pai AA, Walker AH, Zeigler-Johnson CM, et al. (2009) Evaluation of group genetic ancestry of populations from Philadelphia and Dakar in the context of sex-biased admixture in the Americas. PLoS One 4: e7842.
Africa	Sub-Sahara	Senegambia	Senegal	Wolof	48	Rando JC, Pinto F, González AM, Hernández M, Larruga JM, et al. (1998) Mitochondrial DNA analysis of northwest African populations reveals genetic exchanges with European, near-eastern, and sub-Saharan populations. Ann Hum Genet 62 ( Pt 6): 531-550.
Africa	Sub-Sahara	Senegambia	Senegal	Wolof	11	Stefflova K, Dulik MC, Pai AA, Walker AH, Zeigler-Johnson CM, et al. (2009) Evaluation of group genetic ancestry of populations from Philadelphia and Dakar in the context of sex-biased admixture in the Americas. PLoS One 4: e7842.
Africa	Sub-Sahara	Senegambia	Senegal	–	50	Rando JC, Pinto F, González AM, Hernández M, Larruga JM, et al. (1998) Mitochondrial DNA analysis of northwest African populations reveals genetic exchanges with European, near-eastern, and sub-Saharan populations. Ann Hum Genet 62 ( Pt 6): 531-550.
Africa	Sub-Sahara	Senegambia	Sierra Leona	Limba	68	Jackson BA, Wilson JL, Kirbah S, Sidney SS, Rosenberger J, et al. (2005) Mitochondrial DNA genetic diversity among four ethnic groups in Sierra Leone. Am J Phys Anthropol 128: 156-163.
Africa	Sub-Sahara	Senegambia	Sierra Leona	Loko	29	Jackson BA, Wilson JL, Kirbah S, Sidney SS, Rosenberger J, et al. (2005) Mitochondrial DNA genetic diversity among four ethnic groups in Sierra Leone. Am J Phys Anthropol 128: 156-163.
Africa	Sub-Sahara	Senegambia	Sierra Leona	Mende	59	Jackson BA, Wilson JL, Kirbah S, Sidney SS, Rosenberger J, et al. (2005) Mitochondrial DNA genetic diversity among four ethnic groups in Sierra Leone. Am J Phys Anthropol 128: 156-163.
Africa	Sub-Sahara	Senegambia	Sierra Leona	Temne	121	Jackson BA, Wilson JL, Kirbah S, Sidney SS, Rosenberger J, et al. (2005) Mitochondrial DNA genetic diversity among four ethnic groups in Sierra Leone. Am J Phys Anthropol 128: 156-163.
Africa	Sub-Sahara	Senegambia	Sierra Leona	–	109	Monson KL, Miller KWP, Wilson MR, DiZinno JA, Budowle B (2002) The mtDNA Population Database: an integrated software and database resource for forensic comparison. Forensic Sci Commun 4: no 2.
Africa	Sub-Sahara	East Africa	Somalia	–	27	Watson E, Forster P, Richards M, Bandelt H-J (1997) Mitochondrial footprints of human expansions in Africa. Am J Hum Genet 61: 691-704.
Africa	Sub-Sahara	South Africa	South Africa	!Kung	43	Chen Y-S, Olckers A, Schurr TG, Kogelnik AM, Huoponen K, et al. (2000) mtDNA variation in the South African Kung and Khwe-and their genetic relationships to other African populations. Am J Hum Genet 66: 1362-1383.
Africa	Sub-Sahara	South Africa	South Africa	!Xun or Vasekela/Khwe	18	Tishkoff SA, Gonder MK, Henn BM, Mortensen H, Knight A, et al. (2007) History of click-speaking populations of Africa inferred from mtDNA and Y chromosome genetic variation. Mol Biol Evol 24: 2180-2195.
Africa	Sub-Sahara	South Africa	South Africa	Sekele !Kung	38	Soodyall H (1993) Mitochondrial DNA polymorphisms in Southern African populations [ PhD thesis]: University of the Witwatersrand, Johannesburg.
Africa	Sub-Sahara	South Africa	South Africa	Sotho	20	Soodyall H (1993) Mitochondrial DNA polymorphisms in Southern African populations [ PhD thesis]: University of the Witwatersrand, Johannesburg.
Africa	Sub-Sahara	South Africa	South Africa	Xhosa	8	Soodyall H (1993) Mitochondrial DNA polymorphisms in Southern African populations [ PhD thesis]: University of the Witwatersrand, Johannesburg.
Africa	Sub-Sahara	South Africa	South Africa	Zulu	8	Soodyall H (1993) Mitochondrial DNA polymorphisms in Southern African populations [ PhD thesis]: University of the Witwatersrand, Johannesburg.
Africa	Sub-Sahara	Bight of Biafra	Southeast Nigeria	Abak, Ikot Obioma, Ikot Ekpene, Ukanafun; Southeast	44	Veeramah KR, Connell BA, Pour NA, Powell A, Plaster CA, et al. (2010) Little genetic differentiation as assessed by uniparental markers in the presence of substantial language variation in peoples of the Cross River region of Nigeria. BMC Evol Biol 10: 92.
Africa	Sub-Sahara	Bight of Biafra	Southeast Nigeria	Afaha Esang, Ikot Ubom; Southeast	26	Veeramah KR, Connell BA, Pour NA, Powell A, Plaster CA, et al. (2010) Little genetic differentiation as assessed by uniparental markers in the presence of substantial language variation in peoples of the Cross River region of Nigeria. BMC Evol Biol 10: 92.
Africa	Sub-Sahara	Bight of Biafra	Southeast Nigeria	Afaha Esang, Ikot Ubom; Southeast	37	Veeramah KR, Connell BA, Pour NA, Powell A, Plaster CA, et al. (2010) Little genetic differentiation as assessed by uniparental markers in the presence of substantial language variation in peoples of the Cross River region of Nigeria. BMC Evol Biol 10: 92.
Africa	Sub-Sahara	Bight of Biafra	Southeast Nigeria	Afaha Nsit, Mbiokporo; Southeast	36	Veeramah KR, Connell BA, Pour NA, Powell A, Plaster CA, et al. (2010) Little genetic differentiation as assessed by uniparental markers in the presence of substantial language variation in peoples of the Cross River region of Nigeria. BMC Evol Biol 10: 92.
Africa	Sub-Sahara	Bight of Biafra	Southeast Nigeria	Calabar; Southeast	96	Veeramah KR, Connell BA, Pour NA, Powell A, Plaster CA, et al. (2010) Little genetic differentiation as assessed by uniparental markers in the presence of substantial language variation in peoples of the Cross River region of Nigeria. BMC Evol Biol 10: 92.
Africa	Sub-Sahara	Bight of Biafra	Southeast Nigeria	Calabar; Southeast	38	Veeramah KR, Connell BA, Pour NA, Powell A, Plaster CA, et al. (2010) Little genetic differentiation as assessed by uniparental markers in the presence of substantial language variation in peoples of the Cross River region of Nigeria. BMC Evol Biol 10: 92.
Africa	Sub-Sahara	Bight of Biafra	Southeast Nigeria	Calabar; Southeast	28	Veeramah KR, Connell BA, Pour NA, Powell A, Plaster CA, et al. (2010) Little genetic differentiation as assessed by uniparental markers in the presence of substantial language variation in peoples of the Cross River region of Nigeria. BMC Evol Biol 10: 92.
Africa	Sub-Sahara	Bight of Biafra	Southeast Nigeria	Calabar; Southeast	17	Veeramah KR, Connell BA, Pour NA, Powell A, Plaster CA, et al. (2010) Little genetic differentiation as assessed by uniparental markers in the presence of substantial language variation in peoples of the Cross River region of Nigeria. BMC Evol Biol 10: 92.
Africa	Sub-Sahara	Bight of Biafra	Southeast Nigeria	Eniong, Atan Ono Yom; Southeast	49	Veeramah KR, Connell BA, Pour NA, Powell A, Plaster CA, et al. (2010) Little genetic differentiation as assessed by uniparental markers in the presence of substantial language variation in peoples of the Cross River region of Nigeria. BMC Evol Biol 10: 92.
Africa	Sub-Sahara	Bight of Biafra	Southeast Nigeria	Enugu; Southeast	54	Veeramah KR, Connell BA, Pour NA, Powell A, Plaster CA, et al. (2010) Little genetic differentiation as assessed by uniparental markers in the presence of substantial language variation in peoples of the Cross River region of Nigeria. BMC Evol Biol 10: 92.
Africa	Sub-Sahara	Bight of Biafra	Southeast Nigeria	Etebe Afaha Eket, Ekpene Ukpa; Southeast	50	Veeramah KR, Connell BA, Pour NA, Powell A, Plaster CA, et al. (2010) Little genetic differentiation as assessed by uniparental markers in the presence of substantial language variation in peoples of the Cross River region of Nigeria. BMC Evol Biol 10: 92.
Africa	Sub-Sahara	Bight of Biafra	Southeast Nigeria	Ette; Southeast	50	Veeramah KR, Connell BA, Pour NA, Powell A, Plaster CA, et al. (2010) Little genetic differentiation as assessed by uniparental markers in the presence of substantial language variation in peoples of the Cross River region of Nigeria. BMC Evol Biol 10: 92.
Africa	Sub-Sahara	Bight of Biafra	Southeast Nigeria	Eyo Nsik, Eyo Ekpe; Southeast	70	Veeramah KR, Connell BA, Pour NA, Powell A, Plaster CA, et al. (2010) Little genetic differentiation as assessed by uniparental markers in the presence of substantial language variation in peoples of the Cross River region of Nigeria. BMC Evol Biol 10: 92.
Africa	Sub-Sahara	Bight of Biafra	Southeast Nigeria	Ikot Akpan, Afaha Ubiom; Southeast	28	Veeramah KR, Connell BA, Pour NA, Powell A, Plaster CA, et al. (2010) Little genetic differentiation as assessed by uniparental markers in the presence of substantial language variation in peoples of the Cross River region of Nigeria. BMC Evol Biol 10: 92.
Africa	Sub-Sahara	Bight of Biafra	Southeast Nigeria	Ikot Essien, Ikot Ntu; Southeast	50	Veeramah KR, Connell BA, Pour NA, Powell A, Plaster CA, et al. (2010) Little genetic differentiation as assessed by uniparental markers in the presence of substantial language variation in peoples of the Cross River region of Nigeria. BMC Evol Biol 10: 92.
Africa	Sub-Sahara	Bight of Biafra	Southeast Nigeria	Ikot Mbonde, Ikot Ekang; Southeast	48	Veeramah KR, Connell BA, Pour NA, Powell A, Plaster CA, et al. (2010) Little genetic differentiation as assessed by uniparental markers in the presence of substantial language variation in peoples of the Cross River region of Nigeria. BMC Evol Biol 10: 92.
Africa	Sub-Sahara	Bight of Biafra	Southeast Nigeria	Ikot Nakanda, Ikot Ene; Southeast	48	Veeramah KR, Connell BA, Pour NA, Powell A, Plaster CA, et al. (2010) Little genetic differentiation as assessed by uniparental markers in the presence of substantial language variation in peoples of the Cross River region of Nigeria. BMC Evol Biol 10: 92.
Africa	Sub-Sahara	Bight of Biafra	Southeast Nigeria	Ikot Oku, Ikot Ntuenoku; Southeast	48	Veeramah KR, Connell BA, Pour NA, Powell A, Plaster CA, et al. (2010) Little genetic differentiation as assessed by uniparental markers in the presence of substantial language variation in peoples of the Cross River region of Nigeria. BMC Evol Biol 10: 92.
Africa	Sub-Sahara	Bight of Biafra	Southeast Nigeria	Mkpok Ndon Eyo; Southeast	50	Veeramah KR, Connell BA, Pour NA, Powell A, Plaster CA, et al. (2010) Little genetic differentiation as assessed by uniparental markers in the presence of substantial language variation in peoples of the Cross River region of Nigeria. BMC Evol Biol 10: 92.
Africa	Sub-Sahara	Bight of Biafra	Southeast Nigeria	Ndiya; Southeast	49	Veeramah KR, Connell BA, Pour NA, Powell A, Plaster CA, et al. (2010) Little genetic differentiation as assessed by uniparental markers in the presence of substantial language variation in peoples of the Cross River region of Nigeria. BMC Evol Biol 10: 92.
Africa	Sub-Sahara	Bight of Biafra	Southeast Nigeria	Nenwe; Southeast	50	Veeramah KR, Connell BA, Pour NA, Powell A, Plaster CA, et al. (2010) Little genetic differentiation as assessed by uniparental markers in the presence of substantial language variation in peoples of the Cross River region of Nigeria. BMC Evol Biol 10: 92.
Africa	Sub-Sahara	Bight of Biafra	Southeast Nigeria	Netim; Southeast	50	Veeramah KR, Connell BA, Pour NA, Powell A, Plaster CA, et al. (2010) Little genetic differentiation as assessed by uniparental markers in the presence of substantial language variation in peoples of the Cross River region of Nigeria. BMC Evol Biol 10: 92.
Africa	Sub-Sahara	Bight of Biafra	Southeast Nigeria	Obong Itam; Southeast	50	Veeramah KR, Connell BA, Pour NA, Powell A, Plaster CA, et al. (2010) Little genetic differentiation as assessed by uniparental markers in the presence of substantial language variation in peoples of the Cross River region of Nigeria. BMC Evol Biol 10: 92.
Africa	Sub-Sahara	Bight of Biafra	Southeast Nigeria	Onoh, Ntan Mbat; Southeast	50	Veeramah KR, Connell BA, Pour NA, Powell A, Plaster CA, et al. (2010) Little genetic differentiation as assessed by uniparental markers in the presence of substantial language variation in peoples of the Cross River region of Nigeria. BMC Evol Biol 10: 92.
Africa	Sub-Sahara	Bight of Biafra	Southeast Nigeria	Oron; Southeast	28	Veeramah KR, Connell BA, Pour NA, Powell A, Plaster CA, et al. (2010) Little genetic differentiation as assessed by uniparental markers in the presence of substantial language variation in peoples of the Cross River region of Nigeria. BMC Evol Biol 10: 92.
Africa	Sub-Sahara	Bight of Biafra	Southeast Nigeria	Oyo Efam, Ikot Abasi Obori; Southeast	48	Veeramah KR, Connell BA, Pour NA, Powell A, Plaster CA, et al. (2010) Little genetic differentiation as assessed by uniparental markers in the presence of substantial language variation in peoples of the Cross River region of Nigeria. BMC Evol Biol 10: 92.
Africa	Sub-Sahara	East Africa	Sudan	Southern	76	Krings M, Salem AH, Bauer K, Geisert H, Malek A, et al. (1999) mtDNA analysis of Nile River Valley populations: a genetic corridor or a barrier to migration? Am J Hum Genet 64: 1166-1176.
Africa	Sub-Sahara	Southeast Africa	Tanzania	Burunge	38	Tishkoff SA, Gonder MK, Henn BM, Mortensen H, Knight A, et al. (2007) History of click-speaking populations of Africa inferred from mtDNA and Y chromosome genetic variation. Mol Biol Evol 24: 2180-2195.
Africa	Sub-Sahara	Southeast Africa	Tanzania	Dakota	18	Knight A, Underhill PA, Mortensen HM, Zhivotovsky LA, Lin AA, et al. (2003) African Y chromosome and mtDNA divergence provides insight into the history of click languages. Curr Biol 13: 464-473.
Africa	Sub-Sahara	Southeast Africa	Tanzania	Datoga	39	Tishkoff SA, Gonder MK, Henn BM, Mortensen H, Knight A, et al. (2007) History of click-speaking populations of Africa inferred from mtDNA and Y chromosome genetic variation. Mol Biol Evol 24: 2180-2195.
Africa	Sub-Sahara	Southeast Africa	Tanzania	Hadza	61	Knight A, Underhill PA, Mortensen HM, Zhivotovsky LA, Lin AA, et al. (2003) African Y chromosome and mtDNA divergence provides insight into the history of click languages. Curr Biol 13: 464-473.
Africa	Sub-Sahara	Southeast Africa	Tanzania	Hadza	79	Tishkoff SA, Gonder MK, Henn BM, Mortensen H, Knight A, et al. (2007) History of click-speaking populations of Africa inferred from mtDNA and Y chromosome genetic variation. Mol Biol Evol 24: 2180-2195.
Africa	Sub-Sahara	Southeast Africa	Tanzania	Hadza	61	Vigilant L, Pennington R, Harpending H, Kocher TD, Wilson AC (1989) Mitochondria DNA sequences in single hairs from a southern African population. Proc Natl Acad Sci U S A 86: 9350-9354.
Africa	Sub-Sahara	Southeast Africa	Tanzania	Sandawe	82	Tishkoff SA, Gonder MK, Henn BM, Mortensen H, Knight A, et al. (2007) History of click-speaking populations of Africa inferred from mtDNA and Y chromosome genetic variation. Mol Biol Evol 24: 2180-2195.
Africa	Sub-Sahara	Southeast Africa	Tanzania	Sukuma	11	Tishkoff SA, Gonder MK, Henn BM, Mortensen H, Knight A, et al. (2007) History of click-speaking populations of Africa inferred from mtDNA and Y chromosome genetic variation. Mol Biol Evol 24: 2180-2195.
Africa	Sub-Sahara	Southeast Africa	Tanzania	Sukuma, Bantu	21	Knight A, Underhill PA, Mortensen HM, Zhivotovsky LA, Lin AA, et al. (2003) African Y chromosome and mtDNA divergence provides insight into the history of click languages. Curr Biol 13: 464-473.
Africa	Sub-Sahara	Southeast Africa	Tanzania	Turu	29	Tishkoff SA, Gonder MK, Henn BM, Mortensen H, Knight A, et al. (2007) History of click-speaking populations of Africa inferred from mtDNA and Y chromosome genetic variation. Mol Biol Evol 24: 2180-2195.
Africa	Sub-Sahara	East Africa	Uganda	–	44	#N/A
Africa	Sub-Sahara	Southeast Africa	Zambia	Lubumbashi city; Shaba province	10	Silva WA, Bortolini MC, Schneider MP, Marrero A, Elion J, et al. (2006) MtDNA haplogroup analysis of black Brazilian and sub-Saharan populations: implications for the Atlantic slave trade. Hum Biol 78: 29-41.
Africa	Sub-Sahara	Southeast Africa	Zimbabwe	Shona	59	Castri L, Tofanelli S, Garagnani P, Bini C, Fosella X, et al. (2009) mtDNA variability in two Bantu-speaking populations (Shona and Hutu) from Eastern Africa: implications for peopling and migration patterns in sub-Saharan Africa. Am J Phys Anthropol 140: 302-311.
Europe	Europe	Europe	Albania	Albania	42	Belledi M, Poloni ES, Casalotti R, Conterio F, Mikerezi I, et al. (2000) Maternal and paternal lineages in Albania and the genetic structure of Indo-European populations. Eur J Hum Genet 8: 480-486.
Europe	Europe	Europe	Albania	Aromuns; Andon Poci	33	Bosch E, Calafell F, Gonzalez-Neira A, Flaiz C, Mateu E, et al. (2006) Paternal and maternal lineages in the Balkans show a homogeneous landscape over linguistic barriers, except for the isolated Aromuns. Ann Hum Genet 70: 459-487.
Europe	Europe	Europe	Albania	Aromuns; Dukasi	29	Bosch E, Calafell F, Gonzalez-Neira A, Flaiz C, Mateu E, et al. (2006) Paternal and maternal lineages in the Balkans show a homogeneous landscape over linguistic barriers, except for the isolated Aromuns. Ann Hum Genet 70: 459-487.
Europe	Europe	Europe	Albania	–	42	Bosch E, Calafell F, Gonzalez-Neira A, Flaiz C, Mateu E, et al. (2006) Paternal and maternal lineages in the Balkans show a homogeneous landscape over linguistic barriers, except for the isolated Aromuns. Ann Hum Genet 70: 459-487.
Europe	Europe	Europe	Andorra	–	1	Álvarez JC, Johnson DE, Lorente JA, Martínez-espin E, Martínez-González LJ, et al. (2007) Characterization of human control region sequences for Spanish individuals in a forensic mtDNA data set. Legal Med 9: 293-304.
Europe	Europe	Europe	Austria	Western	101	Parson W, Parsons TJ, Scheithauer R, Holland MM (1998) Population data for 101 Austrian Caucasian mitochondrial DNA D-loop sequences: application of mtDNA sequence analysis to a forensic case. Int J Legal Med 111: 124-132.
Europe	Europe	Europe	Austria	–	1246	Brandstätter A, Niederstatter H, Pavlic M, Grubwieser P, Parson W (2007) Generating population data for the EMPOP database - an overview of the mtDNA sequencing and data evaluation processes considering 273 Austrian control region sequences as example. Forensic Sci Int 166: 164-175.
Europe	Europe	Europe	Austria	–	16	Handt O, Richards M, Tromsdorf M, Kilger C, Simanainan J, et al. (1994) Molecular genetic analyses of the Tyrolean Ice Man. Science 264: 1775-1778.
Europe	Europe	Europe	Austria	–	101	Monson KL, Miller KWP, Wilson MR, DiZinno JA, Budowle B (2002) The mtDNA Population Database: an integrated software and database resource for forensic comparison. Forensic Sci Commun 4: no 2.
Europe	Europe	Europe	Belarus	Askhenazi Jewish	9	Behar DM, Hammer MF, Garrigan D, Villems R, Bonne-Tamir B, et al. (2004) MtDNA evidence for a genetic bottleneck in the early history of the Ashkenazi Jewish population. Eur J Hum Genet 12: 355-364.
Europe	Europe	Europe	Belarus	–	96	Richards M, Macaulay V, Hickey E, Vega E, Sykes B, et al. (2000) Tracing European founder lineages in the Near Eastern mtDNA pool. Am J Hum Genet 67: 1251-1276.
Europe	Europe	Europe	Belgium	–	50	#N/A
Europe	Europe	Europe	Belgium	–	1	Álvarez JC, Johnson DE, Lorente JA, Martínez-espin E, Martínez-González LJ, et al. (2007) Characterization of human control region sequences for Spanish individuals in a forensic mtDNA data set. Legal Med 9: 293-304.
Europe	Europe	Europe	Bosnia	–	180	#N/A
Europe	Europe	Europe	Bosnia	–	144	Malyarchuk BA, Grzybowski T, Derenko MV, Czarny J, Drobnic K, et al. (2003) Mitochondrial DNA variability in Bosnians and Slovenians. Ann Hum Genet 67: 412-425.
Europe	Europe	Europe	Britain; UK	Cornwall	93	Richards M, Côrte-Real H, Forster P, Macaulay V, Wilkinson-Herbots H, et al. (1996) Paleolithic and neolithic lineages in the European mitochondrial gene pool. Am J Hum Genet 59: 185-203.
Europe	Europe	Europe	Britain; UK	Cornwall	23	Richards M, Macaulay V, Hickey E, Vega E, Sykes B, et al. (2000) Tracing European founder lineages in the Near Eastern mtDNA pool. Am J Hum Genet 67: 1251-1276.
Europe	Europe	Europe	Britain; UK	–	5	Álvarez JC, Johnson DE, Lorente JA, Martínez-espin E, Martínez-González LJ, et al. (2007) Characterization of human control region sequences for Spanish individuals in a forensic mtDNA data set. Legal Med 9: 293-304.
Europe	Europe	Europe	Britain; UK	–	100	Piercy R, Sullivan KM, Benson N, Gill P (1993) The application of mitochondrial DNA typing to the study of white caucasian genetic identification. Int J Legal Med 106: 85-90.
Europe	Europe	Europe	Bulgaria	Feredjelli; Roma Gypsies	18	Gresham D, Morar B, Underhill PA, Passarino G, Lin AA, et al. (2001) Origins and divergence of the Roma (gypsies). Am J Hum Genet 69: 1314-1331.
Europe	Europe	Europe	Bulgaria	Intreni; Roma Gypsies	16	Gresham D, Morar B, Underhill PA, Passarino G, Lin AA, et al. (2001) Origins and divergence of the Roma (gypsies). Am J Hum Genet 69: 1314-1331.
Europe	Europe	Europe	Bulgaria	Kalaidjii North; Roma Gypsies	20	Gresham D, Morar B, Underhill PA, Passarino G, Lin AA, et al. (2001) Origins and divergence of the Roma (gypsies). Am J Hum Genet 69: 1314-1331.
Europe	Europe	Europe	Bulgaria	Kalaidjii South; Roma Gypsies	10	Gresham D, Morar B, Underhill PA, Passarino G, Lin AA, et al. (2001) Origins and divergence of the Roma (gypsies). Am J Hum Genet 69: 1314-1331.
Europe	Europe	Europe	Bulgaria	Kalderash; Roma Gypsies	23	Gresham D, Morar B, Underhill PA, Passarino G, Lin AA, et al. (2001) Origins and divergence of the Roma (gypsies). Am J Hum Genet 69: 1314-1331.
Europe	Europe	Europe	Bulgaria	Koshnichari South Central, Roma Gypsies	3	Gresham D, Morar B, Underhill PA, Passarino G, Lin AA, et al. (2001) Origins and divergence of the Roma (gypsies). Am J Hum Genet 69: 1314-1331.
Europe	Europe	Europe	Bulgaria	Koshnichari Southwest, Roma Gypsies	5	Gresham D, Morar B, Underhill PA, Passarino G, Lin AA, et al. (2001) Origins and divergence of the Roma (gypsies). Am J Hum Genet 69: 1314-1331.
Europe	Europe	Europe	Bulgaria	Lingurari North; Roma Gypsies	18	Gresham D, Morar B, Underhill PA, Passarino G, Lin AA, et al. (2001) Origins and divergence of the Roma (gypsies). Am J Hum Genet 69: 1314-1331.
Europe	Europe	Europe	Bulgaria	Lingurari South; Roma Gypsies	9	Gresham D, Morar B, Underhill PA, Passarino G, Lin AA, et al. (2001) Origins and divergence of the Roma (gypsies). Am J Hum Genet 69: 1314-1331.
Europe	Europe	Europe	Bulgaria	Lom; Roma Gypsies	43	Gresham D, Morar B, Underhill PA, Passarino G, Lin AA, et al. (2001) Origins and divergence of the Roma (gypsies). Am J Hum Genet 69: 1314-1331.
Europe	Europe	Europe	Bulgaria	Monteni; Roma Gypsies	42	Gresham D, Morar B, Underhill PA, Passarino G, Lin AA, et al. (2001) Origins and divergence of the Roma (gypsies). Am J Hum Genet 69: 1314-1331.
Europe	Europe	Europe	Bulgaria	Turgovzi; Roma Gypsies	25	Gresham D, Morar B, Underhill PA, Passarino G, Lin AA, et al. (2001) Origins and divergence of the Roma (gypsies). Am J Hum Genet 69: 1314-1331.
Europe	Europe	Europe	Bulgaria	–	30	Calafell F, Underhill P, Tolun A, Angelicheva D, Kalaydjieva L (1996) From Asia to Europe: mitochondrial DNA sequence variability in Bulgarians and Turks. Ann Hum Genet 60: 35-49.
Europe	Europe	Europe	Bulgaria	–	102	Richards M, Macaulay V, Hickey E, Vega E, Sykes B, et al. (2000) Tracing European founder lineages in the Near Eastern mtDNA pool. Am J Hum Genet 67: 1251-1276.
Europe	Europe	Europe	Caucasus	Abazinians; North	23	Nasidze I, Stoneking M (2001) Mitochondrial DNA variation and language replacements in the Caucasus. P Roy Soc Lond B Bio 268: 1197-1206.
Europe	Europe	Europe	Caucasus	Chechnya; North	23	Nasidze I, Stoneking M (2001) Mitochondrial DNA variation and language replacements in the Caucasus. P Roy Soc Lond B Bio 268: 1197-1206.
Europe	Europe	Europe	Caucasus	Cherkessians; North	44	Nasidze I, Stoneking M (2001) Mitochondrial DNA variation and language replacements in the Caucasus. P Roy Soc Lond B Bio 268: 1197-1206.
Europe	Europe	Europe	Caucasus	Darginians; North	37	Nasidze I, Stoneking M (2001) Mitochondrial DNA variation and language replacements in the Caucasus. P Roy Soc Lond B Bio 268: 1197-1206.
Europe	Europe	Europe	Caucasus	Ingushians; North	35	Nasidze I, Stoneking M (2001) Mitochondrial DNA variation and language replacements in the Caucasus. P Roy Soc Lond B Bio 268: 1197-1206.
Europe	Europe	Europe	Caucasus	Kabardians; North	51	Nasidze I, Stoneking M (2001) Mitochondrial DNA variation and language replacements in the Caucasus. P Roy Soc Lond B Bio 268: 1197-1206.
Europe	Europe	Europe	Caucasus	NW Caucasus	50	Macaulay V, Richards M, Hickey E, Vega E, Cruciani F, et al. (1999) The emerging tree of West Eurasian mtDNAs: a synthesis of control-region sequences and RFLPs. Am J Hum Genet 64: 232-249.
Europe	Europe	Europe	Chechen Republic	–	13	Richards M, Macaulay V, Hickey E, Vega E, Sykes B, et al. (2000) Tracing European founder lineages in the Near Eastern mtDNA pool. Am J Hum Genet 67: 1251-1276.
Europe	Europe	Europe	Crete	East	10	Forster P, Cali F, Rohl A, Metspalu E, D'Anna R, et al. (2002) Continental and subcontinental distributions of mtDNA control region types. Int J Legal Med 116: 99-108.
Europe	Europe	Europe	Crete	–	23	#N/A
Europe	Europe	Europe	Crete	–	19	Richards M, Côrte-Real H, Forster P, Macaulay V, Wilkinson-Herbots H, et al. (1996) Paleolithic and neolithic lineages in the European mitochondrial gene pool. Am J Hum Genet 59: 185-203.
Europe	Europe	Europe	Crete	–	19	Vernesi C, Di Benedetto G, Caramelli D, Secchieri E, Simoni L, et al. (2001) Genetic characterization of the body attributed to the evangelist Luke. Proc Natl Acad Sci U S A 98: 13460-13463.
Europe	Europe	Europe	Croacia	–	64	#N/A
Europe	Europe	Europe	Croatia	ÄivogoÜ?e	24	Babalini C, Martínez-Labarga C, Tolk HV, Kivisild T, Giampaolo R, et al. (2005) The population history of the Croatian linguistic minority of Molise (southern Italy): a maternal view. Eur J Hum Genet 13: 902-912.
Europe	Europe	Europe	Croatia	Krilo Jesenice	35	Babalini C, Martínez-Labarga C, Tolk HV, Kivisild T, Giampaolo R, et al. (2005) The population history of the Croatian linguistic minority of Molise (southern Italy): a maternal view. Eur J Hum Genet 13: 902-912.
Europe	Europe	Europe	Croatia	Mimice	24	Babalini C, Martínez-Labarga C, Tolk HV, Kivisild T, Giampaolo R, et al. (2005) The population history of the Croatian linguistic minority of Molise (southern Italy): a maternal view. Eur J Hum Genet 13: 902-912.
Europe	Europe	Europe	Croatia	Zaostrog	13	Babalini C, Martínez-Labarga C, Tolk HV, Kivisild T, Giampaolo R, et al. (2005) The population history of the Croatian linguistic minority of Molise (southern Italy): a maternal view. Eur J Hum Genet 13: 902-912.
Europe	Europe	Europe	Cyprus	Greek Cypriots	91	Irwin J, Saunier J, Strouss K, Paintner C, Diegoli T, et al. (2008) Mitochondrial control region sequences from northern Greece and Greek Cypriots. Int J Legal Med 122: 87-89.
Europe	Europe	Europe	Czech Republic	–	89	Richards M, Macaulay V, Hickey E, Vega E, Sykes B, et al. (2000) Tracing European founder lineages in the Near Eastern mtDNA pool. Am J Hum Genet 67: 1251-1276.
Europe	Europe	Europe	Czech Republic	Askhenazi Jewish	11	Behar DM, Hammer MF, Garrigan D, Villems R, Bonne-Tamir B, et al. (2004) MtDNA evidence for a genetic bottleneck in the early history of the Ashkenazi Jewish population. Eur J Hum Genet 12: 355-364.
Europe	Europe	Europe	Czech Republic	Askhenazi Jewish	4	Behar DM, Hammer MF, Garrigan D, Villems R, Bonne-Tamir B, et al. (2004) MtDNA evidence for a genetic bottleneck in the early history of the Ashkenazi Jewish population. Eur J Hum Genet 12: 355-364.
Europe	Europe	Europe	Denmark	–	206	Mikkelsen M, Sørensen E, Rasmussen EM, Morling N (2010) Mitochondrial DNA HV1 and HV2 variation in Danes. Forensic Sci Int Genet in press.
Europe	Europe	Europe	Denmark	–	21	Rasmussen EM, Sorensen E, Eriksen B, Larsen HJ, Morling N (2002) Sequencing strategy of mitochondrial HV1 and HV2 DNA with length heteroplasmy. Forensic Sci Int 129: 209-213.
Europe	Europe	Europe	Denmark	–	44	Richards M, Côrte-Real H, Forster P, Macaulay V, Wilkinson-Herbots H, et al. (1996) Paleolithic and neolithic lineages in the European mitochondrial gene pool. Am J Hum Genet 59: 185-203.
Europe	Europe	Europe	Estonia	Askhenazi Jewish	1	Behar DM, Hammer MF, Garrigan D, Villems R, Bonne-Tamir B, et al. (2004) MtDNA evidence for a genetic bottleneck in the early history of the Ashkenazi Jewish population. Eur J Hum Genet 12: 355-364.
Europe	Europe	Europe	Estonia	–	48	Sajantila A, Lahermo P, Anttinen T, Lukka M, Sistonen P, et al. (1995) Genes and languages in Europe: an analysis of mitochondrial lineages. Genome Res 5: 42-52.
Europe	Europe	Europe	Estonia	–	50	Loogväli E-L, Roostalu U, Malyarchuk BA, Derenko MV, Kivisild T, et al. (2004) Disuniting uniformity: a pied cladistic canvas of mtDNA haplogroup H in Eurasia. Mol Biol Evol 21: 2012-2021.
Europe	Europe	Europe	Estonia	–	101	Richards M, Macaulay V, Hickey E, Vega E, Sykes B, et al. (2000) Tracing European founder lineages in the Near Eastern mtDNA pool. Am J Hum Genet 67: 1251-1276.
Europe	Europe	Europe	Estonia	–	48	Sajantila A, Salem A-H, Savolainen P, Bauer K, Gierig C, et al. (1996) Paternal and maternal DNA lineages reveal a bottleneck in the founding of the Finnish population. Proc Natl Acad Sci U S A 93: 12035-12039.
Europe	Europe	Europe	Finland	Eastern Slavs	12	Malyarchuk BA, Derenko MV (1999) Molecular instability of the mitochondrial haplogroup T sequences at nucleotide positions 16292 and 16296. Ann Hum Genet 63: 489-497.
Europe	Europe	Europe	Finland	Finno-Ugric speakers of the Volga-Ural region	50	Loogväli E-L, Roostalu U, Malyarchuk BA, Derenko MV, Kivisild T, et al. (2004) Disuniting uniformity: a pied cladistic canvas of mtDNA haplogroup H in Eurasia. Mol Biol Evol 21: 2012-2021.
Europe	Europe	Europe	Finland	–	74	Kittles RA, Bergen AW, Urbanek M, Virkkunen M, Linnoila M, et al. (1999) Autosomal, mitochondrial, and Y chromosome DNA variation in Finland: evidence for a male-specific bottleneck. Am J Phys Anthropol 108: 381-399.
Europe	Europe	Europe	Finland	Lapland	22	Lahermo P, Sajantila A, Sistonen P, Lukka M, Aula P, et al. (1996) The genetic relationship between the Finns and the Finnish Saami (Lapps): analysis of nuclear DNA and mtDNA. Am J Hum Genet 58: 1309-1322.
Europe	Europe	Europe	Finland	Nurmo	10	#N/A
Europe	Europe	Europe	Finland	Pyharanta	1	Richards M, Macaulay V, Hickey E, Vega E, Sykes B, et al. (2000) Tracing European founder lineages in the Near Eastern mtDNA pool. Am J Hum Genet 67: 1251-1276.
Europe	Europe	Europe	Finland	Saami	61	Delghandi M, Utsi E, Krauss S (1998) Saami mitochondrial DNA reveals deep maternal lineage clusters. Human Heredity 48: 108-114.
Europe	Europe	Europe	Finland	Saami	115	Sajantila A, Lahermo P, Anttinen T, Lukka M, Sistonen P, et al. (1995) Genes and languages in Europe: an analysis of mitochondrial lineages. Genome Res 5: 42-52.
Europe	Europe	Europe	Finland	southern	33	Richards M, Côrte-Real H, Forster P, Macaulay V, Wilkinson-Herbots H, et al. (1996) Paleolithic and neolithic lineages in the European mitochondrial gene pool. Am J Hum Genet 59: 185-203.
Europe	Europe	Europe	Finland	Volga-Finns	34	Sajantila A, Lahermo P, Anttinen T, Lukka M, Sistonen P, et al. (1995) Genes and languages in Europe: an analysis of mitochondrial lineages. Genome Res 5: 42-52.
Europe	Europe	Europe	Finland	–	32	Lahermo P, Sajantila A, Sistonen P, Lukka M, Aula P, et al. (1996) The genetic relationship between the Finns and the Finnish Saami (Lapps): analysis of nuclear DNA and mtDNA. Am J Hum Genet 58: 1309-1322.
Europe	Europe	Europe	Finland	–	24	Lamminen T, Huoponen K, Sistonen P, Juvonen V, Lahermo P, et al. (1997) mtDNA haplotype analysis in Finnish families with Leber Hereditary Optic Neuroretinopathy. Eur J Hum Genet 5: 271-279.
Europe	Europe	Europe	Finland	–	31	Loogväli E-L, Roostalu U, Malyarchuk BA, Derenko MV, Kivisild T, et al. (2004) Disuniting uniformity: a pied cladistic canvas of mtDNA haplogroup H in Eurasia. Mol Biol Evol 21: 2012-2021.
Europe	Europe	Europe	Finland	–	403	Meinila M, Finnila S, Majamaa K (2001) Evidence for mtDNA admixture between the Finns and the Saami. Hum Hered 52: 160-170.
Europe	Europe	Europe	Finland	–	50	Sajantila A, Lahermo P, Anttinen T, Lukka M, Sistonen P, et al. (1995) Genes and languages in Europe: an analysis of mitochondrial lineages. Genome Res 5: 42-52.
Europe	Europe	Europe	France	Askhenazi Jewish	46	Behar DM, Hammer MF, Garrigan D, Villems R, Bonne-Tamir B, et al. (2004) MtDNA evidence for a genetic bottleneck in the early history of the Ashkenazi Jewish population. Eur J Hum Genet 12: 355-364.
Europe	Europe	Europe	France	Bonifacio area; Southern Corsica	53	Falchi A, Giovannoni L, Calo CM, Piras IS, Moral P, et al. (2006) Genetic history of some western Mediterranean human isolates through mtDNA HVR1 polymorphisms. J Hum Genet 51: 9-14.
Europe	Europe	Europe	France	Brittany, FinistÞre	236	Richard C, Pennarun E, Kivisild T, Tambets K, Tolk HV, et al. (2007) An mtDNA perspective of French genetic variation. Ann Hum Biol 34: 68-79.
Europe	Europe	Europe	France	Brittany, Loire-Atlantique	236	Richard C, Pennarun E, Kivisild T, Tambets K, Tolk HV, et al. (2007) An mtDNA perspective of French genetic variation. Ann Hum Biol 34: 68-79.
Europe	Europe	Europe	France	Brittany, Morbihan	236	Richard C, Pennarun E, Kivisild T, Tambets K, Tolk HV, et al. (2007) An mtDNA perspective of French genetic variation. Ann Hum Biol 34: 68-79.
Europe	Europe	Europe	France	Búarn, Pyrenees-Atlantiques	81	Richard C, Pennarun E, Kivisild T, Tambets K, Tolk HV, et al. (2007) An mtDNA perspective of French genetic variation. Ann Hum Biol 34: 68-79.
Europe	Europe	Europe	France	Corsican	46	Varesi L, Memmi M, Cristofari MC, Mameli GE, Calo CM, et al. (2000) Mitochondrial control-region sequence variation in the Corsican population, France. Am J Hum Biol 12: 339-351.
Europe	Europe	Europe	France	FinistÚre; Brittany	22	Dubut V, Chollet L, Murail P, Cartault F, Beraud-Colomb E, et al. (2004) mtDNA polymorphisms in five French groups: importance of regional sampling. Eur J Hum Genet 12: 293-300.
Europe	Europe	Europe	France	France	50	Rousselet F, Mangin P (1998) Mitochondrial DNA polymorphisms: a study of 50 French Caucasian individuals and application to forensic casework. International Journal of Legal Medicine 111: 292-298.
Europe	Europe	Europe	France	Languedoc, Hurault	85	Richard C, Pennarun E, Kivisild T, Tambets K, Tolk HV, et al. (2007) An mtDNA perspective of French genetic variation. Ann Hum Biol 34: 68-79.
Europe	Europe	Europe	France	Lyonnais, Rhine	46	Richard C, Pennarun E, Kivisild T, Tambets K, Tolk HV, et al. (2007) An mtDNA perspective of French genetic variation. Ann Hum Biol 34: 68-79.
Europe	Europe	Europe	France	Maine-Anjou, Maine et Loire	91	Richard C, Pennarun E, Kivisild T, Tambets K, Tolk HV, et al. (2007) An mtDNA perspective of French genetic variation. Ann Hum Biol 34: 68-79.
Europe	Europe	Europe	France	Morbihan; Brittany	40	Dubut V, Chollet L, Murail P, Cartault F, Beraud-Colomb E, et al. (2004) mtDNA polymorphisms in five French groups: importance of regional sampling. Eur J Hum Genet 12: 293-300.
Europe	Europe	Europe	France	Normandy, Calvados	85	Richard C, Pennarun E, Kivisild T, Tambets K, Tolk HV, et al. (2007) An mtDNA perspective of French genetic variation. Ann Hum Biol 34: 68-79.
Europe	Europe	Europe	France	Normandy; Caux and Bray	85	Dubut V, Chollet L, Murail P, Cartault F, Beraud-Colomb E, et al. (2004) mtDNA polymorphisms in five French groups: importance of regional sampling. Eur J Hum Genet 12: 293-300.
Europe	Europe	Europe	France	Picardie, Somme	79	Richard C, Pennarun E, Kivisild T, Tambets K, Tolk HV, et al. (2007) An mtDNA perspective of French genetic variation. Ann Hum Biol 34: 68-79.
Europe	Europe	Europe	France	Poitou, Vendúe	124	Richard C, Pennarun E, Kivisild T, Tambets K, Tolk HV, et al. (2007) An mtDNA perspective of French genetic variation. Ann Hum Biol 34: 68-79.
Europe	Europe	Europe	France	Poitou, Vienne	124	Richard C, Pennarun E, Kivisild T, Tambets K, Tolk HV, et al. (2007) An mtDNA perspective of French genetic variation. Ann Hum Biol 34: 68-79.
Europe	Europe	Europe	France	Púrigord-Limousin	72	Dubut V, Chollet L, Murail P, Cartault F, Beraud-Colomb E, et al. (2004) mtDNA polymorphisms in five French groups: importance of regional sampling. Eur J Hum Genet 12: 293-300.
Europe	Europe	Europe	France	Var	37	Dubut V, Chollet L, Murail P, Cartault F, Beraud-Colomb E, et al. (2004) mtDNA polymorphisms in five French groups: importance of regional sampling. Eur J Hum Genet 12: 293-300.
Europe	Europe	Europe	France	–	111	Cali F, Le Roux MG, D'Anna R, Flugy A, De Leo G, et al. (2001) MtDNA control region and RFLP data for Sicily and France. Int J Legal Med 114: 229-231.
Europe	Europe	Europe	France	–	50	Loogväli E-L, Roostalu U, Malyarchuk BA, Derenko MV, Kivisild T, et al. (2004) Disuniting uniformity: a pied cladistic canvas of mtDNA haplogroup H in Eurasia. Mol Biol Evol 21: 2012-2021.
Europe	Europe	Europe	France	–	107	Monson KL, Miller KWP, Wilson MR, DiZinno JA, Budowle B (2002) The mtDNA Population Database: an integrated software and database resource for forensic comparison. Forensic Sci Commun 4: no 2.
Europe	Europe	Europe	France	–	80	Richard C, Pennarun E, Kivisild T, Tambets K, Tolk HV, et al. (2007) An mtDNA perspective of French genetic variation. Ann Hum Biol 34: 68-79.
Europe	Europe	Europe	France	–	25	Richards M, Macaulay V, Hickey E, Vega E, Sykes B, et al. (2000) Tracing European founder lineages in the Near Eastern mtDNA pool. Am J Hum Genet 67: 1251-1276.
Europe	Europe	Europe	Germany	Askhenazi Jewish	32	Behar DM, Hammer MF, Garrigan D, Villems R, Bonne-Tamir B, et al. (2004) MtDNA evidence for a genetic bottleneck in the early history of the Ashkenazi Jewish population. Eur J Hum Genet 12: 355-364.
Europe	Europe	Europe	Germany	German-speakers, Hefling	10	Stenico M, Nigro L, Bertorelle G, Calafell F, Capitanio M, et al. (1996) High mitochondrial sequence diversity in linguistic isolates of the Alps. Am J Hum Genet 59: 1363-1375.
Europe	Europe	Europe	Germany	German-speakers, Jenesien	10	Stenico M, Nigro L, Bertorelle G, Calafell F, Capitanio M, et al. (1996) High mitochondrial sequence diversity in linguistic isolates of the Alps. Am J Hum Genet 59: 1363-1375.
Europe	Europe	Europe	Germany	Stuttgart	30	#N/A
Europe	Europe	Europe	Germany	West	50	Baasner A, Schafer C, Junge A, Madea B (1998) Polymorphic sites in human mitochondrial DNA control region sequences: population data and maternal inheritance. Forensic Sci Int 98: 169-178.
Europe	Europe	Europe	Germany	–	1	Álvarez JC, Johnson DE, Lorente JA, Martínez-espin E, Martínez-González LJ, et al. (2007) Characterization of human control region sequences for Spanish individuals in a forensic mtDNA data set. Legal Med 9: 293-304.
Europe	Europe	Europe	Germany	–	31	Brandstätter A, Zimmermann B, Wagner J, Göbel T, Röck A, et al. (2008) Timing and deciphering mitochondrial DNA macro-haplogroup R0 variability in Central Europe and Middle East. BMC Evol Biol 4: 191.
Europe	Europe	Europe	Germany	–	67	Hofmann S, Jaksch M, Bezold R, Mertens S, Aholt S, et al. (1997) Population genetics and disease susceptibility: characterization of central European haplogroups by mtDNA gene mutations, correlations with D loop variants and association with disease. Hum Mol Genet 6: 1835-1846.
Europe	Europe	Europe	Germany	–	200	Lutz S, Weisser HJ, Heizmann J, Pollak S (1998) Location and frequency of polymorphic positions in the mtDNA control region of individuals from Germany. Int J Legal Med 111: 67-77.
Europe	Europe	Europe	Germany	–	109	Pfeiffer H, Brinkmann B, Huhne J, Rolf B, Morris AA, et al. (1999) Expanding the forensic German mitochondrial DNA control region database: genetic diversity as a function of sample size and microgeography. Int J Legal Med 112: 291-298.
Europe	Europe	Europe	Germany	–	1205	Pfeiffer H, Forster P, Ortmann C, Brinkmann B (2001) The results of an mtDNA study of 1200 inhabitants of a German village in comparison to other Caucasian databases and its relevance for forensic casework. International Journal of Legal Medicine 114: 169-172.
Europe	Europe	Europe	Germany	–	167	Richards M, Côrte-Real H, Forster P, Macaulay V, Wilkinson-Herbots H, et al. (1996) Paleolithic and neolithic lineages in the European mitochondrial gene pool. Am J Hum Genet 59: 185-203.
Europe	Europe	Europe	Greece	Argolis	15	Forster P, Cali F, Rohl A, Metspalu E, D'Anna R, et al. (2002) Continental and subcontinental distributions of mtDNA control region types. Int J Legal Med 116: 99-108.
Europe	Europe	Europe	Greece	Chios	15	Forster P, Cali F, Rohl A, Metspalu E, D'Anna R, et al. (2002) Continental and subcontinental distributions of mtDNA control region types. Int J Legal Med 116: 99-108.
Europe	Europe	Europe	Greece	East Macedonia	13	Forster P, Cali F, Rohl A, Metspalu E, D'Anna R, et al. (2002) Continental and subcontinental distributions of mtDNA control region types. Int J Legal Med 116: 99-108.
Europe	Europe	Europe	Greece	Euboea	15	Forster P, Cali F, Rohl A, Metspalu E, D'Anna R, et al. (2002) Continental and subcontinental distributions of mtDNA control region types. Int J Legal Med 116: 99-108.
Europe	Europe	Europe	Greece	Lakonia	15	Forster P, Cali F, Rohl A, Metspalu E, D'Anna R, et al. (2002) Continental and subcontinental distributions of mtDNA control region types. Int J Legal Med 116: 99-108.
Europe	Europe	Europe	Greece	Northern	319	Irwin J, Saunier J, Strouss K, Paintner C, Diegoli T, et al. (2008) Mitochondrial control region sequences from northern Greece and Greek Cypriots. Int J Legal Med 122: 87-89.
Europe	Europe	Europe	Greece	Thrace	25	Bosch E, Calafell F, Gonzalez-Neira A, Flaiz C, Mateu E, et al. (2006) Paternal and maternal lineages in the Balkans show a homogeneous landscape over linguistic barriers, except for the isolated Aromuns. Ann Hum Genet 70: 459-487.
Europe	Europe	Europe	Greece	–	55	Monson KL, Miller KWP, Wilson MR, DiZinno JA, Budowle B (2002) The mtDNA Population Database: an integrated software and database resource for forensic comparison. Forensic Sci Commun 4: no 2.
Europe	Europe	Europe	Greece	–	132	Richards M, Macaulay V, Hickey E, Vega E, Sykes B, et al. (2000) Tracing European founder lineages in the Near Eastern mtDNA pool. Am J Hum Genet 67: 1251-1276.
Europe	Europe	Europe	Greece	–	30	Vernesi C, Di Benedetto G, Caramelli D, Secchieri E, Simoni L, et al. (2001) Genetic characterization of the body attributed to the evangelist Luke. Proc Natl Acad Sci U S A 98: 13460-13463.
Europe	Europe	Europe	Hungary	Ashkenazi Jews; Budapest	173	Brandstätter A, Egyed B, Zimmermann B, Tordai A, Padar Z, et al. (2008) Mitochondrial DNA control region variation in Ashkenazi Jews from Hungary. Forensic Sci Int Genet 2: e4-6.
Europe	Europe	Europe	Hungary	Askhenazi Jewish	29	Behar DM, Hammer MF, Garrigan D, Villems R, Bonne-Tamir B, et al. (2004) MtDNA evidence for a genetic bottleneck in the early history of the Ashkenazi Jewish population. Eur J Hum Genet 12: 355-364.
Europe	Europe	Europe	Hungary	–	71	Brandstätter A, Zimmermann B, Wagner J, Göbel T, Röck A, et al. (2008) Timing and deciphering mitochondrial DNA macro-haplogroup R0 variability in Central Europe and Middle East. BMC Evol Biol 4: 191.
Europe	Europe	Europe	Iceland	–	402	Helgason A, Hickey E, Goodacre S, Bosnes V, Stefánsson K, et al. (2001) mtDNA and the islands of the North Atlantic: estimating the proportions of Norse and Gaelic ancestry. Am J Hum Genet 68: 723-737.
Europe	Europe	Europe	Iceland	–	24	Richards M, Côrte-Real H, Forster P, Macaulay V, Wilkinson-Herbots H, et al. (1996) Paleolithic and neolithic lineages in the European mitochondrial gene pool. Am J Hum Genet 59: 185-203.
Europe	Europe	Europe	Iceland	–	39	Sajantila A, Lahermo P, Anttinen T, Lukka M, Sistonen P, et al. (1995) Genes and languages in Europe: an analysis of mitochondrial lineages. Genome Res 5: 42-52.
Europe	Europe	Europe	Ireland	East	127	McEvoy B, Richards M, Forster P, Bradley DG (2004) The longue duree of genetic ancestry: multiple genetic marker systems and celtic origins on the atlantic facade of europe. Am J Hum Genet 75: 693-702.
Europe	Europe	Europe	Ireland	West	128	McEvoy B, Richards M, Forster P, Bradley DG (2004) The longue duree of genetic ancestry: multiple genetic marker systems and celtic origins on the atlantic facade of europe. Am J Hum Genet 75: 693-702.
Europe	Europe	Europe	Ireland	West	102	Richards M, Macaulay V, Hickey E, Vega E, Sykes B, et al. (2000) Tracing European founder lineages in the Near Eastern mtDNA pool. Am J Hum Genet 67: 1251-1276.
Europe	Europe	Europe	Ireland	–	45	McEvoy B, Richards M, Forster P, Bradley DG (2004) The longue duree of genetic ancestry: multiple genetic marker systems and celtic origins on the atlantic facade of europe. Am J Hum Genet 75: 693-702.
Europe	Europe	Europe	Ireland	–	2	Álvarez JC, Johnson DE, Lorente JA, Martínez-espin E, Martínez-González LJ, et al. (2007) Characterization of human control region sequences for Spanish individuals in a forensic mtDNA data set. Legal Med 9: 293-304.
Europe	Europe	Europe	Karatchaians-Balkanians	–	19	Roostalu U, Kutuev I, Loogväli E-L, Metspalu E, Tambets K, et al. (2007) Origin and expansion of haplogroup H, the dominant human mitochondrial DNA lineage in West Eurasia: the Near Eastern and Caucasian perspective. Mol Biol Evol 24: 436-448.
Europe	Europe	Europe	Latvia	Askhenazi Jewish	8	Behar DM, Hammer MF, Garrigan D, Villems R, Bonne-Tamir B, et al. (2004) MtDNA evidence for a genetic bottleneck in the early history of the Ashkenazi Jewish population. Eur J Hum Genet 12: 355-364.
Europe	Europe	Europe	Latvia	–	299	Pliss L, Tambets K, Loogvali EL, Pronina N, Lazdins M, et al. (2006) Mitochondrial DNA portrait of Latvians: towards the understanding of the genetic structure of Baltic-speaking populations. Ann Hum Genet 70: 439-458.
Europe	Europe	Europe	Lithuania	Lithuanian Roma; Roma Gypsies	18	Gresham D, Morar B, Underhill PA, Passarino G, Lin AA, et al. (2001) Origins and divergence of the Roma (gypsies). Am J Hum Genet 69: 1314-1331.
Europe	Europe	Europe	Lithuania	Askhenazi Jewish	30	Behar DM, Hammer MF, Garrigan D, Villems R, Bonne-Tamir B, et al. (2004) MtDNA evidence for a genetic bottleneck in the early history of the Ashkenazi Jewish population. Eur J Hum Genet 12: 355-364.
Europe	Europe	Europe	Macedonia	Aromuns; Krusevo	33	Bosch E, Calafell F, Gonzalez-Neira A, Flaiz C, Mateu E, et al. (2006) Paternal and maternal lineages in the Balkans show a homogeneous landscape over linguistic barriers, except for the isolated Aromuns. Ann Hum Genet 70: 459-487.
Europe	Europe	Europe	Macedonia	Aromuns; Stip	38	Bosch E, Calafell F, Gonzalez-Neira A, Flaiz C, Mateu E, et al. (2006) Paternal and maternal lineages in the Balkans show a homogeneous landscape over linguistic barriers, except for the isolated Aromuns. Ann Hum Genet 70: 459-487.
Europe	Europe	Europe	Macedonia	Macedonia; Skopje	37	Bosch E, Calafell F, Gonzalez-Neira A, Flaiz C, Mateu E, et al. (2006) Paternal and maternal lineages in the Balkans show a homogeneous landscape over linguistic barriers, except for the isolated Aromuns. Ann Hum Genet 70: 459-487.
Europe	Europe	Europe	Macedonia	–	100	Brandstätter A, Zimmermann B, Wagner J, Göbel T, Röck A, et al. (2008) Timing and deciphering mitochondrial DNA macro-haplogroup R0 variability in Central Europe and Middle East. BMC Evol Biol 4: 191.
Europe	Europe	Europe	Netherlands	Askhenazi Jewish	20	Behar DM, Hammer MF, Garrigan D, Villems R, Bonne-Tamir B, et al. (2004) MtDNA evidence for a genetic bottleneck in the early history of the Ashkenazi Jewish population. Eur J Hum Genet 12: 355-364.
Europe	Europe	Europe	Norway	East	215	Opdal SH, Rognum TO, Vege A, Stave AK, Dupuy BM, et al. (1998) Increased number of substitutions in the D-loop of mitochondrial DNA in the sudden infant death syndrome. Acta Paediatrica 87: 1039-1044.
Europe	Europe	Europe	norway	–	30	Dupuy BM, Olaisen B (1996) mtDNA sequences in the Norwegian Saami and main populations. In: Carracedo A, Brinkmann B, Bär W, editors. Advances in Forensic Haemogenetics. Berlin: Springer-Verlag. pp. 23-25.
Europe	Europe	Europe	norway	–	323	Helgason A, Hickey E, Goodacre S, Bosnes V, Stefánsson K, et al. (2001) mtDNA and the islands of the North Atlantic: estimating the proportions of Norse and Gaelic ancestry. Am J Hum Genet 68: 723-737.
Europe	Europe	Europe	Norway	–	74	Passarino G, Cavalleri GL, Lin AA, Cavalli-Sforza LL, Borresen-Dale AL, et al. (2002) Different genetic components in the Norwegian population revealed by the analysis of mtDNA and Y chromosome polymorphisms. Eur J Hum Genet 10: 521-529.
Europe	Europe	Europe	Norway	–	18	Richards M, Macaulay V, Hickey E, Vega E, Sykes B, et al. (2000) Tracing European founder lineages in the Near Eastern mtDNA pool. Am J Hum Genet 67: 1251-1276.
Europe	Europe	Europe	Ossetia	North	112	Richards M, Macaulay V, Hickey E, Vega E, Sykes B, et al. (2000) Tracing European founder lineages in the Near Eastern mtDNA pool. Am J Hum Genet 67: 1251-1276.
Europe	Europe	Europe	Ossetia	North	25	Roostalu U, Kutuev I, Loogväli E-L, Metspalu E, Tambets K, et al. (2007) Origin and expansion of haplogroup H, the dominant human mitochondrial DNA lineage in West Eurasia: the Near Eastern and Caucasian perspective. Mol Biol Evol 24: 436-448.
Europe	Europe	Europe	Ossetia	South	20	Roostalu U, Kutuev I, Loogväli E-L, Metspalu E, Tambets K, et al. (2007) Origin and expansion of haplogroup H, the dominant human mitochondrial DNA lineage in West Eurasia: the Near Eastern and Caucasian perspective. Mol Biol Evol 24: 436-448.
Europe	Europe	Europe	Poland	Kaszuby; northern	87	Grzybowski T, Malyarchuk BA, Derenko MV, Perkova MA, Bednarek J, et al. (2007) Complex interactions of the Eastern and Western Slavic populations with other European groups as revealed by mitochondrial DNA analysis. Forensic Sci Int Genet 1: 141-147.
Europe	Europe	Europe	Poland	–	34	Richards M, Macaulay V, Hickey E, Vega E, Sykes B, et al. (2000) Tracing European founder lineages in the Near Eastern mtDNA pool. Am J Hum Genet 67: 1251-1276.
Europe	Europe	Europe	Poland	Pomerania Kujawy region	436	Malyarchuk BA, Grzybowski T, Derenko MV, Czarny J, Wozniak M, et al. (2002) Mitochondrial DNA variability in Poles and Russians. Ann Hum Genet 66: 261-283.
Europe	Europe	Europe	Poland	Pomerania-Gdansk; northern	166	Grzybowski T, Malyarchuk BA, Derenko MV, Perkova MA, Bednarek J, et al. (2007) Complex interactions of the Eastern and Western Slavic populations with other European groups as revealed by mitochondrial DNA analysis. Forensic Sci Int Genet 1: 141-147.
Europe	Europe	Europe	Poland	Roma gypsy	69	Malyarchuk BA, Grzybowski T, Derenko MV, Czarny J, Miścicka-Śliwka D (2006) Mitochondrial DNA diversity in the Polish Roma. Ann Hum Genet 70: 195-206.
Europe	Europe	Europe	Poland	Suwalszczyzna; northeast	73	Grzybowski T, Malyarchuk BA, Derenko MV, Perkova MA, Bednarek J, et al. (2007) Complex interactions of the Eastern and Western Slavic populations with other European groups as revealed by mitochondrial DNA analysis. Forensic Sci Int Genet 1: 141-147.
Europe	Europe	Europe	Poland	Upper Silesia; southern	87	Grzybowski T, Malyarchuk BA, Derenko MV, Perkova MA, Bednarek J, et al. (2007) Complex interactions of the Eastern and Western Slavic populations with other European groups as revealed by mitochondrial DNA analysis. Forensic Sci Int Genet 1: 141-147.
Europe	Europe	Europe	Poland	Askhenazi Jewish	565	Behar DM, Hammer MF, Garrigan D, Villems R, Bonne-Tamir B, et al. (2004) MtDNA evidence for a genetic bottleneck in the early history of the Ashkenazi Jewish population. Eur J Hum Genet 12: 355-364.
Europe	Europe	Europe	Portugal	Centre	78	González AM, Brehm A, Pérez JA, Maca-Meyer N, Flores C, et al. (2003) Mitochondrial DNA affinities at the Atlantic fringe of Europe. Am J Phys Anthropol 120: 391-404.
Europe	Europe	Europe	Portugal	Centre	239	Pereira L, Cunha C, Amorim A (2004) Predicting sampling saturation of mtDNA haplotypes: an application to an enlarged Portuguese database. Int J Legal Med 118: 132-136.
Europe	Europe	Europe	Portugal	North	84	González AM, Brehm A, Pérez JA, Maca-Meyer N, Flores C, et al. (2003) Mitochondrial DNA affinities at the Atlantic fringe of Europe. Am J Phys Anthropol 120: 391-404.
Europe	Europe	Europe	Portugal	North	187	Pereira L, Cunha C, Amorim A (2004) Predicting sampling saturation of mtDNA haplotypes: an application to an enlarged Portuguese database. Int J Legal Med 118: 132-136.
Europe	Europe	Europe	Portugal	South	137	González AM, Brehm A, Pérez JA, Maca-Meyer N, Flores C, et al. (2003) Mitochondrial DNA affinities at the Atlantic fringe of Europe. Am J Phys Anthropol 120: 391-404.
Europe	Europe	Europe	Portugal	South	123	Pereira L, Cunha C, Amorim A (2004) Predicting sampling saturation of mtDNA haplotypes: an application to an enlarged Portuguese database. Int J Legal Med 118: 132-136.
Europe	Europe	Europe	Portugal	Torres Novas	50	Richards M, Côrte-Real H, Forster P, Macaulay V, Wilkinson-Herbots H, et al. (1996) Paleolithic and neolithic lineages in the European mitochondrial gene pool. Am J Hum Genet 59: 185-203.
Europe	Europe	Europe	Portugal	–	82	Pereira L, Prata MJ, Amorim A (2000) Diversity of mtDNA lineages in Portugal: not a genetic edge of European variation. Ann Hum Genet 64: 491-506.
Europe	Europe	Europe	Portugal	–	59	Pereira L, Prata MJ, Amorim A (2000) Diversity of mtDNA lineages in Portugal: not a genetic edge of European variation. Ann Hum Genet 64: 491-506.
Europe	Europe	Europe	Portugal	–	100	Pereira L, Prata MJ, Amorim A (2000) Diversity of mtDNA lineages in Portugal: not a genetic edge of European variation. Ann Hum Genet 64: 491-506.
Europe	Europe	Europe	Republic of Kabardia	Kabardia	39	Macaulay V, Richards M, Hickey E, Vega E, Cruciani F, et al. (1999) The emerging tree of West Eurasian mtDNAs: a synthesis of control-region sequences and RFLPs. Am J Hum Genet 64: 232-249.
Europe	Europe	Europe	Republic of Karelia	–	83	Sajantila A, Lahermo P, Anttinen T, Lukka M, Sistonen P, et al. (1995) Genes and languages in Europe: an analysis of mitochondrial lineages. Genome Res 5: 42-52.
Europe	Europe	Europe	Republic of Moldova	Askhenazi Jewish	1	Behar DM, Hammer MF, Garrigan D, Villems R, Bonne-Tamir B, et al. (2004) MtDNA evidence for a genetic bottleneck in the early history of the Ashkenazi Jewish population. Eur J Hum Genet 12: 355-364.
Europe	Europe	Europe	Romania	Aromuns; Kogalniceanu	42	Bosch E, Calafell F, Gonzalez-Neira A, Flaiz C, Mateu E, et al. (2006) Paternal and maternal lineages in the Balkans show a homogeneous landscape over linguistic barriers, except for the isolated Aromuns. Ann Hum Genet 70: 459-487.
Europe	Europe	Europe	Romania	Askhenazi Jewish	93	Behar DM, Hammer MF, Garrigan D, Villems R, Bonne-Tamir B, et al. (2004) MtDNA evidence for a genetic bottleneck in the early history of the Ashkenazi Jewish population. Eur J Hum Genet 12: 355-364.
Europe	Europe	Europe	Romania	Constanta	59	Bosch E, Calafell F, Gonzalez-Neira A, Flaiz C, Mateu E, et al. (2006) Paternal and maternal lineages in the Balkans show a homogeneous landscape over linguistic barriers, except for the isolated Aromuns. Ann Hum Genet 70: 459-487.
Europe	Europe	Europe	Romania	Csángó	182	Brandstätter A, Egyed B, Zimmermann B, Duftner N, Padar Z, et al. (2007) Migration rates and genetic structure of two hungarian ethnic groups in Transylvania, Romania. Ann Hum Genet 71: 791-803.
Europe	Europe	Europe	Romania	Mizia	15	Richards M, Macaulay V, Hickey E, Vega E, Sykes B, et al. (2000) Tracing European founder lineages in the Near Eastern mtDNA pool. Am J Hum Genet 67: 1251-1276.
Europe	Europe	Europe	Romania	Ploiesti	46	Bosch E, Calafell F, Gonzalez-Neira A, Flaiz C, Mateu E, et al. (2006) Paternal and maternal lineages in the Balkans show a homogeneous landscape over linguistic barriers, except for the isolated Aromuns. Ann Hum Genet 70: 459-487.
Europe	Europe	Europe	Romania	Székely	178	Brandstätter A, Egyed B, Zimmermann B, Duftner N, Padar Z, et al. (2007) Migration rates and genetic structure of two hungarian ethnic groups in Transylvania, Romania. Ann Hum Genet 71: 791-803.
Europe	Europe	Europe	Romania	–	124	Brandstätter A, Egyed B, Zimmermann B, Duftner N, Padar Z, et al. (2007) Migration rates and genetic structure of two hungarian ethnic groups in Transylvania, Romania. Ann Hum Genet 71: 791-803.
Europe	Europe	Europe	Romania	–	95	Richards M, Macaulay V, Hickey E, Vega E, Sykes B, et al. (2000) Tracing European founder lineages in the Near Eastern mtDNA pool. Am J Hum Genet 67: 1251-1276.
Europe	Europe	Europe	Russia	Askhenazi Jewish	59	Behar DM, Hammer MF, Garrigan D, Villems R, Bonne-Tamir B, et al. (2004) MtDNA evidence for a genetic bottleneck in the early history of the Ashkenazi Jewish population. Eur J Hum Genet 12: 355-364.
Europe	Europe	Europe	Russia	Chuvash; Chuvashia	36	Richards M, Macaulay V, Hickey E, Vega E, Sykes B, et al. (2000) Tracing European founder lineages in the Near Eastern mtDNA pool. Am J Hum Genet 67: 1251-1276.
Europe	Europe	Europe	Russia	Velikii Novgorod; northwestern of European Russia	79	Grzybowski T, Malyarchuk BA, Derenko MV, Perkova MA, Bednarek J, et al. (2007) Complex interactions of the Eastern and Western Slavic populations with other European groups as revealed by mitochondrial DNA analysis. Forensic Sci Int Genet 1: 141-147.
Europe	Europe	Europe	Russia	Volot; northwestern of European Russia; Novgorod oblast	78	Grzybowski T, Malyarchuk BA, Derenko MV, Perkova MA, Bednarek J, et al. (2007) Complex interactions of the Eastern and Western Slavic populations with other European groups as revealed by mitochondrial DNA analysis. Forensic Sci Int Genet 1: 141-147.
Europe	Europe	Europe	Russia	–	18	Malyarchuk BA, Derenko MV (2001) Mitochondrial DNA variability in Russians and Ukrainians: implication to the origin of the Eastern Slavs. Ann Hum Genet 65: 63-78.
Europe	Europe	Europe	Russia	–	201	Malyarchuk BA, Grzybowski T, Derenko MV, Czarny J, Wozniak M, et al. (2002) Mitochondrial DNA variability in Poles and Russians. Ann Hum Genet 66: 261-283.
Europe	Europe	Europe	Russia	–	103	Orekhov V, Poltoraus A, Zhivotovsky LA, Spitsyn V, Ivanov P, et al. (1999) Mitochondrial DNA sequences diversity in Russians. FEBS Letters 445: 197-201.
Europe	Europe	Europe	Scotland	Mainland Scotland; Western Islands; Isla of Skye	1341	Helgason A, Hickey E, Goodacre S, Bosnes V, Stefánsson K, et al. (2001) mtDNA and the islands of the North Atlantic: estimating the proportions of Norse and Gaelic ancestry. Am J Hum Genet 68: 723-737.
Europe	Europe	Europe	Serbia	Vojvodina Province	104	Zgonjanin D, Veselinović I, Kubat M, Furač I, Antov M, et al. (2010) Sequence polymorphism of the mitochondrial DNA control region in the population of Vojvodina Province, Serbia. Leg Med (Tokyo) 12: 104-107.
Europe	Europe	Europe	Serbia	–	66	#N/A
Europe	Europe	Europe	Siberia	Evenki; Siberia	71	Starikovskaya EB, Sukernik RI, Derbeneva OA, Volodko NV, Ruiz-Pesini E, et al. (2005) Mitochondrial DNA diversity in indigenous populations of the southern extent of Siberia, and the origins of Native American haplogroups. Ann Hum Genet 69: 67-89.
Europe	Europe	Europe	Siberia	Mansi, Siberia	98	Derbeneva OA, Starikovskaya EB, Wallace DC, Sukernik RI (2002) Traces of early Eurasians in the Mansi of northwest Siberia revealed by mitochondrial DNA analysis. Am J Hum Genet 70: 1009-1014.
Europe	Europe	Europe	Siberia	Negidal; Siberia	33	Starikovskaya EB, Sukernik RI, Derbeneva OA, Volodko NV, Ruiz-Pesini E, et al. (2005) Mitochondrial DNA diversity in indigenous populations of the southern extent of Siberia, and the origins of Native American haplogroups. Ann Hum Genet 69: 67-89.
Europe	Europe	Europe	Siberia	Nivkhi; Siberia	56	Starikovskaya EB, Sukernik RI, Derbeneva OA, Volodko NV, Ruiz-Pesini E, et al. (2005) Mitochondrial DNA diversity in indigenous populations of the southern extent of Siberia, and the origins of Native American haplogroups. Ann Hum Genet 69: 67-89.
Europe	Europe	Europe	Siberia	Tofolar; former Karagas; Siberia	46	Starikovskaya EB, Sukernik RI, Derbeneva OA, Volodko NV, Ruiz-Pesini E, et al. (2005) Mitochondrial DNA diversity in indigenous populations of the southern extent of Siberia, and the origins of Native American haplogroups. Ann Hum Genet 69: 67-89.
Europe	Europe	Europe	Siberia	Tubular; Siberia	72	Starikovskaya EB, Sukernik RI, Derbeneva OA, Volodko NV, Ruiz-Pesini E, et al. (2005) Mitochondrial DNA diversity in indigenous populations of the southern extent of Siberia, and the origins of Native American haplogroups. Ann Hum Genet 69: 67-89.
Europe	Europe	Europe	Siberia	Tuvan; Siberia	96	Starikovskaya EB, Sukernik RI, Derbeneva OA, Volodko NV, Ruiz-Pesini E, et al. (2005) Mitochondrial DNA diversity in indigenous populations of the southern extent of Siberia, and the origins of Native American haplogroups. Ann Hum Genet 69: 67-89.
Europe	Europe	Europe	Siberia	Udegey; Siberia	46	Starikovskaya EB, Sukernik RI, Derbeneva OA, Volodko NV, Ruiz-Pesini E, et al. (2005) Mitochondrial DNA diversity in indigenous populations of the southern extent of Siberia, and the origins of Native American haplogroups. Ann Hum Genet 69: 67-89.
Europe	Europe	Europe	Siberia	Ulchi; Siberia	87	Starikovskaya EB, Sukernik RI, Derbeneva OA, Volodko NV, Ruiz-Pesini E, et al. (2005) Mitochondrial DNA diversity in indigenous populations of the southern extent of Siberia, and the origins of Native American haplogroups. Ann Hum Genet 69: 67-89.
Europe	Europe	Europe	Slovak	–	374	Lehocký I, Baldovič M, Kádaši L, Metspalu E (2008) A database of mitochondrial DNA hypervariable regions I and II sequences of individuals from Slovakia. Forensic Sci Int Genet 2: e53-59.
Europe	Europe	Europe	Slovakia	–	129	#N/A
Europe	Europe	Europe	Slovakia	–	50	Loogväli E-L, Roostalu U, Malyarchuk BA, Derenko MV, Kivisild T, et al. (2004) Disuniting uniformity: a pied cladistic canvas of mtDNA haplogroup H in Eurasia. Mol Biol Evol 21: 2012-2021.
Europe	Europe	Europe	Slovenia	–	104	Malyarchuk BA, Grzybowski T, Derenko MV, Czarny J, Drobnic K, et al. (2003) Mitochondrial DNA variability in Bosnians and Slovenians. Ann Hum Genet 67: 412-425.
Europe	Europe	Europe	Slovenia	–	129	Zupanič-Pajnič I, Balažic J, Komel R (2004) Sequence polymorphism of the mitochondrial DNA control region in the Slovenian population. Int J Legal Med 118: 1-4.
Europe	Europe	Europe	Spain	A Coruña; Galicia	17	Álvarez JC, Johnson DE, Lorente JA, Martínez-espin E, Martínez-González LJ, et al. (2007) Characterization of human control region sequences for Spanish individuals in a forensic mtDNA data set. Legal Med 9: 293-304.
Europe	Europe	Europe	Spain	Alava; Basque Country	2	Álvarez JC, Johnson DE, Lorente JA, Martínez-espin E, Martínez-González LJ, et al. (2007) Characterization of human control region sequences for Spanish individuals in a forensic mtDNA data set. Legal Med 9: 293-304.
Europe	Europe	Europe	Spain	Albacete	4	Álvarez JC, Johnson DE, Lorente JA, Martínez-espin E, Martínez-González LJ, et al. (2007) Characterization of human control region sequences for Spanish individuals in a forensic mtDNA data set. Legal Med 9: 293-304.
Europe	Europe	Europe	Spain	Alicante	16	Álvarez JC, Johnson DE, Lorente JA, Martínez-espin E, Martínez-González LJ, et al. (2007) Characterization of human control region sequences for Spanish individuals in a forensic mtDNA data set. Legal Med 9: 293-304.
Europe	Europe	Europe	Spain	Aliste; Zamora	32	Alvarez L, Santos C, Ramos A, Pratdesaba R, Francalacci P, et al. (2010) Mitochondrial DNA patterns in the Iberian Northern plateau: population dynamics and substructure of the Zamora province. Am J Phys Anthropol 142: 531-539.
Europe	Europe	Europe	Spain	Almeria	2	Álvarez JC, Johnson DE, Lorente JA, Martínez-espin E, Martínez-González LJ, et al. (2007) Characterization of human control region sequences for Spanish individuals in a forensic mtDNA data set. Legal Med 9: 293-304.
Europe	Europe	Europe	Spain	Andalucia	15	Côrte-Real HBSM, Macaulay VA, Richards MB, Hariti G, Issad MS, et al. (1996) Genetic diversity in the Iberian peninsula determined from mitochondrial sequence analysis. Ann Hum Genet 60: 331-350.
Europe	Europe	Europe	Spain	Andalucia	50	Larruga JM, Diez F, Pinto FM, Flores C, Gonzalez AM (2001) Mitochondrial DNA characterisation of European isolates: the Maragatos from Spain. Eur J Hum Genet 9: 708-716.
Europe	Europe	Europe	Spain	Andalucia	419	#N/A
Europe	Europe	Europe	Spain	Andalucia	49	Plaza S, Calafell F, Helal A, Bouzerna N, Lefranc G, et al. (2003) Joining the pillars of Hercules: mtDNA sequences show multidirectional gene flow in the western Mediterranean. Ann Hum Genet 67: 312-328.
Europe	Europe	Europe	Spain	Arratia Valley; Biscay province and the Goiherri region; Guipúzcoa province	55	Alonso-Sánchez MA, Cardoso S, Martínez-Bouzas C, Peña JA, Herrera RJ, et al. (2008) Mitochondrial DNA haplogroup diversity in Basques: a reassessment based on HVI and HVII polymorphisms. Am J Hum Biol 20: 154–164.
Europe	Europe	Europe	Spain	Astorga; Leon	61	Larruga JM, Diez F, Pinto FM, Flores C, Gonzalez AM (2001) Mitochondrial DNA characterisation of European isolates: the Maragatos from Spain. Eur J Hum Genet 9: 708-716.
Europe	Europe	Europe	Spain	Asturias	13	Álvarez JC, Johnson DE, Lorente JA, Martínez-espin E, Martínez-González LJ, et al. (2007) Characterization of human control region sequences for Spanish individuals in a forensic mtDNA data set. Legal Med 9: 293-304.
Europe	Europe	Europe	Spain	Badajoz	2	Álvarez JC, Johnson DE, Lorente JA, Martínez-espin E, Martínez-González LJ, et al. (2007) Characterization of human control region sequences for Spanish individuals in a forensic mtDNA data set. Legal Med 9: 293-304.
Europe	Europe	Europe	Spain	Bajo Duero; Zamora	35	Alvarez L, Santos C, Ramos A, Pratdesaba R, Francalacci P, et al. (2010) Mitochondrial DNA patterns in the Iberian Northern plateau: population dynamics and substructure of the Zamora province. Am J Phys Anthropol 142: 531-539.
Europe	Europe	Europe	Spain	Balearic islands	6	Álvarez JC, Johnson DE, Lorente JA, Martínez-espin E, Martínez-González LJ, et al. (2007) Characterization of human control region sequences for Spanish individuals in a forensic mtDNA data set. Legal Med 9: 293-304.
Europe	Europe	Europe	Spain	Barcelona	23	Álvarez JC, Johnson DE, Lorente JA, Martínez-espin E, Martínez-González LJ, et al. (2007) Characterization of human control region sequences for Spanish individuals in a forensic mtDNA data set. Legal Med 9: 293-304.
Europe	Europe	Europe	Spain	Barcelona	23	Álvarez JC, Johnson DE, Lorente JA, Martínez-espin E, Martínez-González LJ, et al. (2007) Characterization of human control region sequences for Spanish individuals in a forensic mtDNA data set. Legal Med 9: 293-304.
Europe	Europe	Europe	Spain	Basque country	45	Bertranpetit J, Sala J, Calafell F, Underhill PA, Moral P, et al. (1995) Human mitochondrial DNA variation and the origin of Basques. Ann Hum Genet 59: 63-81.
Europe	Europe	Europe	Spain	Basque country	50	Richards M, Côrte-Real H, Forster P, Macaulay V, Wilkinson-Herbots H, et al. (1996) Paleolithic and neolithic lineages in the European mitochondrial gene pool. Am J Hum Genet 59: 185-203.
Europe	Europe	Europe	Spain	Basque country	50	Richards M, Macaulay V, Hickey E, Vega E, Sykes B, et al. (2000) Tracing European founder lineages in the Near Eastern mtDNA pool. Am J Hum Genet 67: 1251-1276.
Europe	Europe	Europe	Spain	Benavente; Zamora	38	Alvarez L, Santos C, Ramos A, Pratdesaba R, Francalacci P, et al. (2010) Mitochondrial DNA patterns in the Iberian Northern plateau: population dynamics and substructure of the Zamora province. Am J Phys Anthropol 142: 531-539.
Europe	Europe	Europe	Spain	Cáceres	3	Álvarez JC, Johnson DE, Lorente JA, Martínez-espin E, Martínez-González LJ, et al. (2007) Characterization of human control region sequences for Spanish individuals in a forensic mtDNA data set. Legal Med 9: 293-304.
Europe	Europe	Europe	Spain	Cádiz; Andalucia	10	Álvarez JC, Johnson DE, Lorente JA, Martínez-espin E, Martínez-González LJ, et al. (2007) Characterization of human control region sequences for Spanish individuals in a forensic mtDNA data set. Legal Med 9: 293-304.
Europe	Europe	Europe	Spain	Campos-Pan; Zamora	40	Alvarez L, Santos C, Ramos A, Pratdesaba R, Francalacci P, et al. (2010) Mitochondrial DNA patterns in the Iberian Northern plateau: population dynamics and substructure of the Zamora province. Am J Phys Anthropol 142: 531-539.
Europe	Europe	Europe	Spain	Cantabria	11	Álvarez JC, Johnson DE, Lorente JA, Martínez-espin E, Martínez-González LJ, et al. (2007) Characterization of human control region sequences for Spanish individuals in a forensic mtDNA data set. Legal Med 9: 293-304.
Europe	Europe	Europe	Spain	Cantabria	135	Álvarez-Iglesias V, Mosquera-Miguel A, Cerezo M, Quintáns B, Zarrabeitia MT, et al. (2009) New population and phylogenetic features of the internal variation within mitochondrial DNA macro-haplogroup R0. PLoS ONE 4: e5112.
Europe	Europe	Europe	Spain	Cantabria	88	Maca-Meyer N, Sánchez-Velasco P, Flores C, Larruga JM, González AM, et al. (2003) Y chromosome and mitochondrial DNA characterization of Pasiegos, a human isolate from Cantabria (Spain). Ann Hum Genet 67: 329-339.
Europe	Europe	Europe	Spain	Castellón	6	Álvarez JC, Johnson DE, Lorente JA, Martínez-espin E, Martínez-González LJ, et al. (2007) Characterization of human control region sequences for Spanish individuals in a forensic mtDNA data set. Legal Med 9: 293-304.
Europe	Europe	Europe	Spain	Castilla	38	Larruga JM, Diez F, Pinto FM, Flores C, Gonzalez AM (2001) Mitochondrial DNA characterisation of European isolates: the Maragatos from Spain. Eur J Hum Genet 9: 708-716.
Europe	Europe	Europe	Spain	Catalonia	101	Álvarez-Iglesias V, Mosquera-Miguel A, Cerezo M, Quintáns B, Zarrabeitia MT, et al. (2009) New population and phylogenetic features of the internal variation within mitochondrial DNA macro-haplogroup R0. PLoS ONE 4: e5112.
Europe	Europe	Europe	Spain	Catalonia	15	Côrte-Real HBSM, Macaulay VA, Richards MB, Hariti G, Issad MS, et al. (1996) Genetic diversity in the Iberian peninsula determined from mitochondrial sequence analysis. Ann Hum Genet 60: 331-350.
Europe	Europe	Europe	Spain	Catalonia	118	Crespillo M, Luque JA, Paredes M, Fernández R, Ramirez E, et al. (2000) Mitochondrial DNA sequences for 118 individuals from northeastern Spain. Int J Legal Med 114: 130-132.
Europe	Europe	Europe	Spain	Catalonia	46	Plaza S, Calafell F, Helal A, Bouzerna N, Lefranc G, et al. (2003) Joining the pillars of Hercules: mtDNA sequences show multidirectional gene flow in the western Mediterranean. Ann Hum Genet 67: 312-328.
Europe	Europe	Europe	Spain	Córdoba; Andalucia	7	Álvarez JC, Johnson DE, Lorente JA, Martínez-espin E, Martínez-González LJ, et al. (2007) Characterization of human control region sequences for Spanish individuals in a forensic mtDNA data set. Legal Med 9: 293-304.
Europe	Europe	Europe	Spain	Galicia	282	Álvarez-Iglesias V, Mosquera-Miguel A, Cerezo M, Quintáns B, Zarrabeitia MT, et al. (2009) New population and phylogenetic features of the internal variation within mitochondrial DNA macro-haplogroup R0. PLoS ONE 4: e5112.
Europe	Europe	Europe	Spain	Galicia	43	González AM, Brehm A, Pérez JA, Maca-Meyer N, Flores C, et al. (2003) Mitochondrial DNA affinities at the Atlantic fringe of Europe. Am J Phys Anthropol 120: 391-404.
Europe	Europe	Europe	Spain	Galicia	92	Salas A, Comas D, Lareu MV, Bertranpetit J, Carracedo Á (1998) mtDNA analysis of the Galician population: a genetic edge of European variation. Eur J Hum Genet 6: 365-375.
Europe	Europe	Europe	Spain	Girona; Catalonia	2	Álvarez JC, Johnson DE, Lorente JA, Martínez-espin E, Martínez-González LJ, et al. (2007) Characterization of human control region sequences for Spanish individuals in a forensic mtDNA data set. Legal Med 9: 293-304.
Europe	Europe	Europe	Spain	Granada province; Andalucia	66	Falchi A, Giovannoni L, Calo CM, Piras IS, Moral P, et al. (2006) Genetic history of some western Mediterranean human isolates through mtDNA HVR1 polymorphisms. J Hum Genet 51: 9-14.
Europe	Europe	Europe	Spain	Granada; Andalucia	10	Álvarez JC, Johnson DE, Lorente JA, Martínez-espin E, Martínez-González LJ, et al. (2007) Characterization of human control region sequences for Spanish individuals in a forensic mtDNA data set. Legal Med 9: 293-304.
Europe	Europe	Europe	Spain	Guipuzcoa	6	Álvarez JC, Johnson DE, Lorente JA, Martínez-espin E, Martínez-González LJ, et al. (2007) Characterization of human control region sequences for Spanish individuals in a forensic mtDNA data set. Legal Med 9: 293-304.
Europe	Europe	Europe	Spain	Huelva	7	Álvarez JC, Johnson DE, Lorente JA, Martínez-espin E, Martínez-González LJ, et al. (2007) Characterization of human control region sequences for Spanish individuals in a forensic mtDNA data set. Legal Med 9: 293-304.
Europe	Europe	Europe	Spain	Huelva	7	Álvarez JC, Johnson DE, Lorente JA, Martínez-espin E, Martínez-González LJ, et al. (2007) Characterization of human control region sequences for Spanish individuals in a forensic mtDNA data set. Legal Med 9: 293-304.
Europe	Europe	Europe	Spain	Huesca	3	Álvarez JC, Johnson DE, Lorente JA, Martínez-espin E, Martínez-González LJ, et al. (2007) Characterization of human control region sequences for Spanish individuals in a forensic mtDNA data set. Legal Med 9: 293-304.
Europe	Europe	Europe	Spain	Jaen; Andalucia	9	Álvarez JC, Johnson DE, Lorente JA, Martínez-espin E, Martínez-González LJ, et al. (2007) Characterization of human control region sequences for Spanish individuals in a forensic mtDNA data set. Legal Med 9: 293-304.
Europe	Europe	Europe	Spain	La Rioja	4	Álvarez JC, Johnson DE, Lorente JA, Martínez-espin E, Martínez-González LJ, et al. (2007) Characterization of human control region sequences for Spanish individuals in a forensic mtDNA data set. Legal Med 9: 293-304.
Europe	Europe	Europe	Spain	Lebaniegos	72	Maca-Meyer N, Sánchez-Velasco P, Flores C, Larruga JM, González AM, et al. (2003) Y chromosome and mitochondrial DNA characterization of Pasiegos, a human isolate from Cantabria (Spain). Ann Hum Genet 67: 329-339.
Europe	Europe	Europe	Spain	León	7	Álvarez JC, Johnson DE, Lorente JA, Martínez-espin E, Martínez-González LJ, et al. (2007) Characterization of human control region sequences for Spanish individuals in a forensic mtDNA data set. Legal Med 9: 293-304.
Europe	Europe	Europe	Spain	Lleida	5	Álvarez JC, Johnson DE, Lorente JA, Martínez-espin E, Martínez-González LJ, et al. (2007) Characterization of human control region sequences for Spanish individuals in a forensic mtDNA data set. Legal Med 9: 293-304.
Europe	Europe	Europe	Spain	Madrid	312	Álvarez JC, Johnson DE, Lorente JA, Martínez-espin E, Martínez-González LJ, et al. (2007) Characterization of human control region sequences for Spanish individuals in a forensic mtDNA data set. Legal Med 9: 293-304.
Europe	Europe	Europe	Spain	Malaga	11	Álvarez JC, Johnson DE, Lorente JA, Martínez-espin E, Martínez-González LJ, et al. (2007) Characterization of human control region sequences for Spanish individuals in a forensic mtDNA data set. Legal Med 9: 293-304.
Europe	Europe	Europe	Spain	Maragatos; Astorga; Leon	49	Larruga JM, Diez F, Pinto FM, Flores C, Gonzalez AM (2001) Mitochondrial DNA characterisation of European isolates: the Maragatos from Spain. Eur J Hum Genet 9: 708-716.
Europe	Europe	Europe	Spain	Murcia	8	Álvarez JC, Johnson DE, Lorente JA, Martínez-espin E, Martínez-González LJ, et al. (2007) Characterization of human control region sequences for Spanish individuals in a forensic mtDNA data set. Legal Med 9: 293-304.
Europe	Europe	Europe	Spain	Navarra	2	Álvarez JC, Johnson DE, Lorente JA, Martínez-espin E, Martínez-González LJ, et al. (2007) Characterization of human control region sequences for Spanish individuals in a forensic mtDNA data set. Legal Med 9: 293-304.
Europe	Europe	Europe	Spain	Ourense	1	Álvarez JC, Johnson DE, Lorente JA, Martínez-espin E, Martínez-González LJ, et al. (2007) Characterization of human control region sequences for Spanish individuals in a forensic mtDNA data set. Legal Med 9: 293-304.
Europe	Europe	Europe	Spain	Palencia	1	Álvarez JC, Johnson DE, Lorente JA, Martínez-espin E, Martínez-González LJ, et al. (2007) Characterization of human control region sequences for Spanish individuals in a forensic mtDNA data set. Legal Med 9: 293-304.
Europe	Europe	Europe	Spain	Pasiegos	82	Maca-Meyer N, Sánchez-Velasco P, Flores C, Larruga JM, González AM, et al. (2003) Y chromosome and mitochondrial DNA characterization of Pasiegos, a human isolate from Cantabria (Spain). Ann Hum Genet 67: 329-339.
Europe	Europe	Europe	Spain	Pontevedra; Galicia	14	Álvarez JC, Johnson DE, Lorente JA, Martínez-espin E, Martínez-González LJ, et al. (2007) Characterization of human control region sequences for Spanish individuals in a forensic mtDNA data set. Legal Med 9: 293-304.
Europe	Europe	Europe	Spain	Salamanca	1	Álvarez JC, Johnson DE, Lorente JA, Martínez-espin E, Martínez-González LJ, et al. (2007) Characterization of human control region sequences for Spanish individuals in a forensic mtDNA data set. Legal Med 9: 293-304.
Europe	Europe	Europe	Spain	Sanabria; Zamora	29	Alvarez L, Santos C, Ramos A, Pratdesaba R, Francalacci P, et al. (2010) Mitochondrial DNA patterns in the Iberian Northern plateau: population dynamics and substructure of the Zamora province. Am J Phys Anthropol 142: 531-539.
Europe	Europe	Europe	Spain	Sayago; Zamora	31	Alvarez L, Santos C, Ramos A, Pratdesaba R, Francalacci P, et al. (2010) Mitochondrial DNA patterns in the Iberian Northern plateau: population dynamics and substructure of the Zamora province. Am J Phys Anthropol 142: 531-539.
Europe	Europe	Europe	Spain	Segovia	2	Álvarez JC, Johnson DE, Lorente JA, Martínez-espin E, Martínez-González LJ, et al. (2007) Characterization of human control region sequences for Spanish individuals in a forensic mtDNA data set. Legal Med 9: 293-304.
Europe	Europe	Europe	Spain	Sevilla	11	Álvarez JC, Johnson DE, Lorente JA, Martínez-espin E, Martínez-González LJ, et al. (2007) Characterization of human control region sequences for Spanish individuals in a forensic mtDNA data set. Legal Med 9: 293-304.
Europe	Europe	Europe	Spain	Soria	2	Álvarez JC, Johnson DE, Lorente JA, Martínez-espin E, Martínez-González LJ, et al. (2007) Characterization of human control region sequences for Spanish individuals in a forensic mtDNA data set. Legal Med 9: 293-304.
Europe	Europe	Europe	Spain	Spanish Roma; Roma Gypsies	25	Gresham D, Morar B, Underhill PA, Passarino G, Lin AA, et al. (2001) Origins and divergence of the Roma (gypsies). Am J Hum Genet 69: 1314-1331.
Europe	Europe	Europe	Spain	Tarragona	12	Álvarez JC, Johnson DE, Lorente JA, Martínez-espin E, Martínez-González LJ, et al. (2007) Characterization of human control region sequences for Spanish individuals in a forensic mtDNA data set. Legal Med 9: 293-304.
Europe	Europe	Europe	Spain	Teruel	1	Álvarez JC, Johnson DE, Lorente JA, Martínez-espin E, Martínez-González LJ, et al. (2007) Characterization of human control region sequences for Spanish individuals in a forensic mtDNA data set. Legal Med 9: 293-304.
Europe	Europe	Europe	Spain	Toledo	7	Álvarez JC, Johnson DE, Lorente JA, Martínez-espin E, Martínez-González LJ, et al. (2007) Characterization of human control region sequences for Spanish individuals in a forensic mtDNA data set. Legal Med 9: 293-304.
Europe	Europe	Europe	Spain	Valencia	11	Álvarez JC, Johnson DE, Lorente JA, Martínez-espin E, Martínez-González LJ, et al. (2007) Characterization of human control region sequences for Spanish individuals in a forensic mtDNA data set. Legal Med 9: 293-304.
Europe	Europe	Europe	Spain	Valencia	42	Picornell A, Gomez-Barbeito L, Tomas C, Castro JA, Ramon MM (2005) Mitochondrial DNA HVRI variation in Balearic populations. Am J Phys Anthropol 128: 119-130.
Europe	Europe	Europe	Spain	Valladolid	2	Álvarez JC, Johnson DE, Lorente JA, Martínez-espin E, Martínez-González LJ, et al. (2007) Characterization of human control region sequences for Spanish individuals in a forensic mtDNA data set. Legal Med 9: 293-304.
Europe	Europe	Europe	Spain	Vizcaya; Basque Country	7	Álvarez JC, Johnson DE, Lorente JA, Martínez-espin E, Martínez-González LJ, et al. (2007) Characterization of human control region sequences for Spanish individuals in a forensic mtDNA data set. Legal Med 9: 293-304.
Europe	Europe	Europe	Spain	Zaragoza	4	Álvarez JC, Johnson DE, Lorente JA, Martínez-espin E, Martínez-González LJ, et al. (2007) Characterization of human control region sequences for Spanish individuals in a forensic mtDNA data set. Legal Med 9: 293-304.
Europe	Europe	Europe	Spain	–	168	#N/A
Europe	Europe	Europe	Spain	–	18	Pinto F, González AM, Hernández M, Larruga JM, Cabrera VM (1996) Genetic relationship between the Canary Islanders and their African and Spanish ancestors inferred from mitochondrial DNA sequences. Ann Hum Genet 60 ( Pt 4): 321-330.
Europe	Europe	Europe	Spain_Balearic islands	Chueta-Sephardic Jews; Balearic Islands	1	Picornell A, Gomez-Barbeito L, Tomas C, Castro JA, Ramon MM (2005) Mitochondrial DNA HVRI variation in Balearic populations. Am J Phys Anthropol 128: 119-130.
Europe	Europe	Europe	Spain_Balearic islands	Ibiza; Balearic Islands	50	Picornell A, Gomez-Barbeito L, Tomas C, Castro JA, Ramon MM (2005) Mitochondrial DNA HVRI variation in Balearic populations. Am J Phys Anthropol 128: 119-130.
Europe	Europe	Europe	Spain_Balearic islands	Majorca; Balearic islands	67	Falchi A, Giovannoni L, Calo CM, Piras IS, Moral P, et al. (2006) Genetic history of some western Mediterranean human isolates through mtDNA HVR1 polymorphisms. J Hum Genet 51: 9-14.
Europe	Europe	Europe	Spain_Balearic islands	Majorca; Balearic Islands	45	Picornell A, Gomez-Barbeito L, Tomas C, Castro JA, Ramon MM (2005) Mitochondrial DNA HVRI variation in Balearic populations. Am J Phys Anthropol 128: 119-130.
Europe	Europe	Europe	Spain_Balearic islands	Minorca; Balearic Islands	46	Picornell A, Gomez-Barbeito L, Tomas C, Castro JA, Ramon MM (2005) Mitochondrial DNA HVRI variation in Balearic populations. Am J Phys Anthropol 128: 119-130.
Europe	Europe	Europe	Spain_Balearic islands	Sephardic Jews; Balearic Islands	47	Picornell A, Gomez-Barbeito L, Tomas C, Castro JA, Ramon MM (2005) Mitochondrial DNA HVRI variation in Balearic populations. Am J Phys Anthropol 128: 119-130.
Europe	Europe	Europe	Sweden	Blekinge/Kristianstad	39	Tillmar AO, Coble MD, Wallerstrom T, Holmlund G (2010) Homogeneity in mitochondrial DNA control region sequences in Swedish subpopulations. Int J Legal Med 124: 91-98.
Europe	Europe	Europe	Sweden	Gotland	40	Tillmar AO, Coble MD, Wallerstrom T, Holmlund G (2010) Homogeneity in mitochondrial DNA control region sequences in Swedish subpopulations. Int J Legal Med 124: 91-98.
Europe	Europe	Europe	Sweden	Lund	28	Kittles RA, Bergen AW, Urbanek M, Virkkunen M, Linnoila M, et al. (1999) Autosomal, mitochondrial, and Y chromosome DNA variation in Finland: evidence for a male-specific bottleneck. Am J Phys Anthropol 108: 381-399.
Europe	Europe	Europe	Sweden	Östergötland/Jönköping	40	Tillmar AO, Coble MD, Wallerstrom T, Holmlund G (2010) Homogeneity in mitochondrial DNA control region sequences in Swedish subpopulations. Int J Legal Med 124: 91-98.
Europe	Europe	Europe	Sweden	Skaraborg	41	Tillmar AO, Coble MD, Wallerstrom T, Holmlund G (2010) Homogeneity in mitochondrial DNA control region sequences in Swedish subpopulations. Int J Legal Med 124: 91-98.
Europe	Europe	Europe	Sweden	Swedish/Saami	39	Tillmar AO, Coble MD, Wallerstrom T, Holmlund G (2010) Homogeneity in mitochondrial DNA control region sequences in Swedish subpopulations. Int J Legal Med 124: 91-98.
Europe	Europe	Europe	Sweden	Uppsala	54	Tillmar AO, Coble MD, Wallerstrom T, Holmlund G (2010) Homogeneity in mitochondrial DNA control region sequences in Swedish subpopulations. Int J Legal Med 124: 91-98.
Europe	Europe	Europe	Sweden	Värmland	42	Tillmar AO, Coble MD, Wallerstrom T, Holmlund G (2010) Homogeneity in mitochondrial DNA control region sequences in Swedish subpopulations. Int J Legal Med 124: 91-98.
Europe	Europe	Europe	Sweden	Västerbotten	40	Tillmar AO, Coble MD, Wallerstrom T, Holmlund G (2010) Homogeneity in mitochondrial DNA control region sequences in Swedish subpopulations. Int J Legal Med 124: 91-98.
Europe	Europe	Europe	Sweden	–	32	Sajantila A, Salem A-H, Savolainen P, Bauer K, Gierig C, et al. (1996) Paternal and maternal DNA lineages reveal a bottleneck in the founding of the Finnish population. Proc Natl Acad Sci U S A 93: 12035-12039.
Europe	Europe	Europe	Switzerland	Southwest	154	Dimo-Simonin N, Grange F, Taroni F, Brandt-Casadevall C, Mangin P (2000) Forensic evaluation of mtDNA in a population from south west Switzerland. International Journal of Legal Medicine 113: 89-97.
Europe	Europe	Europe	Switzerland	–	74	Pult I, Sajantila A, Simanainen J, Georgiev O, Schaffner W, et al. (1994) Mitochondrial DNA sequences from Switzerland reveal striking homogeneity of European populations. Biol Chem Hoppe Seyler 375: 837-840.
Europe	Europe	Europe	–	Eastern Slavs	50	Loogväli E-L, Roostalu U, Malyarchuk BA, Derenko MV, Kivisild T, et al. (2004) Disuniting uniformity: a pied cladistic canvas of mtDNA haplogroup H in Eurasia. Mol Biol Evol 21: 2012-2021.
Europe	Europe	Europe	–	Eastern Slavs	12	Malyarchuk BA, Derenko MV (1999) Molecular instability of the mitochondrial haplogroup T sequences at nucleotide positions 16292 and 16296. Ann Hum Genet 63: 489-497.
Europe	Europe	Europe	Italy	Abruzzo	11	Babalini C, Martínez-Labarga C, Tolk HV, Kivisild T, Giampaolo R, et al. (2005) The population history of the Croatian linguistic minority of Molise (southern Italy): a maternal view. Eur J Hum Genet 13: 902-912.
Europe	Europe	Europe	Italy	Abruzzo	50	Verginelli F, Donati F, Coia V, Boschi I, Palmirotta R, et al. (2003) Variation of the hypervariable region-1 of mitochondrial DNA in central-eastern Italy. J Forensic Sci 48: 443-444.
Europe	Europe	Europe	Italy	Agrigento	79	Forster P, Cali F, Rohl A, Metspalu E, D'Anna R, et al. (2002) Continental and subcontinental distributions of mtDNA control region types. Int J Legal Med 116: 99-108.
Europe	Europe	Europe	Italy	Ancona	73	Turchi C, Buscemi L, Giacchino E, Onofri V, Fendt L, et al. (2009) Polymorphisms of mtDNA control region in Tunisian and Moroccan populations: an enrichment of forensic mtDNA databases with Northern Africa data. Forensic Sci Int Genet 3: 166-172.
Europe	Europe	Europe	Italy	South Apulia	26	Babalini C, Martínez-Labarga C, Tolk HV, Kivisild T, Giampaolo R, et al. (2005) The population history of the Croatian linguistic minority of Molise (southern Italy): a maternal view. Eur J Hum Genet 13: 902-912.
Europe	Europe	Europe	Italy	Arezzo	3	#N/A
Europe	Europe	Europe	Italy	Basilicata	92	Ottoni C, Martinez-Labarga C, Loogvali EL, Pennarun E, Achilli A, et al. (2009) First genetic insight into Libyan Tuaregs: a maternal perspective. Ann Hum Genet 73: 438-448.
Europe	Europe	Europe	Italy	Belvedere	50	#N/A
Europe	Europe	Europe	Italy	Bologna	100	Bini C, Ceccardi S, Luiselli D, Ferri G, Pelotti S, et al. (2003) Different informativeness of the three hypervariable mitochondrial DNA regions in the population of Bologna (Italy). Forensic Sci Int 135: 48-52.
Europe	Europe	Europe	Italy	Bologna	46	Turchi C, Buscemi L, Giacchino E, Onofri V, Fendt L, et al. (2009) Polymorphisms of mtDNA control region in Tunisian and Moroccan populations: an enrichment of forensic mtDNA databases with Northern Africa data. Forensic Sci Int Genet 3: 166-172.
Europe	Europe	Europe	italy	Bolzano	59	Thomas MG, Barnes I, Weale ME, Jones AL, Forster P, et al. (2008) New genetic evidence supports isolation and drift in the Ladin communities of the South Tyrolean Alps but not an ancient origin in the Middle East. Eur J Hum Genet 16: 124-134.
Europe	Europe	Europe	Italy	Calabria	95	Ottoni C, Martinez-Labarga C, Loogvali EL, Pennarun E, Achilli A, et al. (2009) First genetic insight into Libyan Tuaregs: a maternal perspective. Ann Hum Genet 73: 438-448.
Europe	Europe	Europe	Italy	Calabria	294	Rose G, Longo T, Maletta R, Passarino G, Bruni AC, et al. (2008) No evidence of association between frontotemporal dementia and major European mtDNA haplogroups. Eur J Neurol 15: 1006-1008.
Europe	Europe	Europe	Italy	Calabria	294	Rose G, Longo T, Maletta R, Passarino G, Bruni AC, et al. (2008) No evidence of association between frontotemporal dementia and major European mtDNA haplogroups. Eur J Neurol 15: 1006-1008.
Europe	Europe	Europe	Italy	Calabria	294	Rose G, Longo T, Maletta R, Passarino G, Bruni AC, et al. (2008) No evidence of association between frontotemporal dementia and major European mtDNA haplogroups. Eur J Neurol 15: 1006-1008.
Europe	Europe	Europe	Italy	Campania	48	Babalini C, Martínez-Labarga C, Tolk HV, Kivisild T, Giampaolo R, et al. (2005) The population history of the Croatian linguistic minority of Molise (southern Italy): a maternal view. Eur J Hum Genet 13: 902-912.
Europe	Europe	Europe	Italy	Casentino	122	Achilli A, Olivieri A, Pala M, Metspalu E, Fornarino S, et al. (2007) Mitochondrial DNA variation of modern Tuscans supports the near eastern origin of Etruscans. Am J Hum Genet 80: 759-768.
Europe	Europe	Europe	Italy	Catania	40	#N/A
Europe	Europe	Europe	Italy	Chiusi	11	#N/A
Europe	Europe	Europe	Italy	Collevecchio	4	#N/A
Europe	Europe	Europe	Italy	Firenze	48	Turchi C, Buscemi L, Giacchino E, Onofri V, Fendt L, et al. (2009) Polymorphisms of mtDNA control region in Tunisian and Moroccan populations: an enrichment of forensic mtDNA databases with Northern Africa data. Forensic Sci Int Genet 3: 166-172.
Europe	Europe	Europe	Italy	Grecani Salentini; Lecce	47	#N/A
Europe	Europe	Europe	Italy	Isola d'Elba	16	#N/A
Europe	Europe	Europe	Italy	Italian speakers, S Trento	10	Stenico M, Nigro L, Bertorelle G, Calafell F, Capitanio M, et al. (1996) High mitochondrial sequence diversity in linguistic isolates of the Alps. Am J Hum Genet 59: 1363-1375.
Europe	Europe	Europe	Italy	Italy	83	Tagliabracci C, Turchi C, Buscemi L, Sassaroli C (2001) Polymorphism of the mitochondrial DNA control region in Italians. International Journal of Legal Medicine 114: 224-228.
Europe	Europe	Europe	Italy	Italy NE	41	Babalini C, Martínez-Labarga C, Tolk HV, Kivisild T, Giampaolo R, et al. (2005) The population history of the Croatian linguistic minority of Molise (southern Italy): a maternal view. Eur J Hum Genet 13: 902-912.
Europe	Europe	Europe	Italy	Jenne	103	Messina F, Scorrano G, Labarga CM, Rolfo MF, Rickards O (2010) Mitochondrial DNA variation in an isolated area of Central Italy. Ann Hum Biol 37: 385-402.
Europe	Europe	Europe	Italy	Ladin; Val Badia; Brunico	41	#N/A
Europe	Europe	Europe	Italy	Ladins, Colle Santa Lucia	10	Stenico M, Nigro L, Bertorelle G, Calafell F, Capitanio M, et al. (1996) High mitochondrial sequence diversity in linguistic isolates of the Alps. Am J Hum Genet 59: 1363-1375.
Europe	Europe	Europe	Italy	Ladins, Colle Santa Lucia	20	Vernesi C, Fuselli S, Castri L, Bertorelle G, Barbujani G (2002) Mitochondrial diversity in linguistic isolates of the Alps: a reappraisal. Hum Biol 74: 725-730.
Europe	Europe	Europe	Italy	Ladins, Selva Val Gardena/ Wolkenstein	10	Stenico M, Nigro L, Bertorelle G, Calafell F, Capitanio M, et al. (1996) High mitochondrial sequence diversity in linguistic isolates of the Alps. Am J Hum Genet 59: 1363-1375.
Europe	Europe	Europe	Italy	Latium	52	Babalini C, Martínez-Labarga C, Tolk HV, Kivisild T, Giampaolo R, et al. (2005) The population history of the Croatian linguistic minority of Molise (southern Italy): a maternal view. Eur J Hum Genet 13: 902-912.
Europe	Europe	Europe	Italy	Liguri; La Spezia	50	#N/A
Europe	Europe	Europe	Italy	Lower Val Venosta; South Tyrol	55	Pichler I, Mueller JC, Stefanov SA, De Grandi A, Beu Volpato C, et al. (2006) Genetic structure in contemporary South Tyrolean isolated populations revealed by analysis of Y-Chromosome, mtDNA, and Alu polymorphisms. Hum Biol 78: 441-464.
Europe	Europe	Europe	italy	lower Vinschgau; german speakers	52	Thomas MG, Barnes I, Weale ME, Jones AL, Forster P, et al. (2008) New genetic evidence supports isolation and drift in the Ladin communities of the South Tyrolean Alps but not an ancient origin in the Middle East. Eur J Hum Genet 16: 124-134.
Europe	Europe	Europe	Italy	Lucera; Foggia	60	#N/A
Europe	Europe	Europe	Italy	Magliano Sabina	8	#N/A
Europe	Europe	Europe	Italy	South Apulia; Lecce; Salento	53	#N/A
Europe	Europe	Europe	Italy	Mocheni	10	Stenico M, Nigro L, Bertorelle G, Calafell F, Capitanio M, et al. (1996) High mitochondrial sequence diversity in linguistic isolates of the Alps. Am J Hum Genet 59: 1363-1375.
Europe	Europe	Europe	Italy	Modena	44	Turchi C, Buscemi L, Giacchino E, Onofri V, Fendt L, et al. (2009) Polymorphisms of mtDNA control region in Tunisian and Moroccan populations: an enrichment of forensic mtDNA databases with Northern Africa data. Forensic Sci Int Genet 3: 166-172.
Europe	Europe	Europe	Italy	Molise	62	Babalini C, Martínez-Labarga C, Tolk HV, Kivisild T, Giampaolo R, et al. (2005) The population history of the Croatian linguistic minority of Molise (southern Italy): a maternal view. Eur J Hum Genet 13: 902-912.
Europe	Europe	Europe	Italy	Monte Fiascone	4	#N/A
Europe	Europe	Europe	Italy	Murlo	86	Achilli A, Olivieri A, Pala M, Metspalu E, Fornarino S, et al. (2007) Mitochondrial DNA variation of modern Tuscans supports the near eastern origin of Etruscans. Am J Hum Genet 80: 759-768.
Europe	Europe	Europe	Italy	Norma -Sezze; Latini	48	#N/A
Europe	Europe	Europe	Italy	North	3	Di Benedetto G, Nasidze IS, Stenico M, Nigro L, Krings M, et al. (2000) Mitochondrial DNA sequences in prehistoric human remains from the Alps. Eur J Hum Genet 8: 669-677.
Europe	Europe	Europe	Italy	Pavia	47	Turchi C, Buscemi L, Giacchino E, Onofri V, Fendt L, et al. (2009) Polymorphisms of mtDNA control region in Tunisian and Moroccan populations: an enrichment of forensic mtDNA databases with Northern Africa data. Forensic Sci Int Genet 3: 166-172.
Europe	Europe	Europe	Italy	Piceni	53	#N/A
Europe	Europe	Europe	Italy	Pitilgiano	5	#N/A
Europe	Europe	Europe	Italy	Roma	58	Turchi C, Buscemi L, Giacchino E, Onofri V, Fendt L, et al. (2009) Polymorphisms of mtDNA control region in Tunisian and Moroccan populations: an enrichment of forensic mtDNA databases with Northern Africa data. Forensic Sci Int Genet 3: 166-172.
Europe	Europe	Europe	Italy	Sanniti; Benevento; Campania	50	#N/A
Europe	Europe	Europe	Italy	Sardinia	9	Di Rienzo A, Wilson AC (1991) Branching pattern in the evolutionary tree for human mitochondrial DNA. Proc Natl Acad Sci U S A 88: 1597-1601.
Europe	Europe	Europe	Italy	Sciacca	80	Forster P, Cali F, Rohl A, Metspalu E, D'Anna R, et al. (2002) Continental and subcontinental distributions of mtDNA control region types. Int J Legal Med 116: 99-108.
Europe	Europe	Europe	Italy	Sicily	154	Ottoni C, Martinez-Labarga C, Loogvali EL, Pennarun E, Achilli A, et al. (2009) First genetic insight into Libyan Tuaregs: a maternal perspective. Ann Hum Genet 73: 438-448.
Europe	Europe	Europe	Italy	Sicily, Castellammare del Golfo	106	Cali F, Le Roux MG, D'Anna R, Flugy A, De Leo G, et al. (2001) MtDNA control region and RFLP data for Sicily and France. Int J Legal Med 114: 229-231.
Europe	Europe	Europe	Italy	Sicily; Alia	49	Vona G, Ghiani ME, Calo CM, Vacca L, Memmi M, et al. (2001) Mitochondrial DNA sequence analysis in Sicily. Am J Hum Biol 13: 576-589.
Europe	Europe	Europe	Italy	southern Tuscany	49	Francalacci P, Bertranpetit J, Calafell F, Underhill PA (1996) Sequence diversity of the control region of mitochondrial DNA in Tuscany and its implications for the peopling of Europe. Am J Phys Anthropol 100: 443-460.
Europe	Europe	Europe	Italy	Tarquinia	3	#N/A
Europe	Europe	Europe	Italy	Terni	29	Turchi C, Buscemi L, Giacchino E, Onofri V, Fendt L, et al. (2009) Polymorphisms of mtDNA control region in Tunisian and Moroccan populations: an enrichment of forensic mtDNA databases with Northern Africa data. Forensic Sci Int Genet 3: 166-172.
Europe	Europe	Europe	Italy	Torino	50	Turchi C, Buscemi L, Giacchino E, Onofri V, Fendt L, et al. (2009) Polymorphisms of mtDNA control region in Tunisian and Moroccan populations: an enrichment of forensic mtDNA databases with Northern Africa data. Forensic Sci Int Genet 3: 166-172.
Europe	Europe	Europe	Italy	Trapani	40	#N/A
Europe	Europe	Europe	Italy	Tuscania	7	#N/A
Europe	Europe	Europe	Italy	Tuscany	61	Falchi A, Giovannoni L, Calo CM, Piras IS, Moral P, et al. (2006) Genetic history of some western Mediterranean human isolates through mtDNA HVR1 polymorphisms. J Hum Genet 51: 9-14.
Europe	Europe	Europe	Italy	Udine	51	#N/A
Europe	Europe	Europe	Italy	Upper Val Venosta; South Tyrol	58	Pichler I, Mueller JC, Stefanov SA, De Grandi A, Beu Volpato C, et al. (2006) Genetic structure in contemporary South Tyrolean isolated populations revealed by analysis of Y-Chromosome, mtDNA, and Alu polymorphisms. Hum Biol 78: 441-464.
Europe	Europe	Europe	italy	upper Vinschgau; german speakers Italy	50	Thomas MG, Barnes I, Weale ME, Jones AL, Forster P, et al. (2008) New genetic evidence supports isolation and drift in the Ladin communities of the South Tyrolean Alps but not an ancient origin in the Middle East. Eur J Hum Genet 16: 124-134.
Europe	Europe	Europe	italy	Val Badia; Ladin speakers	56	Thomas MG, Barnes I, Weale ME, Jones AL, Forster P, et al. (2008) New genetic evidence supports isolation and drift in the Ladin communities of the South Tyrolean Alps but not an ancient origin in the Middle East. Eur J Hum Genet 16: 124-134.
Europe	Europe	Europe	Italy	Val Badia; South Tyrol	35	Pichler I, Mueller JC, Stefanov SA, De Grandi A, Beu Volpato C, et al. (2006) Genetic structure in contemporary South Tyrolean isolated populations revealed by analysis of Y-Chromosome, mtDNA, and Alu polymorphisms. Hum Biol 78: 441-464.
Europe	Europe	Europe	italy	Val Gardena; Ladin speakers	46	Thomas MG, Barnes I, Weale ME, Jones AL, Forster P, et al. (2008) New genetic evidence supports isolation and drift in the Ladin communities of the South Tyrolean Alps but not an ancient origin in the Middle East. Eur J Hum Genet 16: 124-134.
Europe	Europe	Europe	Italy	Val Isarco; South Tyrol	34	Pichler I, Mueller JC, Stefanov SA, De Grandi A, Beu Volpato C, et al. (2006) Genetic structure in contemporary South Tyrolean isolated populations revealed by analysis of Y-Chromosome, mtDNA, and Alu polymorphisms. Hum Biol 78: 441-464.
Europe	Europe	Europe	Italy	Val Pusteria; South Tyrol	37	Pichler I, Mueller JC, Stefanov SA, De Grandi A, Beu Volpato C, et al. (2006) Genetic structure in contemporary South Tyrolean isolated populations revealed by analysis of Y-Chromosome, mtDNA, and Alu polymorphisms. Hum Biol 78: 441-464.
Europe	Europe	Europe	Italy	Vallepietra	21	Messina F, Scorrano G, Labarga CM, Rolfo MF, Rickards O (2010) Mitochondrial DNA variation in an isolated area of Central Italy. Ann Hum Biol 37: 385-402.
Europe	Europe	Europe	Italy	Veneto: Barco	30	Mogentale-Profizi N, Chollet L, Stévanovitch A, Dubut V, Poggi C, et al. (2001) Mitochondrial DNA sequence diversity in two groups of Italian Veneto speakers from Veneto. Ann Hum Genet 65: 153-166.
Europe	Europe	Europe	Italy	Volterra	114	Achilli A, Olivieri A, Pala M, Metspalu E, Fornarino S, et al. (2007) Mitochondrial DNA variation of modern Tuscans supports the near eastern origin of Etruscans. Am J Hum Genet 80: 759-768.
Europe	Europe	Europe	Italy	Vulci	2	#N/A
Europe	Europe	Europe	Italy	–	188	Richards M, Macaulay V, Hickey E, Vega E, Sykes B, et al. (2000) Tracing European founder lineages in the Near Eastern mtDNA pool. Am J Hum Genet 67: 1251-1276.
Europe	Europe	Europe	Italy	–	38	Mogentale-Profizi N, Chollet L, Stévanovitch A, Dubut V, Poggi C, et al. (2001) Mitochondrial DNA sequence diversity in two groups of Italian Veneto speakers from Veneto. Ann Hum Genet 65: 153-166.
Europe	Europe	Europe	Italy_Sardinia	Gallura providence; Northern Sardinia	50	Falchi A, Giovannoni L, Calo CM, Piras IS, Moral P, et al. (2006) Genetic history of some western Mediterranean human isolates through mtDNA HVR1 polymorphisms. J Hum Genet 51: 9-14.
Europe	Europe	Europe	Italy_Sardinia	Nuoro province; Central Sardinia	51	Falchi A, Giovannoni L, Calo CM, Piras IS, Moral P, et al. (2006) Genetic history of some western Mediterranean human isolates through mtDNA HVR1 polymorphisms. J Hum Genet 51: 9-14.
Europe	Europe	Europe	Italy_Sardinia	San Pietro island; South Sardinia	44	Falchi A, Giovannoni L, Calo CM, Piras IS, Moral P, et al. (2006) Genetic history of some western Mediterranean human isolates through mtDNA HVR1 polymorphisms. J Hum Genet 51: 9-14.
Europe	Europe	Europe	Italy_Sardinia	Sant' Antioco island; South Sardinia	42	Falchi A, Giovannoni L, Calo CM, Piras IS, Moral P, et al. (2006) Genetic history of some western Mediterranean human isolates through mtDNA HVR1 polymorphisms. J Hum Genet 51: 9-14.
Europe	Europe	Europe	Italy_Sardinia	Sardinia	69	Di Rienzo A, Wilson AC (1991) Branching pattern in the evolutionary tree for human mitochondrial DNA. Proc Natl Acad Sci U S A 88: 1597-1601.
Europe	Europe	Europe	Italy_Sardinia	Trexenta; South Sardinia	47	Falchi A, Giovannoni L, Calo CM, Piras IS, Moral P, et al. (2006) Genetic history of some western Mediterranean human isolates through mtDNA HVR1 polymorphisms. J Hum Genet 51: 9-14.
Near East	Near East	Near East	Afghanistan	–		Richards M, Macaulay V, Hickey E, Vega E, Sykes B, et al. (2000) Tracing European founder lineages in the Near Eastern mtDNA pool. Am J Hum Genet 67: 1251-1276.
Near East	Near East	Near East	Afghanistan/Pakistan	Hazara; North West Frontier Province and Baloshistan	23	Quintana-Murci L, Chaix R, Wells RS, Behar DM, Sayar H, et al. (2004) Where west meets east: the complex mtDNA landscape of the southwest and Central Asian corridor. Am J Hum Genet 74: 827-845.
Near East	Near East	Near East	Afghanistan/Pakistan/Tajikistan	Kalash; North West Frontier Province	44	Quintana-Murci L, Chaix R, Wells RS, Behar DM, Sayar H, et al. (2004) Where west meets east: the complex mtDNA landscape of the southwest and Central Asian corridor. Am J Hum Genet 74: 827-845.
Near East	Near East	Near East	Armenia	–	42	Nasidze I, Stoneking M (2001) Mitochondrial DNA variation and language replacements in the Caucasus. P Roy Soc Lond B Bio 268: 1197-1206.
Near East	Near East	Near East	Armenia	–	5	Reidla M, Kivisild T, Metspalu E, Kaldma K, Tambets K, et al. (2003) Origin and diffusion of mtDNA haplogroup X. Am J Hum Genet 73: 1178-1190.
Near East	Near East	Near East	Armenia	–	193	Richards M, Macaulay V, Hickey E, Vega E, Sykes B, et al. (2000) Tracing European founder lineages in the Near Eastern mtDNA pool. Am J Hum Genet 67: 1251-1276.
Near East	Near East	Near East	Armenia	–	54	Roostalu U, Kutuev I, Loogväli E-L, Metspalu E, Tambets K, et al. (2007) Origin and expansion of haplogroup H, the dominant human mitochondrial DNA lineage in West Eurasia: the Near Eastern and Caucasian perspective. Mol Biol Evol 24: 436-448.
Near East	Near East	Near East	Azerbaijan	Turkish; mostly eastern and western Azerbaijan	40	Quintana-Murci L, Chaix R, Wells RS, Behar DM, Sayar H, et al. (2004) Where west meets east: the complex mtDNA landscape of the southwest and Central Asian corridor. Am J Hum Genet 74: 827-845.
Near East	Near East	Near East	Azerbaijan	–	41	Nasidze I, Stoneking M (2001) Mitochondrial DNA variation and language replacements in the Caucasus. P Roy Soc Lond B Bio 268: 1197-1206.
Near East	Near East	Near East	Azerbaijan	–	49	Richards M, Macaulay V, Hickey E, Vega E, Sykes B, et al. (2000) Tracing European founder lineages in the Near Eastern mtDNA pool. Am J Hum Genet 67: 1251-1276.
Near East	Near East	Near East	Balkans	Balkans	20	Quintana-Murci L, Chaix R, Wells RS, Behar DM, Sayar H, et al. (2004) Where west meets east: the complex mtDNA landscape of the southwest and Central Asian corridor. Am J Hum Genet 74: 827-845.
Near East	Near East	Near East	Bulgaria	–	1	Richards M, Côrte-Real H, Forster P, Macaulay V, Wilkinson-Herbots H, et al. (1996) Paleolithic and neolithic lineages in the European mitochondrial gene pool. Am J Hum Genet 59: 185-203.
Near East	Near East	Near East	Caucasus	Abazin	4	Reidla M, Kivisild T, Metspalu E, Kaldma K, Tambets K, et al. (2003) Origin and diffusion of mtDNA haplogroup X. Am J Hum Genet 73: 1178-1190.
Near East	Near East	Near East	Caucasus	Abazin; North Caucasus	12	Roostalu U, Kutuev I, Loogväli E-L, Metspalu E, Tambets K, et al. (2007) Origin and expansion of haplogroup H, the dominant human mitochondrial DNA lineage in West Eurasia: the Near Eastern and Caucasian perspective. Mol Biol Evol 24: 436-448.
Near East	Near East	Near East	Caucasus	Adygey; Northwest Caucasus	69	Roostalu U, Kutuev I, Loogväli E-L, Metspalu E, Tambets K, et al. (2007) Origin and expansion of haplogroup H, the dominant human mitochondrial DNA lineage in West Eurasia: the Near Eastern and Caucasian perspective. Mol Biol Evol 24: 436-448.
Near East	Near East	Near East	Caucasus	Georgia, S. Caucasus	45	Comas D, Calafell F, Bendukidze N, Fananas L, Bertranpetit J (2000) Georgian and kurd mtDNA sequence analysis shows a lack of correlation between languages and female genetic lineages. Am J Phys Anthropol 112: 5-16.
Near East	Near East	Near East	Chechenia	Chechinia	18	Quintana-Murci L, Chaix R, Wells RS, Behar DM, Sayar H, et al. (2004) Where west meets east: the complex mtDNA landscape of the southwest and Central Asian corridor. Am J Hum Genet 74: 827-845.
Near East	Near East	Near East	Ethiopia	Jewish	45	Non AL, Al-Meeri A, Raaum RL, Sanchez LF, Mulligan CJ (2011) Mitochondrial DNA reveals distinct evolutionary histories for Jewish populations in Yemen and Ethiopia. Am J Phys Anthropol 144: 1-10.
Near East	Near East	Near East	Georgia	–	57	Nasidze I, Stoneking M (2001) Mitochondrial DNA variation and language replacements in the Caucasus. P Roy Soc Lond B Bio 268: 1197-1206.
Near East	Near East	Near East	Georgia	–	20	Quintana-Murci L, Chaix R, Wells RS, Behar DM, Sayar H, et al. (2004) Where west meets east: the complex mtDNA landscape of the southwest and Central Asian corridor. Am J Hum Genet 74: 827-845.
Near East	Near East	Near East	Georgia	–	24	Reidla M, Kivisild T, Metspalu E, Kaldma K, Tambets K, et al. (2003) Origin and diffusion of mtDNA haplogroup X. Am J Hum Genet 73: 1178-1190.
Near East	Near East	Near East	Georgia	–	30	Roostalu U, Kutuev I, Loogväli E-L, Metspalu E, Tambets K, et al. (2007) Origin and expansion of haplogroup H, the dominant human mitochondrial DNA lineage in West Eurasia: the Near Eastern and Caucasian perspective. Mol Biol Evol 24: 436-448.
Near East	Near East	Near East	India	Gujariti; Northwestern India, Gujarat	34	Quintana-Murci L, Chaix R, Wells RS, Behar DM, Sayar H, et al. (2004) Where west meets east: the complex mtDNA landscape of the southwest and Central Asian corridor. Am J Hum Genet 74: 827-845.
Near East	Near East	Near East	Iran	central	36	Metspalu M, Kivisild T, Metspalu E, Parik J, Hudjashov G, et al. (2004) Most of the extant mtDNA boundaries in south and southwest Asia were likely shaped during the initial settlement of Eurasia by anatomically modern humans. BMC Genet 5: 26.
Near East	Near East	Near East	Iran	Gilaki; Northern Iran, southwestern Caspian Sea area	37	Quintana-Murci L, Chaix R, Wells RS, Behar DM, Sayar H, et al. (2004) Where west meets east: the complex mtDNA landscape of the southwest and Central Asian corridor. Am J Hum Genet 74: 827-845.
Near East	Near East	Near East	Iran	Kurdish; Western	20	Quintana-Murci L, Chaix R, Wells RS, Behar DM, Sayar H, et al. (2004) Where west meets east: the complex mtDNA landscape of the southwest and Central Asian corridor. Am J Hum Genet 74: 827-845.
Near East	Near East	Near East	Iran	Lur; Southwestern Iran; Zagros Mountains	17	Quintana-Murci L, Chaix R, Wells RS, Behar DM, Sayar H, et al. (2004) Where west meets east: the complex mtDNA landscape of the southwest and Central Asian corridor. Am J Hum Genet 74: 827-845.
Near East	Near East	Near East	Iran	Mazandarian; Northern Iran; southeastern Caspian Sea area	21	Quintana-Murci L, Chaix R, Wells RS, Behar DM, Sayar H, et al. (2004) Where west meets east: the complex mtDNA landscape of the southwest and Central Asian corridor. Am J Hum Genet 74: 827-845.
Near East	Near East	Near East	Iran	northeast	30	Metspalu M, Kivisild T, Metspalu E, Parik J, Hudjashov G, et al. (2004) Most of the extant mtDNA boundaries in south and southwest Asia were likely shaped during the initial settlement of Eurasia by anatomically modern humans. BMC Genet 5: 26.
Near East	Near East	Near East	Iran	northwest	226	Metspalu M, Kivisild T, Metspalu E, Parik J, Hudjashov G, et al. (2004) Most of the extant mtDNA boundaries in south and southwest Asia were likely shaped during the initial settlement of Eurasia by anatomically modern humans. BMC Genet 5: 26.
Near East	Near East	Near East	Iran	Persian; Central and southern central Iran	42	Quintana-Murci L, Chaix R, Wells RS, Behar DM, Sayar H, et al. (2004) Where west meets east: the complex mtDNA landscape of the southwest and Central Asian corridor. Am J Hum Genet 74: 827-845.
Near East	Near East	Near East	Iran	southeast	6	Metspalu M, Kivisild T, Metspalu E, Parik J, Hudjashov G, et al. (2004) Most of the extant mtDNA boundaries in south and southwest Asia were likely shaped during the initial settlement of Eurasia by anatomically modern humans. BMC Genet 5: 26.
Near East	Near East	Near East	Iran	southwest	138	Metspalu M, Kivisild T, Metspalu E, Parik J, Hudjashov G, et al. (2004) Most of the extant mtDNA boundaries in south and southwest Asia were likely shaped during the initial settlement of Eurasia by anatomically modern humans. BMC Genet 5: 26.
Near East	Near East	Near East	Iran	–	14	Reidla M, Kivisild T, Metspalu E, Kaldma K, Tambets K, et al. (2003) Origin and diffusion of mtDNA haplogroup X. Am J Hum Genet 73: 1178-1190.
Near East	Near East	Near East	Iran	–	12	Richards M, Côrte-Real H, Forster P, Macaulay V, Wilkinson-Herbots H, et al. (1996) Paleolithic and neolithic lineages in the European mitochondrial gene pool. Am J Hum Genet 59: 185-203.
Near East	Near East	Near East	Iran	–	12	Richards M, Macaulay V, Hickey E, Vega E, Sykes B, et al. (2000) Tracing European founder lineages in the Near Eastern mtDNA pool. Am J Hum Genet 67: 1251-1276.
Near East	Near East	Near East	Iraq	–	52	#N/A
Near East	Near East	Near East	Iraq	–	117	Richards M, Macaulay V, Hickey E, Vega E, Sykes B, et al. (2000) Tracing European founder lineages in the Near Eastern mtDNA pool. Am J Hum Genet 67: 1251-1276.
Near East	Near East	Near East	Israel	Druze	45	Macaulay V, Richards M, Hickey E, Vega E, Cruciani F, et al. (1999) The emerging tree of West Eurasian mtDNAs: a synthesis of control-region sequences and RFLPs. Am J Hum Genet 64: 232-249.
Near East	Near East	Near East	Israel	–	8	Di Rienzo A, Wilson AC (1991) Branching pattern in the evolutionary tree for human mitochondrial DNA. Proc Natl Acad Sci U S A 88: 1597-1601.
Near East	Near East	Near East	Israel	–	109	Richards M, Macaulay V, Hickey E, Vega E, Sykes B, et al. (2000) Tracing European founder lineages in the Near Eastern mtDNA pool. Am J Hum Genet 67: 1251-1276.
Near East	Near East	Near East	Jordan	–	171	Reidla M, Kivisild T, Metspalu E, Kaldma K, Tambets K, et al. (2003) Origin and diffusion of mtDNA haplogroup X. Am J Hum Genet 73: 1178-1190.
Near East	Near East	Near East	Jordan	–	33	Roostalu U, Kutuev I, Loogväli E-L, Metspalu E, Tambets K, et al. (2007) Origin and expansion of haplogroup H, the dominant human mitochondrial DNA lineage in West Eurasia: the Near Eastern and Caucasian perspective. Mol Biol Evol 24: 436-448.
Near East	Near East	Near East	Karatchaians-Balkanians	Balkanians; Balkans	31	Roostalu U, Kutuev I, Loogväli E-L, Metspalu E, Tambets K, et al. (2007) Origin and expansion of haplogroup H, the dominant human mitochondrial DNA lineage in West Eurasia: the Near Eastern and Caucasian perspective. Mol Biol Evol 24: 436-448.
Near East	Near East	Near East	Kuwait	Kuwait	18	Roostalu U, Kutuev I, Loogväli E-L, Metspalu E, Tambets K, et al. (2007) Origin and expansion of haplogroup H, the dominant human mitochondrial DNA lineage in West Eurasia: the Near Eastern and Caucasian perspective. Mol Biol Evol 24: 436-448.
Near East	Near East	Near East	Kuwait	–	5	Reidla M, Kivisild T, Metspalu E, Kaldma K, Tambets K, et al. (2003) Origin and diffusion of mtDNA haplogroup X. Am J Hum Genet 73: 1178-1190.
Near East	Near East	Near East	Lebanon	–	35	Richards M, Macaulay V, Hickey E, Vega E, Sykes B, et al. (2000) Tracing European founder lineages in the Near Eastern mtDNA pool. Am J Hum Genet 67: 1251-1276.
Near East	Near East	Near East	Lebanon	–	35	Roostalu U, Kutuev I, Loogväli E-L, Metspalu E, Tambets K, et al. (2007) Origin and expansion of haplogroup H, the dominant human mitochondrial DNA lineage in West Eurasia: the Near Eastern and Caucasian perspective. Mol Biol Evol 24: 436-448.
Near East	Near East	Near East	Oman	–	9	Roostalu U, Kutuev I, Loogväli E-L, Metspalu E, Tambets K, et al. (2007) Origin and expansion of haplogroup H, the dominant human mitochondrial DNA lineage in West Eurasia: the Near Eastern and Caucasian perspective. Mol Biol Evol 24: 436-448.
Near East	Near East	Near East	Pakistan	Pathan; North West Frontier Province and Balochistan	44	Quintana-Murci L, Chaix R, Wells RS, Behar DM, Sayar H, et al. (2004) Where west meets east: the complex mtDNA landscape of the southwest and Central Asian corridor. Am J Hum Genet 74: 827-845.
Near East	Near East	Near East	Republic of Abkhazia	Abkharzians; Northwest Caucasus	28	Roostalu U, Kutuev I, Loogväli E-L, Metspalu E, Tambets K, et al. (2007) Origin and expansion of haplogroup H, the dominant human mitochondrial DNA lineage in West Eurasia: the Near Eastern and Caucasian perspective. Mol Biol Evol 24: 436-448.
Near East	Near East	Near East	Russia	Adygei	4	Reidla M, Kivisild T, Metspalu E, Kaldma K, Tambets K, et al. (2003) Origin and diffusion of mtDNA haplogroup X. Am J Hum Genet 73: 1178-1190.
Near East	Near East	Near East	Saudi Arabia	Central Region	189	Abu-Amero KK, Larruga JM, Cabrera VM, González AM (2008) Mitochondrial DNA structure in the Arabian Peninsula. BMC Evol Biol 8: 45.
Near East	Near East	Near East	Saudi Arabia	Eastern Region	4	Abu-Amero KK, Larruga JM, Cabrera VM, González AM (2008) Mitochondrial DNA structure in the Arabian Peninsula. BMC Evol Biol 8: 45.
Near East	Near East	Near East	Saudi Arabia	Northern Region	43	Abu-Amero KK, Larruga JM, Cabrera VM, González AM (2008) Mitochondrial DNA structure in the Arabian Peninsula. BMC Evol Biol 8: 45.
Near East	Near East	Near East	Saudi Arabia	Southern Region	109	Abu-Amero KK, Larruga JM, Cabrera VM, González AM (2008) Mitochondrial DNA structure in the Arabian Peninsula. BMC Evol Biol 8: 45.
Near East	Near East	Near East	Saudi Arabia	Southern Region	91	Abu-Amero KK, Larruga JM, Cabrera VM, González AM (2008) Mitochondrial DNA structure in the Arabian Peninsula. BMC Evol Biol 8: 45.
Near East	Near East	Near East	Saudi Arabia	Western Region	72	Abu-Amero KK, Larruga JM, Cabrera VM, González AM (2008) Mitochondrial DNA structure in the Arabian Peninsula. BMC Evol Biol 8: 45.
Near East	Near East	Near East	Saudi Arabia	–	33	Abu-Amero KK, Larruga JM, Cabrera VM, González AM (2008) Mitochondrial DNA structure in the Arabian Peninsula. BMC Evol Biol 8: 45.
Near East	Near East	Near East	Saudi Arabia	–	33	Abu-Amero KK, Larruga JM, Cabrera VM, González AM (2008) Mitochondrial DNA structure in the Arabian Peninsula. BMC Evol Biol 8: 45.
Near East	Near East	Near East	Saudi Arabia	–	2	Reidla M, Kivisild T, Metspalu E, Kaldma K, Tambets K, et al. (2003) Origin and diffusion of mtDNA haplogroup X. Am J Hum Genet 73: 1178-1190.
Near East	Near East	Near East	Saudi Arabia	–	1	Richards M, Macaulay V, Hickey E, Vega E, Sykes B, et al. (2000) Tracing European founder lineages in the Near Eastern mtDNA pool. Am J Hum Genet 67: 1251-1276.
Near East	Near East	Near East	Saudi Arabia	–	20	Roostalu U, Kutuev I, Loogväli E-L, Metspalu E, Tambets K, et al. (2007) Origin and expansion of haplogroup H, the dominant human mitochondrial DNA lineage in West Eurasia: the Near Eastern and Caucasian perspective. Mol Biol Evol 24: 436-448.
Near East	Near East	Near East	Spain	Lebanese	7	Reidla M, Kivisild T, Metspalu E, Kaldma K, Tambets K, et al. (2003) Origin and diffusion of mtDNA haplogroup X. Am J Hum Genet 73: 1178-1190.
Near East	Near East	Near East	Syria	–	2	Reidla M, Kivisild T, Metspalu E, Kaldma K, Tambets K, et al. (2003) Origin and diffusion of mtDNA haplogroup X. Am J Hum Genet 73: 1178-1190.
Near East	Near East	Near East	Syria	–	71	Richards M, Macaulay V, Hickey E, Vega E, Sykes B, et al. (2000) Tracing European founder lineages in the Near Eastern mtDNA pool. Am J Hum Genet 67: 1251-1276.
Near East	Near East	Near East	Syria	–	28	Roostalu U, Kutuev I, Loogväli E-L, Metspalu E, Tambets K, et al. (2007) Origin and expansion of haplogroup H, the dominant human mitochondrial DNA lineage in West Eurasia: the Near Eastern and Caucasian perspective. Mol Biol Evol 24: 436-448.
Near East	Near East	Near East	Syria	–	49	Vernesi C, Di Benedetto G, Caramelli D, Secchieri E, Simoni L, et al. (2001) Genetic characterization of the body attributed to the evangelist Luke. Proc Natl Acad Sci U S A 98: 13460-13463.
Near East	Near East	Near East	Tajikistan	Shugnan; High Pamirs	44	Quintana-Murci L, Chaix R, Wells RS, Behar DM, Sayar H, et al. (2004) Where west meets east: the complex mtDNA landscape of the southwest and Central Asian corridor. Am J Hum Genet 74: 827-845.
Near East	Near East	Near East	Tanzania	Iraqw	12	Knight A, Underhill PA, Mortensen HM, Zhivotovsky LA, Lin AA, et al. (2003) African Y chromosome and mtDNA divergence provides insight into the history of click languages. Curr Biol 13: 464-473.
Near East	Near East	Near East	Turkey	Anatolia	45	Comas D, Calafell F, Mateu E, Perez-Lezaun A, Bertranpetit J (1996) Geographic variation in human mitochondrial DNA control region sequence: the population history of Turkey and its relationship to the European populations. Mol Biol Evol 13: 1067-1077.
Near East	Near East	Near East	Turkey	Anatolia	50	Quintana-Murci L, Chaix R, Wells RS, Behar DM, Sayar H, et al. (2004) Where west meets east: the complex mtDNA landscape of the southwest and Central Asian corridor. Am J Hum Genet 74: 827-845.
Near East	Near East	Near East	Turkey	Kurd	29	Comas D, Calafell F, Bendukidze N, Fananas L, Bertranpetit J (2000) Georgian and kurd mtDNA sequence analysis shows a lack of correlation between languages and female genetic lineages. Am J Phys Anthropol 112: 5-16.
Near East	Near East	Near East	Turkey	–	29	Calafell F, Underhill P, Tolun A, Angelicheva D, Kalaydjieva L (1996) From Asia to Europe: mitochondrial DNA sequence variability in Bulgarians and Turks. Ann Hum Genet 60: 35-49.
Near East	Near East	Near East	Turkey	–	72	Di Benedetto G, Ergüven A, Stenico M, Castrfi L, Bertorelle G, et al. (2001) DNA diversity and population admixture in Anatolia. Am J Phys Anthropol 115: 144-156.
Near East	Near East	Near East	Turkey	–	50	Loogväli E-L, Roostalu U, Malyarchuk BA, Derenko MV, Kivisild T, et al. (2004) Disuniting uniformity: a pied cladistic canvas of mtDNA haplogroup H in Eurasia. Mol Biol Evol 21: 2012-2021.
Near East	Near East	Near East	Turkey	–	21	Richards M, Côrte-Real H, Forster P, Macaulay V, Wilkinson-Herbots H, et al. (1996) Paleolithic and neolithic lineages in the European mitochondrial gene pool. Am J Hum Genet 59: 185-203.
Near East	Near East	Near East	Turkey	–	196	Richards M, Macaulay V, Hickey E, Vega E, Sykes B, et al. (2000) Tracing European founder lineages in the Near Eastern mtDNA pool. Am J Hum Genet 67: 1251-1276.
Near East	Near East	Near East	Turkey	–	90	Roostalu U, Kutuev I, Loogväli E-L, Metspalu E, Tambets K, et al. (2007) Origin and expansion of haplogroup H, the dominant human mitochondrial DNA lineage in West Eurasia: the Near Eastern and Caucasian perspective. Mol Biol Evol 24: 436-448.
Near East	Near East	Near East	Turkmenistan	Kurdish	32	Quintana-Murci L, Chaix R, Wells RS, Behar DM, Sayar H, et al. (2004) Where west meets east: the complex mtDNA landscape of the southwest and Central Asian corridor. Am J Hum Genet 74: 827-845.
Near East	Near East	Near East	Turkmenistan	Turkmen	41	Quintana-Murci L, Chaix R, Wells RS, Behar DM, Sayar H, et al. (2004) Where west meets east: the complex mtDNA landscape of the southwest and Central Asian corridor. Am J Hum Genet 74: 827-845.
Near East	Near East	Near East	United Arab Emirates	Dubai	249	Alshamali F, Brandstatter A, Zimmermann B, Parson W (2008) Mitochondrial DNA control region variation in Dubai, United Arab Emirates. Forensic Sci Int Genet 2: e9-10.
Near East	Near East	Near East	Uzbekistan	Uzbek; Surkhandarya	42	Quintana-Murci L, Chaix R, Wells RS, Behar DM, Sayar H, et al. (2004) Where west meets east: the complex mtDNA landscape of the southwest and Central Asian corridor. Am J Hum Genet 74: 827-845.
Near East	Near East	Near East	Yemen	Hajja or Hagga; western highlands	35	Černý V, Mulligan CJ, Rídl J, Žaloudková M, Edens CM, et al. (2008) Regional differences in the distribution of the sub-Saharan, West Eurasian, and South Asian mtDNA lineages in Yemen. Am J Phys Anthropol 136: 128-137.
Near East	Near East	Near East	Yemen	Hajja/Hagga; western highlands	35	Černý V, Mulligan CJ, Rídl J, Žaloudková M, Edens CM, et al. (2008) Regional differences in the distribution of the sub-Saharan, West Eurasian, and South Asian mtDNA lineages in Yemen. Am J Phys Anthropol 136: 128-137.
Near East	Near East	Near East	Yemen	Hudeida in the Tihama plain	67	Černý V, Mulligan CJ, Rídl J, Žaloudková M, Edens CM, et al. (2008) Regional differences in the distribution of the sub-Saharan, West Eurasian, and South Asian mtDNA lineages in Yemen. Am J Phys Anthropol 136: 128-137.
Near East	Near East	Near East	Yemen	Hudeida; Taihama plain	67	Černý V, Mulligan CJ, Rídl J, Žaloudková M, Edens CM, et al. (2008) Regional differences in the distribution of the sub-Saharan, West Eurasian, and South Asian mtDNA lineages in Yemen. Am J Phys Anthropol 136: 128-137.
Near East	Near East	Near East	Yemen	Jews	45	Non AL, Al-Meeri A, Raaum RL, Sanchez LF, Mulligan CJ (2011) Mitochondrial DNA reveals distinct evolutionary histories for Jewish populations in Yemen and Ethiopia. Am J Phys Anthropol 144: 1-10.
Near East	Near East	Near East	Yemen	Jews	5	Di Rienzo A, Wilson AC (1991) Branching pattern in the evolutionary tree for human mitochondrial DNA. Proc Natl Acad Sci U S A 88: 1597-1601.
Near East	Near East	Near East	Yemen	Jews	38	Richards M, Macaulay V, Hickey E, Vega E, Sykes B, et al. (2000) Tracing European founder lineages in the Near Eastern mtDNA pool. Am J Hum Genet 67: 1251-1276.
Near East	Near East	Near East	Yemen	Soqotra	66	Černý V, Pereira L, Kujanová M, Vašíková A, Hájek M, et al. (2009) Out of Arabia-the settlement of island Soqotra as revealed by mitochondrial and Y chromosome genetic diversity. Am J Phys Anthropol 138: 439-447.
Near East	Near East	Near East	Yemen	Ta'izz; western highlands	43	Černý V, Mulligan CJ, Rídl J, Žaloudková M, Edens CM, et al. (2008) Regional differences in the distribution of the sub-Saharan, West Eurasian, and South Asian mtDNA lineages in Yemen. Am J Phys Anthropol 136: 128-137.
Near East	Near East	Near East	Yemen	Wadi Hadramawt valley; Eastern	40	Černý V, Mulligan CJ, Rídl J, Žaloudková M, Edens CM, et al. (2008) Regional differences in the distribution of the sub-Saharan, West Eurasian, and South Asian mtDNA lineages in Yemen. Am J Phys Anthropol 136: 128-137.
Near East	Near East	Near East	Yemen	Wadi Hadramawt; eastern	40	Černý V, Mulligan CJ, Rídl J, Žaloudková M, Edens CM, et al. (2008) Regional differences in the distribution of the sub-Saharan, West Eurasian, and South Asian mtDNA lineages in Yemen. Am J Phys Anthropol 136: 128-137.
Near East	Near East	Near East	Yemen	western highlands close to Ta'izz	43	Černý V, Mulligan CJ, Rídl J, Žaloudková M, Edens CM, et al. (2008) Regional differences in the distribution of the sub-Saharan, West Eurasian, and South Asian mtDNA lineages in Yemen. Am J Phys Anthropol 136: 128-137.
Near East	Near East	Near East	Yemen	–	115	Kivisild T, Reidla M, Metspalu E, Rosa A, Brehm A, et al. (2004) Ethiopian mitochondrial DNA heritage: tracking gene flow across and around the gate of tears. Am J Hum Genet 75: 752-770.
Near East	Near East	Near East	Yemen	–	50	Non AL, Al-Meeri A, Raaum RL, Sanchez LF, Mulligan CJ (2011) Mitochondrial DNA reveals distinct evolutionary histories for Jewish populations in Yemen and Ethiopia. Am J Phys Anthropol 144: 1-10.
Near East	Near East	Near East	Yemen	–	5	Roostalu U, Kutuev I, Loogväli E-L, Metspalu E, Tambets K, et al. (2007) Origin and expansion of haplogroup H, the dominant human mitochondrial DNA lineage in West Eurasia: the Near Eastern and Caucasian perspective. Mol Biol Evol 24: 436-448.
Near East	Near East	Near East	Yugoslavia	–	1	Richards M, Côrte-Real H, Forster P, Macaulay V, Wilkinson-Herbots H, et al. (1996) Paleolithic and neolithic lineages in the European mitochondrial gene pool. Am J Hum Genet 59: 185-203.
Near East	Near East	Near East	–	Balkans	50	Loogväli E-L, Roostalu U, Malyarchuk BA, Derenko MV, Kivisild T, et al. (2004) Disuniting uniformity: a pied cladistic canvas of mtDNA haplogroup H in Eurasia. Mol Biol Evol 21: 2012-2021.
Near East	Near East	Near East	–	Bedouin	29	Di Rienzo A, Wilson AC (1991) Branching pattern in the evolutionary tree for human mitochondrial DNA. Proc Natl Acad Sci U S A 88: 1597-1601.
Near East	Near East	Near East	–	Near East	50	Loogväli E-L, Roostalu U, Malyarchuk BA, Derenko MV, Kivisild T, et al. (2004) Disuniting uniformity: a pied cladistic canvas of mtDNA haplogroup H in Eurasia. Mol Biol Evol 21: 2012-2021.
TOTAL					46547

## Sheet: Table S2_Y-chromosome
Supplementary Table S2. Origin of the sample sizes used in the present study for Y-chromosome population comparison.
Continent	Y-SNP	Continental Region	Sub-Region	Country	Sample Size	Reference
Europe	Y-SNPs	South-East Italy	Puglia	Italy	49	Capelli C, Brisighelli F, Scarnicci F, Arredi B, Caglia A, Vetrugno G, Tofanelli S, Onofri V, Tagliabracci A, Paoli G, Pascali VL (2007) Y chromosome genetic variation in the Italian peninsula is clinal and supports an admixture model for the Mesolithic-Neolithic encounter. Mol Phylogenet Evol 44: 228-39
Europe	Y-SNPs	North-East Italy	Trentino Alto Adige	Italy	34	Capelli C, Brisighelli F, Scarnicci F, Arredi B, Caglia A, Vetrugno G, Tofanelli S, Onofri V, Tagliabracci A, Paoli G, Pascali VL (2007) Y chromosome genetic variation in the Italian peninsula is clinal and supports an admixture model for the Mesolithic-Neolithic encounter. Mol Phylogenet Evol 44: 228-39
Europe	Y-SNPs	Central-West Italy	Lazio	Italy	44	Capelli C, Brisighelli F, Scarnicci F, Arredi B, Caglia A, Vetrugno G, Tofanelli S, Onofri V, Tagliabracci A, Paoli G, Pascali VL (2007) Y chromosome genetic variation in the Italian peninsula is clinal and supports an admixture model for the Mesolithic-Neolithic encounter. Mol Phylogenet Evol 44: 228-39
Europe	Y-SNPs	South-East Italy	Puglia	Italy	60	Capelli C, Onofri V, Brisighelli F, Boschi I, Scarnicci F, Masullo M, Ferri G, Tofanelli S, Tagliabracci A, Gusmao L, Amorim A, Gatto F, Kirin M, Merlitti D, Brion M, Verea AB, Romano V, Cali F, Pascali V (2009) Moors and Saracens in Europe: estimating the medieval North African male legacy in southern Europe. Eur J Hum Genet 17: 848-52
Europe	Y-SNPs	Central-East Italy	Marche	Italy	155	Onofri V, Alessandrini F, Turchi C, Fraternale B, Buscemi L, Pesaresi M, Tagliabracci A (2007) Y-chromosome genetic structure in sub-Apennine populations of Central Italy by SNP and STR analysis. Int J Legal Med 121: 234-7
Europe	Y-SNPs	Central-East Italy	Emilia Romagn	Italy	34	Ferri G, Ceccardi S, Lugaresi F, Bini C, Ingravallo F, Cicognani A, Falconi M, Pelotti S (2008) Male haplotypes and haplogroups differences between urban (Rimini) and rural area (Valmarecchia) in Romagna region (North Italy). Forensic Sci Int 175: 250-5
Europe	Y-SNPs	Central-West Italy	Tuscany	Italy	40	Capelli C, Brisighelli F, Scarnicci F, Arredi B, Caglia A, Vetrugno G, Tofanelli S, Onofri V, Tagliabracci A, Paoli G, Pascali VL (2007) Y chromosome genetic variation in the Italian peninsula is clinal and supports an admixture model for the Mesolithic-Neolithic encounter. Mol Phylogenet Evol 44: 228-39
Europe	Y-SNPs	Central-East Italy	Marche	Italy	59	Capelli C, Brisighelli F, Scarnicci F, Arredi B, Caglia A, Vetrugno G, Tofanelli S, Onofri V, Tagliabracci A, Paoli G, Pascali VL (2007) Y chromosome genetic variation in the Italian peninsula is clinal and supports an admixture model for the Mesolithic-Neolithic encounter. Mol Phylogenet Evol 44: 228-39
Europe	Y-SNPs	Central-West Italy	Tuscany (Elba island)	Italy	94	Capelli C, Brisighelli F, Scarnicci F, Arredi B, Caglia A, Vetrugno G, Tofanelli S, Onofri V, Tagliabracci A, Paoli G, Pascali VL (2007) Y chromosome genetic variation in the Italian peninsula is clinal and supports an admixture model for the Mesolithic-Neolithic encounter. Mol Phylogenet Evol 44: 228-39
Europe	Y-SNPs	Central-East Italy	Marche (Appennine)	Italy	25	Capelli C, Brisighelli F, Scarnicci F, Arredi B, Caglia A, Vetrugno G, Tofanelli S, Onofri V, Tagliabracci A, Paoli G, Pascali VL (2007) Y chromosome genetic variation in the Italian peninsula is clinal and supports an admixture model for the Mesolithic-Neolithic encounter. Mol Phylogenet Evol 44: 228-39
Europe	Y-SNPs	Central-West Italy	Tuscany -Latium border	Italy	76	Capelli C, Brisighelli F, Scarnicci F, Arredi B, Caglia A, Vetrugno G, Tofanelli S, Onofri V, Tagliabracci A, Paoli G, Pascali VL (2007) Y chromosome genetic variation in the Italian peninsula is clinal and supports an admixture model for the Mesolithic-Neolithic encounter. Mol Phylogenet Evol 44: 228-39
Europe	Y-SNPs	South-West Italy	East Campania	Italy	46	Capelli C, Brisighelli F, Scarnicci F, Arredi B, Caglia A, Vetrugno G, Tofanelli S, Onofri V, Tagliabracci A, Paoli G, Pascali VL (2007) Y chromosome genetic variation in the Italian peninsula is clinal and supports an admixture model for the Mesolithic-Neolithic encounter. Mol Phylogenet Evol 44: 228-39
Europe	Y-SNPs	South-West Italy	West Campania	Italy	80	Capelli C, Brisighelli F, Scarnicci F, Arredi B, Caglia A, Vetrugno G, Tofanelli S, Onofri V, Tagliabracci A, Paoli G, Pascali VL (2007) Y chromosome genetic variation in the Italian peninsula is clinal and supports an admixture model for the Mesolithic-Neolithic encounter. Mol Phylogenet Evol 44: 228-39
Europe	Y-SNPs	South-West Italy	West Calabria	Italy	57	Capelli C, Brisighelli F, Scarnicci F, Arredi B, Caglia A, Vetrugno G, Tofanelli S, Onofri V, Tagliabracci A, Paoli G, Pascali VL (2007) Y chromosome genetic variation in the Italian peninsula is clinal and supports an admixture model for the Mesolithic-Neolithic encounter. Mol Phylogenet Evol 44: 228-39
Europe	Y-SNPs	Central-East Italy	Emilia Romagn	Italy	62	Ferri G, Alu M, Corradini B, Radheshi E, Beduschi G (2009) Slow and fast evolving markers typing in Modena males (North Italy). Forensic Sci Int Genet 3: e31-3
Europe	Y-SNPs	Sardinia	Sardinia	Italy	336	Contu D, Morelli L, Santoni F, Foster JW, Francalacci P, Cucca F (2008) Y-chromosome based evidence for pre-neolithic origin of the genetically homogeneous but diverse Sardinian population: inference for association scans. PLoS One 3: e1430
TOTAL					1251
Europe	Y-STRs (Yfiler)	Central-East Italy	Modena	Italy	100	Ferri G, Alù M, Corradini B, Radheshi E, Beduschi G (2009) Slow and fast evolving markers typing in Modena males (North Italy). Forensic Sci Int Genet 3: e31-3
Europe	Y-STRs (Yfiler)	North-East Italy	Brescia/Bergamo	Italy	100	Pelotti S, Bini C, Barbaro A, Caenazzo L, Carnevali E, Cerri N, Dominici R, Ferri G, Maniscalco M, Onofri V, Piccinini A, Previderè C, Ricci U, Robino C, Scarnicci F, Torricelli F, Venturi M, Presciuttini S, characterization GsgoY-c (2008) Microgeographic variation of Y-chromosome haplotypes in Italy. Forensic Science International: Genetics Supplement Series 1: 239-241
Europe	Y-STRs (Yfiler)	North-West Italy	Cuneo	Italy	86	Pelotti S, Bini C, Barbaro A, Caenazzo L, Carnevali E, Cerri N, Dominici R, Ferri G, Maniscalco M, Onofri V, Piccinini A, Previderè C, Ricci U, Robino C, Scarnicci F, Torricelli F, Venturi M, Presciuttini S, characterization GsgoY-c (2008) Microgeographic variation of Y-chromosome haplotypes in Italy. Forensic Science International: Genetics Supplement Series 1: 239-241
Europe	Y-STRs (Yfiler)	Central-West Italy	Tuscany	Italy	100	Carboni I, Nutini AL, Porfirio B, Genuardi M, Ricci U (2007) Genetic STRs variation in a large population from Tuscany (Italy). Forensic Sci Int Genet 1: e10-1
Europe	Y-STRs (Yfiler)	Central-East Italy	Marche	Italy	162	Onofri V, Alessandrini F, Turchi C, Fraternale B, Buscemi L, Pesaresi M, Tagliabracci A (2007) Y-chromosome genetic structure in sub-Apennine populations of Central Italy by SNP and STR analysis. Int J Legal Med 121: 234-7
Europe	Y-STRs (Yfiler)	North-East Italy	Verona	Italy	111	Turrina S, Atzei R, De Leo D (2006) Y-chromosomal STR haplotypes in a Northeast Italian population sample using 17plex loci PCR assay. Int J Legal Med 120: 56-9
Europe	Y-STRs (Yfiler)	Central-West Italy	Latium	Italy	54	Pelotti S, Bini C, Barbaro A, Caenazzo L, Carnevali E, Cerri N, Dominici R, Ferri G, Maniscalco M, Onofri V, Piccinini A, Previderè C, Ricci U, Robino C, Scarnicci F, Torricelli F, Venturi M, Presciuttini S, characterization GsgoY-c (2008) Microgeographic variation of Y-chromosome haplotypes in Italy. Forensic Science International: Genetics Supplement Series 1: 239-241
Europe	Y-STRs (Yfiler)	South-East Italy	South Apulia	Italy	53	Capelli C, Onofri V, Brisighelli F, Boschi I, Scarnicci F, Masullo M, Ferri G, Tofanelli S, Tagliabracci A, Gusmão L, Amorim A, Gatto F, Kirin M, Merlitti D, Brión M, Verea AB, Romano V, Calì F, Pascali V (2009) Moors and Saracens in Europe: estimating the medieval North African male legacy in southern Europe. Eur J Hum Genet 17: 848-52
TOTAL					766
